# Supplementary material for: Phantom motor execution as a treatment for phantom limb pain: protocol of an international, double-blind, randomised controlled clinical trial
Source: PubMed Central journal article supplement — BMJ Open. 2018 Jul 16;8(7):e021039. doi: 10.1136/bmjopen-2017-021039 (PMC6082487; doi:10.1136/bmjopen-2017-021039), 2018-07-16
Supplement: bmjopen-2017-021039.draft_revisions.pdf [file bmjopen-2017-021039.draft_revisions.pdf]

# BMJ Open

BMJ Open is committed to open peer review. As part of this commitment we make the peer review history of every article we publish publicly available.

When an article is published we post the peer reviewers' comments and the authors' responses online. We also post the versions of the paper that were used during peer review. These are the versions that the peer review comments apply to.

The versions of the paper that follow are the versions that were submitted during the peer review process. They are not the versions of record or the final published versions. They should not be cited or distributed as the published version of this manuscript.

BMJ Open is an open access journal and the full, final, typeset and author-corrected version of record of the manuscript is available on our site with no access controls, subscription charges or pay-per-view fees (<http://bmjopen.bmj.com>).

If you have any questions on BMJ Open's open peer review process please email [info.bmjopen@bmj.com](mailto:info.bmjopen@bmj.com)

# BMJ Open

## Phantom Motor Execution as a treatment for Phantom Limb Pain: Protocol of an international, double-blind, randomised, controlled clinical trial.

|                               |                                                                                                                                                                                                                                                                                                                                                                                                                                                                                                                                                                                                                                                                                                                                                                                                                                                                                                                                                                                                                                                                                                                                                                                                                                                                                                                                                                                                                                                                                                                                                                                                           |
|-------------------------------|-----------------------------------------------------------------------------------------------------------------------------------------------------------------------------------------------------------------------------------------------------------------------------------------------------------------------------------------------------------------------------------------------------------------------------------------------------------------------------------------------------------------------------------------------------------------------------------------------------------------------------------------------------------------------------------------------------------------------------------------------------------------------------------------------------------------------------------------------------------------------------------------------------------------------------------------------------------------------------------------------------------------------------------------------------------------------------------------------------------------------------------------------------------------------------------------------------------------------------------------------------------------------------------------------------------------------------------------------------------------------------------------------------------------------------------------------------------------------------------------------------------------------------------------------------------------------------------------------------------|
| Journal:                      | <i>BMJ Open</i>                                                                                                                                                                                                                                                                                                                                                                                                                                                                                                                                                                                                                                                                                                                                                                                                                                                                                                                                                                                                                                                                                                                                                                                                                                                                                                                                                                                                                                                                                                                                                                                           |
| Manuscript ID                 | bmjopen-2017-021039                                                                                                                                                                                                                                                                                                                                                                                                                                                                                                                                                                                                                                                                                                                                                                                                                                                                                                                                                                                                                                                                                                                                                                                                                                                                                                                                                                                                                                                                                                                                                                                       |
| Article Type:                 | Protocol                                                                                                                                                                                                                                                                                                                                                                                                                                                                                                                                                                                                                                                                                                                                                                                                                                                                                                                                                                                                                                                                                                                                                                                                                                                                                                                                                                                                                                                                                                                                                                                                  |
| Date Submitted by the Author: | 19-Dec-2017                                                                                                                                                                                                                                                                                                                                                                                                                                                                                                                                                                                                                                                                                                                                                                                                                                                                                                                                                                                                                                                                                                                                                                                                                                                                                                                                                                                                                                                                                                                                                                                               |
| Complete List of Authors:     | <p>Lendaro, Eva; Chalmers tekniska hogskola, Electrical Engineering<br/> Hermansson, Liselotte; University Health Care Research Centre, Faculty of Medicine and Health, Örebro University; Department of Prosthetics and Orthotics, Faculty of Medicine and Health, Örebro University Hospital,<br/> Burger, Helena; University Rehabilitation Institute; University of Ljubljana, Faculty of Medicine<br/> Van der Sluis, Corry; University of Groningen, University Medical Center Groningen, Rehabilitation Medicine<br/> McGuire, Brian; National University of Ireland, Galway, Ireland, School of Psychology &amp; Centre for Pain Research<br/> Pilch, Monika; National University of Ireland, Galway, Ireland, School of Psychology &amp; Centre for Pain Research<br/> Bunketorp-Käll, Lina; Sahlgrenska University Hospital, Centre for Advanced Reconstruction of Extremities<br/> Kulbacka-Ortiz, Katarzyna; Sahlgrenska University Hospital, Centre for Advanced Reconstruction of Extremities<br/> Rignér, Ingrid ; Sahlgrenska universitetssjukhuset, Gåskolan/Ortopedteknik<br/> Stockselius, Anita; Rehabcenter Sfären, Bräcke Diakoni<br/> Gudmundson, Lena; Rehabcenter Sfären, Bräcke Diakoni<br/> Widehammar, Cathrine; University Health Care Research Centre, Faculty of Medicine and Health, Örebro University<br/> Hill, Wendy; University of New Brunswick, Institute of Biomedical Engineering<br/> Geers, Sybille; Fysische Geneeskunde en Revalidatie, University Hospital Gent<br/> Ortiz-Catalan, Max; Chalmers tekniska hogskola, Electrical Engineering; Integrum AB</p> |
| Keywords:                     | Neurological pain < NEUROLOGY, Clinical trials < THERAPEUTICS, REHABILITATION MEDICINE                                                                                                                                                                                                                                                                                                                                                                                                                                                                                                                                                                                                                                                                                                                                                                                                                                                                                                                                                                                                                                                                                                                                                                                                                                                                                                                                                                                                                                                                                                                    |
|                               |                                                                                                                                                                                                                                                                                                                                                                                                                                                                                                                                                                                                                                                                                                                                                                                                                                                                                                                                                                                                                                                                                                                                                                                                                                                                                                                                                                                                                                                                                                                                                                                                           |

SCHOLARONE™  
Manuscripts

# Phantom Motor Execution as a treatment for Phantom Limb Pain: Protocol of an international, double-blind, randomised, controlled clinical trial.

Eva Lendaro<sup>1</sup>, Liselotte Hermanson<sup>2,3</sup>, Helena Burger<sup>4,5</sup>, Corry van der Sluis<sup>6</sup>, Brian E. McGuire<sup>7</sup>, Monika Pilch<sup>7</sup>, Lina Bunketorp-Käll<sup>8</sup>, Katarzyna Kulbacka-Ortiz<sup>8</sup>, Ingrid Rignér<sup>9</sup>, Anita Stocksélius<sup>10</sup>, Lena Gudmundson<sup>10</sup>, Cathrine Widehammar<sup>3</sup>, Wendy Hill<sup>11</sup>, Sybille Geers<sup>12</sup>, and Max Ortiz-Catalan<sup>1,13</sup>

<sup>1</sup> Biomechatronics and Neurorehabilitation Laboratory, Department of Electrical Engineering, Chalmers University of Technology, Gothenburg, Sweden

<sup>2</sup> Department of Prosthetics and Orthotics, Faculty of Medicine and Health, Örebro University Hospital, Örebro, Sweden

<sup>3</sup> Faculty of Medicine and Health, University Health Care Research Centre, Örebro University, Örebro, Sweden

<sup>4</sup> University Rehabilitation Institute, Ljubljana, Slovenia

<sup>5</sup> Faculty of Medicine, University of Ljubljana, Ljubljana, Slovenia

<sup>6</sup> University of Groningen, University Medical Centre Groningen, Department of Rehabilitation Medicine, Groningen, Netherlands

<sup>7</sup> School of Psychology & Centre for Pain Research, National University of Ireland, Galway, Ireland.

<sup>8</sup> Centre for Advanced Reconstruction of Extremities, Sahlgrenska University Hospital, Gothenburg, Sweden.

<sup>9</sup> Gåskolan/Ortopedteknik, Sahlgrenska University Hospital, Gothenburg, Sweden.

<sup>10</sup> Rehabcenter Sfären, Bräcke Diakoni, Stockholm, Sweden.

<sup>11</sup> Institute of Biomedical Engineering, University of New Brunswick, New Brunswick, Canada.

<sup>12</sup> Fysische Geneeskunde en Revalidatie, University Hospital Gent, Gent, Belgium.

<sup>13</sup> Integrum AB, Mölndal, Sweden.

Correspondence to: Dr. Max Ortiz-Catalan maxo@chalmers.se

## Abstract

**Introduction:** Phantom limb pain (PLP) is a chronic condition that can greatly diminish quality of life. Control over the phantom limb and exercise of such control have been hypothesized to reverse maladaptive brain changes correlated to PLP. Preliminary investigations have shown that decoding motor volition using myoelectric pattern recognition, while providing real-time feedback via virtual and augmented reality (VR-AR), facilitates phantom motor execution (PME) and reduces PLP.

Here we present the study protocol for an international (seven countries), multicentre (nine clinics), double-blind, randomized, controlled clinical trial to assess the effectiveness of PME in alleviating PLP.

**Methods and analysis:** Sixty-seven subjects suffering from PLP in upper or lower limbs are randomly assigned to PME or Phantom Motor Imagery (PMI) interventions. Subjects allocated to either treatment receive 15 interventions and are exposed to the same VR-AR environments using the same device. The only difference between interventions is whether phantom movements are actually performed (PME) or just imagined (PMI). Complete evaluations are conducted at baseline and at intervention completion, as well as 1, 3 and 6 months later using an intention to treat approach. Changes in PLP measured using the Pain Rating Index between the first and last session are the primary measure of efficacy. Secondary outcomes include: frequency, duration, quality of pain, intrusion of pain in activities of daily living and sleep, disability associated to pain, pain self-efficacy, frequency of depressed mood, presence of

catastrophizing thinking, health-related quality of life and clinically significant change as patient's own impression. Follow-up interviews are conducted up to six months after the treatment.

**Ethics and dissemination:** The study is performed in agreement with the Declaration of Helsinki, and under approval by the governing ethical committees of each participating clinic. The results will be published according to the CONSORT guidelines in a peer-reviewed journal.

## Strengths and limitations of this study

### Strengths

- This study involves a large number of participants (>60) with upper and lower limb amputations and thus can provide sufficient power to draw clinically meaningful conclusions
- This study is double-blinded, randomized, and conducted in geographically different locations which enhances generalizability.
- The choice of the comparator allows controlling in a stringent manner for the effect of the key factor hypothesized as the cause of pain reduction, namely, the execution of phantom limb movements.

### Limitations

- Treatment is limited to 15 sessions, which might not be enough to alleviate pain in all participants.
- The nature of the experimental treatment (PME) does not allow inclusion of individuals from which myoelectric signals cannot be recorded from the muscles in their residual limbs.

### Trial Registration

| DATA CATEGORY                                 | INFORMATION                                                                                                                       |
|-----------------------------------------------|-----------------------------------------------------------------------------------------------------------------------------------|
| Primary registry and trial identifying number | ClinicalTrials.gov NCT03112928                                                                                                    |
| Date of registration in primary registry      | April 10, 2017                                                                                                                    |
| Source(s) of monetary or material support     | Promobilia foundation (F16501), VINNOVA (Medtech4Health 2016-02290), EFIC Grünenthal Grant (358041552) and Integrum AB (sponsor). |
| Coordinator                                   | Chalmers University of Technology, Sweden                                                                                         |
| Investigational sites                         | Sahlgrenska University Hospital, Sweden<br>Örebro University, Sweden<br>Bräcke Diakoni, Sweden                                    |

| DATA CATEGORY                             | INFORMATION                                                                                                                                                                                                                                                                  |
|-------------------------------------------|------------------------------------------------------------------------------------------------------------------------------------------------------------------------------------------------------------------------------------------------------------------------------|
|                                           | University Rehabilitation Institute, Slovenia<br>Ghent University Hospital, Belgium<br>University Medical Center Groningen, The Netherlands<br>The University of New Brunswick, Canada<br>National University of Ireland, Galway, Ireland<br>Ruhr-University Bochum, Germany |
| Sponsor                                   | Integrum AB                                                                                                                                                                                                                                                                  |
| Contact for public queries                | Eva Lendaro, MSc, +46704231352<br><a href="mailto:lendaro@chalmers.se">lendaro@chalmers.se</a>                                                                                                                                                                               |
| Contact for scientific queries            | Max Ortiz Catalan, PhD, +46708461065<br><a href="mailto:maxo@chalmers.se">maxo@chalmers.se</a>                                                                                                                                                                               |
| Public title                              | <i>Phantom Motor Execution as a Treatment of Phantom Limb Pain</i>                                                                                                                                                                                                           |
| Scientific title                          | <i>Phantom Motor Execution Via Myoelectric Pattern Recognition, Virtual and Augmented Reality, and Serious Gaming as a Treatment of Phantom Limb Pain</i>                                                                                                                    |
| Countries of recruitment                  | Sweden, Slovenia, Netherlands, Belgium, Ireland, Canada, Germany                                                                                                                                                                                                             |
| Health condition(s) or problem(s) studied | Phantom Limb Pain                                                                                                                                                                                                                                                            |
| Intervention(s)                           | Experimental: Phantom Motor Execution<br><br>Control: Phantom Motor Imagery                                                                                                                                                                                                  |
| Key eligibility criteria                  | <ul style="list-style-type: none"> <li>• The participants must be older than 18 years with chronic PLP</li> <li>• People with acute PLP are non-eligible. At least six months should have passed since</li> </ul>                                                            |

| DATA CATEGORY | INFORMATION                                                                                                                                                                                                                                                                                                                                                                                                                                                                                                                                                                                                                                                                                                                                                                                                                                                                                                                                                                                                                                                                                                                                                                                                                                                                                                                                                                                                                                                                     |
|---------------|---------------------------------------------------------------------------------------------------------------------------------------------------------------------------------------------------------------------------------------------------------------------------------------------------------------------------------------------------------------------------------------------------------------------------------------------------------------------------------------------------------------------------------------------------------------------------------------------------------------------------------------------------------------------------------------------------------------------------------------------------------------------------------------------------------------------------------------------------------------------------------------------------------------------------------------------------------------------------------------------------------------------------------------------------------------------------------------------------------------------------------------------------------------------------------------------------------------------------------------------------------------------------------------------------------------------------------------------------------------------------------------------------------------------------------------------------------------------------------|
|               | <p>amputation</p> <ul style="list-style-type: none"> <li>• In case of pharmacological treatments, the dosage must have been stable for the last month</li> <li>• Any previous PLP treatment must have terminated at least 3 months prior to commencing the study</li> <li>• Any pain reduction potentially attributable to previous PLP treatments must have occurred at least 3 months prior to commencing the study</li> <li>• Voluntary control over at least a portion of biceps and triceps muscles in case of upper limb amputation, or quadriceps and hamstrings in case of lower limb amputation.</li> <li>• Stable prosthetic situation (i.e. satisfaction with the fitting of the prosthesis) or being a non-user.</li> <li>• The participant should not have cognitive impairment that prevents them from following instructions.</li> <li>• No abundant soft tissue on the stump that prevents sufficient myoelectric signals from being recorded.</li> <li>• No presence of pain &gt; 2 on a numeric rating scale (NRS) upon contact with the skin or muscle contraction in the stump</li> <li>• The PLP must not be aggravated (NRS &gt; 4) by the execution or imagination of phantom movements</li> <li>• No condition associated with risk of poor protocol compliance</li> <li>• No injury, disease or addiction that would render the individual unsuitable for the trial</li> <li>• Pain Rating Index &gt; 0 as assessed in the Q-PLP at Visit 0</li> </ul> |
| Study type    | <p>Interventional<br/> Allocation: randomized<br/> Intervention model: parallel assignment<br/> Masking: double-blind (participant, evaluator)<br/> Primary purpose: treatment</p>                                                                                                                                                                                                                                                                                                                                                                                                                                                                                                                                                                                                                                                                                                                                                                                                                                                                                                                                                                                                                                                                                                                                                                                                                                                                                              |

| DATA CATEGORY           | INFORMATION                                                       |
|-------------------------|-------------------------------------------------------------------|
| Date of first enrolment | May 8 <sup>th</sup> , 2017                                        |
| Target sample size      | 67                                                                |
| Recruitment status      | Recruiting                                                        |
| Primary outcome         | Change in Phantom Limb Pain as measured by the Pain Rating Index. |

#### Protocol version

Clinical investigation plan code 007 733, version 02, 2017-05-24.

#### Sponsor contact information

Trial Sponsor: Integrum AB

Contact name: Malin Ling

Address: Krokslätts Fabriker 50, SE-431 37, Mölndal, Sweden

Telephone: +46723198311

Email: malin.ling@Integrum.se

#### Funding

This study was funded by the Promobilia foundation (F16501), VINNOVA (Medtech4Health 2016-02290), EFIC Grünenthal Grant (358041552), and Integrum AB (sponsor).

#### Role of study sponsor and funders

The sponsor (Integrum AB) provided the devices and materials used in this study. Neither the sponsor nor the funders (Promobilia, VINNOVA, EGG) had a role in the design of the present protocol.

#### Roles and responsibilities

MO-C is the coordinating investigator of the study and endpoint adjudication evaluator. EL is the monitor of the trial, independent from the sponsor, and responsible for data management. Each site is constituted by at least a principal investigator, a therapist, and a blinded-evaluator. Investigational sites are independent from each other and from the sponsor.

#### Authors' contributions

MO-C conceived the PME treatment. MO-C and EL reviewed the literature and designed the study. All authors provided feedback on the design of the trial. BMG and MP assisted in the selection of psychological measure. LB-K and KK-O coordinated the ethical applications. EL and MO-C drafted the

1  
2  
3 manuscript. EL, LH, HB, CS, BMG, MP, LB-K, KK-O, IR, AS, LG, CW, WH, SG and MO-C revised the study  
4 protocol and approved the final manuscript.  
5

### 6 **Competing interests**

7 The sponsor of this study (Integrum AB) is a for-profit organization that might commercialize the device  
8 used in this study (PME and PMI). MO-C was partially funded by Integrum AB. The core technology used  
9 in this study has been made freely available as open source by MO-C (machine learning, virtual reality  
10 and electronics). All the other authors declare no competing interests.  
11  
12

## 13 **Introduction**

14 Phantom limb pain (PLP) is a chronic condition commonly suffered by amputees (Clark et al., 2013;  
15 Dijkstra et al., 2002). Although more than 60 different treatments to alleviate PLP have been described  
16 in the literature (Nikolajsen and Jensen, 2001), controlled clinical trials on such treatments are scarce.  
17 The clinical investigation presented in this protocol aims to evaluate the efficacy of Phantom Motor  
18 Execution (PME) in reducing Phantom Limb Pain (PLP) in an international, multi-centre, double blind,  
19 randomized, controlled clinical trial. PME is accomplished by using a system (Neuromotus, Integrum AB,  
20 Sweden) that employs myoelectric pattern recognition to predict motor volition (movements of the  
21 phantom limb), while providing real-time feedback to the patient in virtual and augmented reality  
22 (VR/AR) environments. This technology allows the application of serious gaming in the therapy. PME is a  
23 non-invasive, non-pharmacological, and engaging treatment with no identified side effects at present  
24 (Ortiz-Catalan *et al.*, 2014, 2016).  
25  
26  
27  
28

29 The effectiveness of PME was initially explored in a single upper limb amputee, with satisfactory results  
30 reported (Ortiz-Catalan *et al.*, 2014). Prior to the pilot study, the patient had shown resistance to a  
31 variety of treatments for 48 years (including mirror therapy). After PME, the sustained level of pain  
32 reported by the patient was gradually reduced to pain-free periods. He and his family also reported less  
33 intrusion of PLP in sleep and activities of daily living (ADL). Finally, the patient also acquired the ability to  
34 freely move his phantom arm and hand, consistent with a recent study by Raffin and colleagues where  
35 they found that reduced capability of phantom movement was correlated with more severe PLP (Raffin  
36 2016).  
37  
38

39 In the light of the findings in the case study, a non-randomized clinical investigation on PME was  
40 conducted in subjects with chronic intractable upper limb PLP (Ortiz-Catalan *et al.*, 2016). Fourteen  
41 patients, for whom conventional PLP treatments failed and who suffered from PLP for an average of 10  
42 years, received 12 treatment sessions of PME, each of 1.5 hours' duration. At the end of the treatment  
43 period, patients showed statistically and clinically significant improvements (approx. 50% reduction of  
44 PLP). Intrusion of PLP during sleep and ADL was also reduced by a similar degree. These improvements  
45 were still present up to 6 months' post-treatment (Ortiz-Catalan *et al.*, 2016). More recently, PME was  
46 also proven to be a viable treatment for PLP in lower limb amputations (Lendaro *et al.*, 2017).  
47  
48

49 Strong evidence shows that PLP is related to neuroplastic changes in the primary somatosensory cortex,  
50 suggesting that central maladaptive plasticity is responsible for its maintenance. Neuroplasticity-based  
51 approaches for the relief of PLP, such as motor imagery and mirror therapy, ultimately aim to regain  
52 brain circuitry from pain processing. Nonetheless, these approaches have been shown to be limited in  
53 their effectiveness.  
54  
55  
56  
57  
58



Although the practice of motor imagery has been shown to normalize previously altered cortical maps and reduce PLP (MacIver et al., 2008), evidence from randomized clinical studies has also suggested that it can increase pain (Chan et al., 2007). These seemingly contradictory findings suggest that motor imagery should not be used alone but combined with other interventions, such as graded motor imagery (Moseley, 2006) or mirror therapy (Bowering et al., 2013).

Mirror therapy has demonstrated higher effectiveness than motor imagery in reducing pain (Chan et al., 2007), however, it still cannot ensure that the patient performs movements with the phantom limb. For instance, it is enough for the patient to move their healthy arm to produce movement in the reflected limb. Whether a patient is actually engaging in execution of phantom limb movements is unknown. PME overcomes some of the methodological limitations of previous treatments by ensuring that central and peripheral mechanisms in motor control are activated during therapy.

### Study objective

This paper presents the study protocol for a RCT in which upper and lower limb amputees are treated. The investigation primarily aims at assessing the efficacy of PME aided by myoelectric pattern recognition, augmented and virtual reality, and serious gaming to reduce Phantom Limb Pain (PLP). In order to isolate the contribution of PME in alleviating PLP over potential placebo effects, Phantom Motor Imagery (PMI) is used in this study as an active control treatment.

The working hypothesis of PME is that execution of phantom limb movements would exploit competitive neuroplasticity and provide a more integral normalization of cortical, sub-cortical, and spinal circuits compared to interventions that do not enable integration of sensory and motor information. Therefore, in this superiority trial, we expect the participants receiving the experimental treatment (PME) to obtain a larger reduction in PLP levels than those randomized to the control treatment.

### Trial design

This clinical study is an international, multicentre, double-blind, randomised controlled trial. The study takes place in seven counties and involves nine clinics, which are listed in Table 1. Participants are randomly assigned to receive either the experimental or the control treatment in a 2:1 allocation ratio. The choice of the allocation ration was made in order to collect more data on the intervention of interest and deemed superior. Each patient is followed up for a period of six months, at the end of

*Table 1: List of the investigational sites, divided by countries taking part to the international, multicenter randomized clinical trial.*

| Country     | Investigational site                                                                                            |
|-------------|-----------------------------------------------------------------------------------------------------------------|
| Sweden      | Sahlgrenska University Hospital, Gothenburg                                                                     |
|             | Örebro University Hospital, Örebro                                                                              |
|             | Rehabcenter Sfären, Bräcke Diakoni, Stockholm                                                                   |
| Slovenia    | University Rehabilitation Institute, Ljubljana                                                                  |
| Belgium     | Fysische Geneeskunde en Revalidatie University Hospital Gent, Gent                                              |
| Netherlands | Department of Rehabilitation Medicine, University Medical Centre Groningen, Groningen                           |
| Canada      | Institute of Biomedical Engineering, University of New Brunswick, New Brunswick                                 |
| Ireland     | Centre for Pain Research, National University of Ireland, Galway                                                |
| Germany     | Department of Psychosomatic Medicine and Psychotherapy, LWL University Hospital, Ruhr-University Bochum, Bochum |

1  
2  
3 which they are given the choice to undergo the alternative treatment. The total duration of the study is  
4 expected to be approximately three years.  
5

## 6 7 **Methods: Participants, interventions, and outcomes**

8 A procedural overview of the trial is provided by the flow diagram of Figure 1. Recruitment of the  
9 participants is conducted via advertisements at local investigation clinics, on social media, and in local  
10 newspapers. People who are interested in taking part in the trial are invited to contact the principal  
11 investigator of the site, or a person appointed by the principal investigator, via phone or email.  
12

### 13 **Eligibility criteria**

14 Interested people are invited to a pre-assessment visit (Visit 0). On this occasion, the therapist (clinical  
15 investigator) explains the study in detail and answers all the questions that might arise. Afterwards, the  
16 participants are asked to provide written informed consent (see Appendix A). If consent is granted,  
17 eligibility to the study is assessed according to the criteria presented below:  
18

- 19 • The participants must be older than 18 years with chronic PLP
- 20 • Participants must have chronic PLP - at least six months should have passed since amputation.  
21 Participants with acute PLP are non-eligible.
- 22 • In case of pharmacological treatments, the dosage must have been stable for the previous month
- 23 • Any previous PLP treatments must have terminated at least 3 months prior to entering the study
- 24 • Any pain reduction potentially attributable to previous PLP treatments must have occurred at  
25 least 3 months prior to entering the study
- 26 • Voluntary control over at least a portion of biceps and triceps muscles in case of upper limb  
27 amputation, or quadriceps and hamstrings in case of lower limb amputation.
- 28 • Stable prosthetic situation (i.e. satisfaction with the fitting of the prosthesis) or being a non-user.
- 29 • The subject should not have a cognitive impairment that prevents them from following  
30 instructions.
- 31 • No abundant soft tissue on the stump that prevents sufficient myoelectric signals from being  
32 recorded.
- 33 • No presence of pain > 2 on NRS upon contact with the skin or muscle contraction in the stump
- 34 • The PLP must not be aggravated (NRS > 4) by the execution or imagination of phantom  
35 movements
- 36 • No condition associated with risk of poor protocol compliance
- 37 • No injury, disease or addiction that would render the individual unsuitable for the trial
- 38 • Pain Rating Index (PRI) > 0 as assessed in the Questionnaire for Phantom Limb Pain (Q-PLP) at Visit 0

### 39 **Concomitant medications**

40 Any co-intervention aiming to reduce PLP is prohibited during the trial. However, in the design of the  
41 trial it is acknowledged that there is a large possibility for patients with PLP to be high consumers of  
42 analgesic medicines. Therefore, the use of concomitant medications is allowed provided that at the time  
43 of inclusion, the patient has stable consumption for at least one month before entering the study and  
44 any pain reduction potentially attributable to the drug occurred at least three months before entering  
45 the study. Intake of pain medication in patients who show considerable improvement can be gradually  
46 reduced at the discretion of the responsible physician, given that the patient is followed up regularly.  
47  
48  
49  
50  
51  
52  
53  
54  
55  
56  
57  
58

1  
2  
3 Medication intake is thus monitored as an outcome variable called “need of concomitant medication”,  
4 which is used to describe and compare the amount of co-medication in the treatment groups.  
5

## 6 Interventions

7 All of the therapists at the clinics are introduced to the technology with at least one practical  
8 demonstration by the first (EL) and/or last author (MO-C). The therapists conduct the interventions  
9 independently, and periodically the first author monitors the correct execution of the protocol.  
10 Participants in both intervention groups receive 15 treatment sessions of 2 hours’ duration, including  
11 system setup and a blinded outcome assessment. The frequency of the sessions is chosen by the  
12 participant and can be once, twice (advised frequency), or five times per week, yielding a total patient  
13 duration that ranges between 28 and 40 weeks. Both treatment groups use the same device and set up,  
14 which are sketched in Figure 2. The only difference between the two groups is the type of interaction  
15 with the virtual environments (active: motor execution; or passive: motor imagery). Allocated  
16 interventions for a given trial participant cannot be modified. Dates of the treatment sessions are  
17 recorded.  
18  
19  
20

## 21 Experimental Treatment

22 In the PME intervention, motor volition is decoded by interpreting the signals from the stump muscles  
23 via myoelectric pattern recognition (Ortiz-catalan et al., 2014; Ortiz-Catalan et al., 2013). The decoded  
24 movement is visualized in the virtual environments (i.e. virtual limb or serious gaming). The end result is  
25 that the user, by training with the system, can achieve control over the virtual environments by  
26 performing phantom limb movements associated with kinetic sensations analogous to the ones  
27 pertaining to the limb prior to amputation.  
28  
29

30 A treatment session consists of the following steps:

- 31 1. Placement of the electrodes and fiducial marker;
- 32 2. Treatment cycles  
33     ○ Recording session  
34     ○ Practice of PME with VR/AR  
35     ○ Serious gaming using phantom movements  
36     ○ Practice of PME by matching random target postures of a virtual arm in VR (TAC Test  
37     (Simon et al., 2011)).  
38
- 39 3. Pain evaluation (Q-PLP, see Outcomes section)  
40  
41

42 Different treatment cycles (step 2) are repeated during a treatment session in order to execute various  
43 phantom limb movements or combinations of movements. The level of difficulty gradually increases  
44 during the treatment phase from 1 to 5 by adding degrees of freedom to be trained within the same  
45 treatment cycle. In this context, a degree of freedom is any pair of movements performing opposite  
46 actions such as opening and closing of the hand, or extension and flexion of the knee.  
47  
48

49 Clinicians are instructed to advance the level of difficulty once the previous level is accomplished  
50 successfully, and revert to the previous level if the patient shows considerable difficulty accomplishing  
51 the tasks. More details on the acquisition of myoelectric signals, prediction of motor volition, the various  
52 parts of the treatment session, and the different levels of difficulty are presented in Appendix B.  
53  
54  
55  
56  
57  
58

## Control Treatment

In the control treatment (PMI), patients are not allowed to produce/execute phantom movements, but must imagine performing such movements while observing them executed autonomously by the VR/AR environments. The device is identical to the one used in the experimental treatment, but here the myoelectric signals are used to monitor that the patient does not produce muscular contractions, rather than decoding motor volition.

The control treatment session is conducted using the same step-wise procedure as the experimental group with the addition of a calibration step at the beginning of the treatment cycle. Calibration is necessary to set the threshold for myoelectric signals above which the system alerts the user that a muscular contraction is performed. As in PME, the treatment cycle is repeated for different imaginary phantom limb movements or a set of imaginary movements following the same levels of difficulty. In the game format, the participants control the game using the keyboard with an able limb. Bilateral upper limb amputees use a joystick with any able limb. Details on the methods are presented in Appendix B.

## Withdrawal or termination of individual participants

Participants are free to withdraw from participation in the study at any time upon request. An investigator may terminate participation in the study if:

- Any clinical adverse event, clinical abnormality, or other medical condition or situation occurs such that continued participation in the study would not be in the best interest of the participant.
- The participant no longer meets the eligibility criteria because of a condition newly developed or not previously recognized.

The main analysis will be conducted using the intention to treat (ITT) methodology. Missing data due to withdrawal or termination will be imputed using the 'last observation carried forward' method. From previous studies, the dropout rate is estimated at approximately 10% and this was taken into account for the calculation of the sample size.

## Outcomes

Outcomes will be evaluated at every treatment session and three follow-up assessments at one, three, and six months' post-treatment. The outcomes are measured by the evaluators following the participant treatment schedule presented in Table 2.

### Primary outcome measure

The primary outcome of the study is the change in PLP intensity measured by the difference in Pain Rating Index (PRI) between baseline (Visit 0) and at the post-treatment assessment (Visit 15). The PRI is computed as the sum of the scores for all descriptors of the Short Form of the McGill Pain Questionnaire (SF-MPQ) (Melzack, 1987).

### Secondary outcome measures

Secondary outcomes consider different aspects related to PLP such as pain frequency, pain duration, quality of pain, intrusion of pain in activities of daily living and sleep, disability associated with pain, pain self-efficacy, mood, presence of catastrophizing thinking, health-related quality of life and the patient's own impression about the effect of treatment. The secondary outcome measures are:

### *Pain Disability Index (PDI)*

Pain Disability Index, a 7-item questionnaire designed to investigate the extent to which chronic pain interferes with a person's ability to engage in various life activities (Pollard, 1984). An overall pain disability index score is obtained by summing the numerical ratings of the questionnaire's single items.

### *Questionnaire for Phantom Limb Pain (Q-PLP)*

The Q-PLP is a 16-item questionnaire based on a combination of the SF-MPQ (Melzack 1987) and study-specific questions used in previous studies ((Lendaro et al., 2017; Ortiz-Catalan et al., 2014, 2016)). The part containing the SF-MPQ is used for the calculation of the Pain Rating Index (primary outcome measure).

The Q-PLP assesses intensity, quality, duration, and frequency of phantom limb pain using the following metrics: the numeric rating scale (scale range 0 - 10) to assess the intensity of pain at present; the weighted pain distribution (scale range 0 - 5) to capture the time-varying nature of chronic pain by adding the contributions of weighted portions of time spent in six pain levels (present pain intensity scale (Melzack, 1975)); and a study-specific descriptive scale of seven steps: "never", "once per month", "once per week", "few times per week", "once per day", "few times per day", and "always" to measure the frequency of pain.

In addition, the Q-PLP is used to monitor the intensity of stump pain, phantom limb sensations, phantom motor ability, intrusion of phantom limb pain in activities of daily living and sleep, by one question each using a numeric rating scale. Changes in prosthetic hardware, medication, presence of telescoping (feeling that the phantom limb is gradually shortening over time), and location of pain are also monitored by the Q-PLP.

### *Euroqol-5D-5L (EQ-5D-5L)*

The EQ-5D-5L is a standardised questionnaire used to investigate health-related quality of life which is constituted by two components: health status and health evaluation (Herdman et al., 2011). Health status is measured in terms of five dimensions (mobility, self-care, usual activities, pain/discomfort, and anxiety/depression) on a five-point scale (no problems, slight problems, moderate problems, severe problems and extreme problems). In the health evaluation part, the EQ Visual Analogue Scale (EQ VAS) records the respondent's health on a vertical VAS where the end points are labelled 'best imaginable health state' and 'worst imaginable health state'.

### *Pain Self-Efficacy Questionnaire (PSEQ-2)*

The PSEQ-2 is a 2-item questionnaire that measures pain self-efficacy, which is the belief held by people with chronic pain that they can carry out certain activities and enjoy life, despite experiencing pain (Nicholas, 2007; Nicholas et al., 2015). The items of the questionnaire are rated on a numeric rating scale from 0 to 6.

### *Pain Catastrophizing Scale – 6 (PCS-6)*

The PCS-6 is a 6-item questionnaire that investigates catastrophizing thinking in a range from 0 to 4 (McWilliams et al., 2015; Sullivan et al., 1995). Pain catastrophizing denotes a negative cognitive-affective response to pain and is associated to increased pain severity, disability and depressive symptoms and is associated with poor adjustment to chronic pain (Sullivan et al., 2001).

### *Patient Health Questionnaire-2 (PHQ-2)*

The PHQ-2 is a screening instrument consisting of two items assessing the presence of a depressed mood and a loss of interest or pleasure in routine activities (Kroenke et al., 2003; Spitzer et al., 1999). The items of the questionnaire are rated on a numerical scale from 0 to 3.

### *Patients' Global Impression of Change (PGIC)*

The PGIC is a single question used to identify clinically significant change by rating the patient's belief about the efficacy of treatment on a 7-point scale, ranging from 'no change (or condition has got worse)' to 'a great deal better' (Hurst and Bolton, 2004).

## Additional measurements

Participants are asked to supply details regarding background information such as age, gender, height, weight, type and use of the prosthesis, level of embodiment of the prosthesis, onset of PLP, details about previous and ongoing intervention for PLP and side, level and date of amputation. Additionally, we also survey: patients' expectancy of benefit using the Expectations for Complementary and Alternative Medicine Treatments (EXPECT-SF) (Jones et al., 2016); patients' judgment about the credibility of the treatment using the Opinion About Treatment (OAT) (Mooney et al., 2015) and patients' perception of therapists' supportive behaviour using the short form of the 6-item Health Care Climate Questionnaire (HCCQ) (Williams et al., 1998).

## Sample size

The calculation of the sample size was based on our primary hypothesis and informed by our previous clinical trial with no control group (Ortiz-Catalan et al., 2016). In order to find a mean difference of 4 between the two randomised groups in the primary outcome measure (PRI), with power of 80% resulting from a two-sided Fisher's non-parametric permutation test at 5% significance level, is estimated that at least 60 participants are required. As a drop-out rate of 10% is expected, a total of 67 patients will be randomised.

## Methods: Assignment of intervention

### Randomization

Participants are assigned to the experimental or control group according to the optimal allocation scheme of minimization, aimed at reducing the imbalance between the number of patients allocated to each treatment group. The randomization proportion is 2:1, with twice as many subjects assigned to the experimental treatment. The allocation ratio was chosen because we predict with high confidence that the experimental treatment will outperform the control treatment, and because of the possibility to collect more information on important variables regarding the intervention of interest. The allocation aims to minimize the imbalance of the following factors:

- Level of amputation (upper and lower)
- Baseline PLP based on the NRS (low 1 to 4, and high 5 to 10)
- Investigation site (9 centres)

The minimisation process is conducted using the open source desktop application MinimPy (Saghaei, 2011), operated by the monitor of the clinical trial. Every time a research team at a particular investigational site recruits a new participant, they assess the person's eligibility for the study (Visit 0). Afterwards, if the participant is deemed eligible, the research team sends the minimization factors

1  
2  
3 relative to the enrolled participant to the monitor, who runs the randomisation, and informs the  
4 research team of the allocation.  
5

## 6 Blinding

7 This investigation has been designed in such a way that participants of the two treatment groups use the  
8 same device under the same circumstances.  
9

10 Even though the patients are necessarily aware of the treatment they are receiving, they do not have an  
11 expectation of superiority of the experimental over the control treatment (or vice versa), since the trial  
12 is framed as a comparison between two different interventions previously described in the literature. It  
13 is worth noting that the distinction between motor execution and motor imagery is often imperceptible,  
14 even for professionals in the field, who have often described voluntary movements of the missing limb  
15 as imaginary movements (Erslund et al., 1996; Hugdahl et al., 2001; Lotze et al., 2001; MacIver et al.,  
16 2008; Rosén et al., 2001; Roux et al., 2001, 2003). We take this fact as a corroborant of our assumption  
17 that there are no differences at baseline with respect to expectations and opinions about the assigned  
18 treatment among participants. Nevertheless, individuals' expectations regarding outcomes and  
19 credibility of the assigned treatment are assessed with the EXPECT-SF and the OAT questionnaires  
20 respectively.  
21  
22  
23

24 The nature of the investigation does not allow the masking of the treatment for the therapists.  
25 However, it is still important to check for possible differences between the two groups concerning the  
26 therapists' supportive behaviour. For this reason, the HCCQ, is included as a measure of the extent to  
27 which a health care provider (or the staff) interacts with their patient in a supportive manner.  
28  
29

30 The outcome assessments are conducted by independent persons who are blinded to the group  
31 allocation, making the trial double blind. In order to keep group allocation confidential, participants are  
32 requested prior to each assessment not to reveal allocation or therapy content to the evaluators.  
33

34 The raw data resulting from the outcome assessment has the same structure for both interventions,  
35 making it impossible to tell the group assignment without being in possession of the documents  
36 containing links between participant's identity and their code number.  
37  
38  
39  
40  
41  
42  
43  
44  
45  
46  
47  
48  
49  
50  
51  
52  
53  
54  
55  
56  
57  
58  
59  
60

Table 2: Summary of the different items (intervention, forms and questionnaires) to be completed at each evaluation appointment. Questionnaire for Phantom Limb Pain (Q-PLP), Pain Disability Index (PDI), 2-item Pain Self-Efficacy Questionnaire (PSEQ-2), Euroqol-5D-5L (EQ-5D-5L), Pain Catastrophizing Scale Short Form (PCS-SF), 2-item Patient Health Questionnaire (PHQ-2), Patients' Global Impression of Change (PGIC), Opinion About Treatment (OAT), Health Care Climate Questionnaire (HCCQ) and Expectations for Complementary and Alternative Medicine Treatments Short Form (EXPECT-SF).

| Session              | Summary of content                                                                                                                                                                                                                                                                                                                                          |
|----------------------|-------------------------------------------------------------------------------------------------------------------------------------------------------------------------------------------------------------------------------------------------------------------------------------------------------------------------------------------------------------|
| Visit 0              | <ul style="list-style-type: none"> <li>• Patient Information (T/E)</li> <li>• Study Consent (T/E)</li> <li>• Pre-Assessment (T/E)</li> <li>• Background Information (T/E)</li> <li>• Q-PLP (T/E)</li> <li>• PDI (T/E)</li> <li>• EQ5D-5L (T/E)</li> <li>• PSEQ-2 (T/E)</li> <li>• PCS-SF (T/E)</li> <li>• PHQ-2 (T/E)</li> <li>• EXPECT-SF (T/E)</li> </ul> |
| <b>Randomization</b> |                                                                                                                                                                                                                                                                                                                                                             |
| Visit 1              | <ul style="list-style-type: none"> <li>• Treatment session (T)</li> <li>• Q-PLP (E)</li> <li>• OAT (E)</li> <li>• EXPECT-SF (E)</li> <li>• HCCQ-SF (E)</li> </ul>                                                                                                                                                                                           |
| Visit 2-14           | <ul style="list-style-type: none"> <li>• Treatment session (T)</li> <li>• Q-PLP (E)</li> </ul>                                                                                                                                                                                                                                                              |
| Visit 15             | <ul style="list-style-type: none"> <li>• Treatment session (T)</li> <li>• Q-PLP (E)</li> <li>• PDI (E)</li> <li>• EQ5D-5L (E)</li> <li>• PSEQ-2 (E)</li> <li>• PCS-SF (E)</li> <li>• PHQ-2 (E)</li> <li>• PGIC (E)</li> <li>• HCCQ-SF (E)</li> </ul>                                                                                                        |
| 1-month follow-up    | <ul style="list-style-type: none"> <li>• Q-PLP (E)</li> <li>• PDI (E)</li> </ul>                                                                                                                                                                                                                                                                            |
| 3-month follow-up    | <ul style="list-style-type: none"> <li>• EQ5D-5L (E)</li> <li>• PSEQ-2 (E)</li> </ul>                                                                                                                                                                                                                                                                       |
| 6-month follow-up    | <ul style="list-style-type: none"> <li>• PCS-SF (E)</li> <li>• PHQ-2 (E)</li> </ul>                                                                                                                                                                                                                                                                         |

## Methods: Data collection, management and analysis



## Data collection and management

The monitor of the study (EL) is in charge of overseeing the progress of the RCT and ensuring that it is conducted, recorded, and reported in accordance with the protocol, Good Clinical Practice (GCP), and regulatory requirements.

The monitor supplies Case Report Forms (CRFs), which are filled in by the evaluator at each site. The evaluator is responsible to document all data obtained during the study which is identified by participant code number. This also applies to data for patients who, after having consented to participate, undergo the baseline examinations required for inclusion in the study, but who are not included. No items in the CRF are to be left unattended: if data are missing or are impossible to obtain, these should be documented as “not available” (NA) and the reasons for missing data must be noted in the document.

All data are recorded and stored in digital form on encrypted electronic devices. Documents containing links between a participant’s identity and their code number exist only in paper form and are kept in locked file cabinets with limited access at the investigation site where the participants have been treated. In accordance with the regulations issued by The Swedish Data Protection Authority, a personal register will be established.

The clinical investigators are responsible to probe, via discussion with the participant, for the occurrence of adverse events during each visit and record the information in the patient CRF. Adverse events must be described by duration (start and stop dates and times), severity, outcome, treatment and relation to study device, or if unrelated, the cause. The investigator must report any reportable event to the monitor in acceptable timely conditions, but not later than three working days after the occurrence of the event. The sponsor must report to the Medical Products Agency (Läkemedelsverket) any serious adverse event which indicates an imminent risk of death, serious injury, or serious illness and that requires prompt remedial action for other patients, users or other persons immediately, but not later than two working days after becoming aware of a new reportable event or of new information in relation to an already reported event.

Once all the data are collected, checked, and corrected, the database is closed and analyses performed. All data transfer, processing and analyses are done using depersonalised data and all the data sets are protected by password. In order to promote data quality, the evaluators are trained on all the data collection and management procedures and are provided with written instructions by the first (EL) and last (MO-C) authors.

To incentivise the completion of the follow-up, the patients are given the choice to participate in these assessments at the clinic or via a phone interview with the evaluators. When possible, follow-up assessments are also conducted with participants that had discontinued the treatment or withdrew from the study.

## Statistical methods

The main analysis will be performed in terms of change from baseline to the measurement at treatment completion using the ITT population. Complementary analyses will be performed on the Per Protocol (PP) population with respect to the change from baseline to the follow up assessments at 1,3 and 6 months after completion. Both the ITT population and the PP population will be specified in detail at the

Clean file meeting before the database lock and before breaking the code. The PP population will be restricted to the participants who successfully complete all 15 treatment sessions.

Suitable graphical and numerical summaries will be provided for all the variables measured and for corresponding changes in scores.

For the main unadjusted comparison between two groups, Fisher's non-parametric permutation test will be used for continuous variables, Mantel-Haenszel chi-square test for ordered categorical variables, Fisher's exact test for dichotomous variables and Pearson's chi-square test for non-ordered categorical variables. Confidence intervals at 95% for the mean differences between two groups will be given when appropriate. If significant differences exist between the two randomised groups between baseline variables that could influence the outcome variables, a complementary adjusted analysis will be performed for these baseline variables.

For adjusted comparison between two groups, analysis of covariance (ANCOVA) will be used for continuous outcome variables not obviously non-normally distributed with intervention/control as independent variable and all confounders as covariates.

For analysis of change within groups, Wilcoxon Signed rank test will be used for continuous variables and Sign test for ordered categorical and dichotomous variables. A complementary mixed model analysis between the two treatments regarding the primary efficacy variable with centre as random effect will be used to correct for the centre-effect in the statistical models.

All correlations will be performed with Spearman's correlation coefficient. The distribution of continuous variables will be given as mean, standard deviation, median, minimum and maximum, and distribution of categorical variables will be given as numbers and percentages. All statistical tests will be two-sided and conducted at the 5% significance level. The theory of sequential multiple test procedures will be applied for the primary analysis and for secondary analyses. If a test gives a significant result at the 5% significance level, the total test mass will be transferred to the following number in the test sequence until a non-significant result is achieved. All these significant tests will be considered confirmative. A Statistical Analysis Plan (SAP) will be written with all detailed statistical analyses specified.

## Ethics and dissemination

### Research ethics approval

There are no known risks associated with the experimental or control treatments and clinically significant deterioration is rare. Possible individual benefits include reduced phantom limb pain, reduced disability associated with pain, and improvement in various aspects related to quality of life. This trial has been approved by the governing ethical committees of each participating country. Important protocol modifications will be reported in a timely manner to all the relevant parties.

### Access to data

The principal investigator, MO-C, has full access to all of the data in the study except the documents containing the link between patient's identity and their code number, which will be accessible only after the completion of the data analyses. MO-C takes responsibility for the integrity of the data and the accuracy of the data analysis.

## Dissemination Policy

Regardless of the significance, direction, or magnitude of effect, the consortium will publish the findings of this study in scientific, peer-reviewed journals and conferences following the CONSORT guidelines. All the clinical investigators will author the scientific article reporting the results of the trial. No professional writers external to the study will be used aside from conventional English proof reading. Access to the detailed clinical investigation plan, participant-level dataset, and statistical code will be granted based on reasonable requests after the publication of the study.

## Trial status

This clinical trial is currently in the participant enrolment phase. Fourteen patients have been randomized and are under treatment at November 2017. It is anticipated that full analysis will be finalised in April 2020.

## References

- Bowering, K. J., Connell, N. E. O., Tabor, A., Catley, M. J., Leake, H. B., Moseley, G. L., et al. (2013). The Effects of Graded Motor Imagery and Its Components on Chronic Pain: A Systematic Review and Meta-Analysis. *J. Pain* 14, 3–13. doi:10.1016/j.jpain.2012.09.007.
- Chan, B. L., Witt, R., Charrow, A. P., Magee, A., Howard, R., Pasquina, P. F., et al. (2007). Mirror therapy for phantom limb pain. *N. Engl. J. Med.* 357, 2206–2207. doi:10.1056/NEJMc071927.
- Clark, R. L., Bowling, F. L., Jepson, F., and Rajbhandari, S. (2013). Phantom limb pain after amputation in diabetic patients does not differ from that after amputation in nondiabetic patients. *Pain* 154, 729–32. doi:10.1016/j.pain.2013.01.009.
- Dijkstra, P. U., Geertzen, J. H. B., Stewart, R., and van der Schans, C. P. (2002). Phantom pain and risk factors: a multivariate analysis. *J Pain Symptom Manag.* 24, 578–85. Available at: <http://www.ncbi.nlm.nih.gov/pubmed/12551807>.
- Ersland, L., Rosén, G., Lundervold, A., Smievoll, A. I., Tillung, T., Sundberg, H., et al. (1996). Phantom limb imaginary fingertapping causes primary motor cortex activation: an fMRI study. *Neuroreport* 8, 207–210. doi:10.1097/00001756-199612200-00042.
- Herdman, M., Gudex, C., Lloyd, A., Janssen, M., Kind, P., Parkin, D., et al. (2011). Development and preliminary testing of the new five-level version of EQ-5D (EQ-5D-5L). *Qual. Life Res.* 20, 1727–1736. doi:10.1007/s11136-011-9903-x.
- Hugdahl, K., Rosén, G., Ersland, L., Lundervold, A., Smievoll, A. I., Barndon, R., et al. (2001). Common pathways in mental imagery and pain perception: an fMRI study of a subject with an amputated arm. *Scand. J. Psychol.* 42, 269–75. Available at: <http://www.ncbi.nlm.nih.gov/pubmed/11501740> [Accessed February 24, 2017].
- Hurst, H., and Bolton, J. (2004). Assessing the clinical significance of change scores recorded on subjective outcome measures. *J. Manipulative Physiol. Ther.* 27, 26–35. doi:10.1016/j.jmpt.2003.11.003.
- Kroenke, K., Spitzer, R. L., and Williams, J. B. W. (2003). The Patient Health Questionnaire-2 Validity of a Two-Item Depression Screener. *Med. Care* 41, 1284–92. doi:10.1097/01.MLR.0000093487.78664.3C.
- Lendaro, E., Mastinu, E., Håkansson, B., and Ortiz-Catalan, M. (2017). Real-time classification of

- 1  
2  
3 non-weight bearing lower limb movements using EMG to facilitate phantom motor  
4 execution: engineering and case study application on phantom limb pain. *Front. Neurol.* 8,  
5 1–12. doi:10.3389/fneur.2017.00470.  
6  
7 Lotze, M., Flor, H., Grodd, W., Larbig, W., and Birbaumer, N. (2001). Phantom movements and  
8 pain. An fMRI study in upper limb amputees. *Brain* 124, 2268–77.  
9 doi:10.1093/brain/124.11.2268.  
10  
11 MacIver, K., Lloyd, D. M., Kelly, S., Roberts, N., and Nurmikko, T. (2008). Phantom limb pain,  
12 cortical reorganization and the therapeutic effect of mental imagery. *Brain* 131, 2181–91.  
13 doi:10.1093/brain/awn124.  
14  
15 McWilliams, L. A. A., Kowal, J., and Wilson, K. G. G. (2015). Development and evaluation of  
16 short forms of the Pain Catastrophizing Scale and the Pain Self-efficacy Questionnaire. *Eur.*  
17 *J. Pain (United Kingdom)* 19, 1342–1349. doi:10.1002/ejp.665.  
18  
19 Melzack, R. (1975). The McGill Pain Questionnaire: Major properties and scoring methods. *Pain*  
20 1, 277–299. doi:10.1016/0304-3959(75)90044-5.  
21  
22 Melzack, R. (1987). The short-form McGill pain questionnaire. *Pain* 30, 191–197.  
23 doi:10.1016/0304-3959(87)91074-8.  
24  
25 Moseley, G. L. (2006). Graded motor imagery for pathologic pain: A randomized controlled trial.  
26 *Neurology* 67, 2129–2134. doi:10.1212/01.wnl.0000249112.56935.32.  
27  
28 Nicholas, M. K. (2007). The pain self-efficacy questionnaire: Taking pain into account. *Eur. J.*  
29 *Pain* 11, 153–163. doi:10.1016/j.ejpain.2005.12.008.  
30  
31 Nicholas, M. K., McGuire, B. E., Asghari, A., Adams, J. H., Williams, Ac., Asghari, A., et al. (2015).  
32 A 2-item short form of the Pain Self-efficacy Questionnaire: development and  
33 psychometric evaluation of PSEQ-2. *J. Pain* 16, 153–63. doi:10.1016/j.jpain.2014.11.002.  
34  
35 Nikolajsen, L., and Jensen, T. S. (2001). Phantom limb pain. *Br J Anaesth* 87, 107–16.  
36  
37 Ortiz-Catalan, M., Brånemark, R., and Håkansson, B. (2013). BioPatRec: A modular research  
38 platform for the control of artificial limbs based on pattern recognition algorithms. *Source*  
39 *Code Biol. Med.* 8, 11. doi:10.1186/1751-0473-8-11.  
40  
41 Ortiz-Catalan, M., Guðmundsdóttir, R. A., Kristoffersen, M. B., Zepeda-Echavarria, A., Caine-  
42 Winterberger, K., Kulbacka-Ortiz, K., et al. (2016). Phantom motor execution facilitated by  
43 machine learning and augmented reality as treatment for Phantom Limb Pain. *Lancet* 388,  
44 2885–2894. doi:10.1016/S0140-6736(16)31598-7.  
45  
46 Ortiz-catalan, M., Håkansson, B., and Brånemark, R. (2014). Real-Time and Simultaneous  
47 Control of Artificial Limbs Based on Pattern Recognition Algorithms. 22, 756–764.  
48 doi:10.1109/TNSRE.2014.2305097.  
49  
50 Ortiz-Catalan, M., Sander, N., Kristoffersen, M. B., Håkansson, B., and Brånemark, R. (2014).  
51 Treatment of phantom limb pain (PLP) based on augmented reality and gaming controlled  
52 by myoelectric pattern recognition: A case study of a chronic PLP patient. *Front. Neurosci.*  
53 doi:10.3389/fnins.2014.00024.  
54  
55 Pollard, C. A. (1984). Preliminary validity study of the pain disability index. *Percept. Mot. Skills*  
56 59, 974. doi:10.2466/pms.1984.59.3.974.  
57  
58 Rosén, G., Hugdahl, K., Erslund, L., Lundervold, A., Smievoll, A. I., Barndon, R., et al. (2001).  
59 Different brain areas activated during imagery of painful and non-painful “finger  
60 movements” in a subject with an amputated arm. *Neurocase* 7, 255–60.  
doi:10.1093/neucas/7.3.255.

- 1  
2  
3 Roux, F. E., Ibarrola, D., Lazorthes, Y., and Berry, I. (2001). Virtual movements activate primary  
4 sensorimotor areas in amputees: report of three cases. *Neurosurgery* 49, 736-41–2.  
5 Available at: <http://www.ncbi.nlm.nih.gov/pubmed/11523688> [Accessed February 24,  
6 2017].  
7  
8 Roux, F. E., Lotterie, J. A., Cassol, E., Lazorthes, Y., Sol, J. C., Berry, I., et al. (2003). Cortical Areas  
9 Involved in Virtual Movement of Phantom Limbs: Comparison with Normal Subjects.  
10 *Neurosurgery* 53, 1342–1353. doi:10.1227/01.NEU.0000093424.71086.8F.  
11  
12 Saghaei, M. (2011). Implementation of an open-source customizable minimization program for  
13 allocation of patients to parallel groups in clinical trials. *J. Biomed. Sci. Eng.* 4, 734–739.  
14 doi:10.4236/jbise.2011.411090.  
15  
16 Simon, A. M., Hargrove, L. J., Lock, B. A., and Kuiken, T. A. (2011). Target Achievement Control  
17 Test: evaluating real-time myoelectric pattern-recognition control of multifunctional  
18 upper-limb prostheses. *J. Rehabil. Res. Dev.* 48, 619–27. doi:10.1682/JRRD.2010.08.0149.  
19  
20 Spitzer, R. L., Kroenke, K., and Williams, J. B. W. (1999). Validation and Utility of a Self-report  
21 Version of PRIME-MD. *J. Am. Med. Assoc.* 282, 1737–1744. doi:10.1001/jama.282.18.1737.  
22  
23 Sullivan, M. J. L., Bishop, S. R., and Pivik, J. (1995). The Pain Catastrophizing Scale: Development  
24 and validation. *Psychol. Assess.* 7, 524–532. doi:10.1037/1040-3590.7.4.524.  
25  
26 Sullivan, M. J., Thorn, B., Haythornthwaite, J. A., Keefe, F., Martin, M., Bradley, L. A., et al.  
27 (2001). Theoretical perspectives on the relation between catastrophizing and pain. *Clin. J.*  
28 *Pain* 17, 52–64. doi:10.1097/00002508-200103000-00008.  
29  
30 Williams, G. C., Freedman, Z. R., and Deci, E. L. (1998). Supporting Autonomy to Motivate  
31 Patients With Diabetes for Glucose Control. *Diabetes Care* 21, 1644–1651.  
32  
33

## Figure legends

34 Figure 1: Flow diagram for the randomized controlled clinical trial. At least sixty-seven patients are  
35 recruited and randomly allocated to either Phantom Motor Execution (PME) or Phantom Motor Imagery  
36 (PMI) interventions in allocation ratio 2:1. Following the completion of the treatment protocol and  
37 wash-out period of six months it is possible for the patient to cross over to the parallel interventional  
38 arm, according to their will.  
39

40 Figure 2: Schematic illustration of the clinical investigation device with all its components. Myoelectric  
41 signals are acquired through surface electrodes (A) by a myoelectric amplifier (B), electrically isolated (C).  
42 The signals are then processed by the software installed on the computer (D). The camera (E) films the  
43 participant and the recorded image is displayed on the monitor (F) with a virtual limb superimposed  
44 where the marker (G) is detected. Figure courtesy of Jason Millenaar.  
45  
46  
47  
48  
49  
50  
51  
52  
53  
54  
55  
56  
57  
58

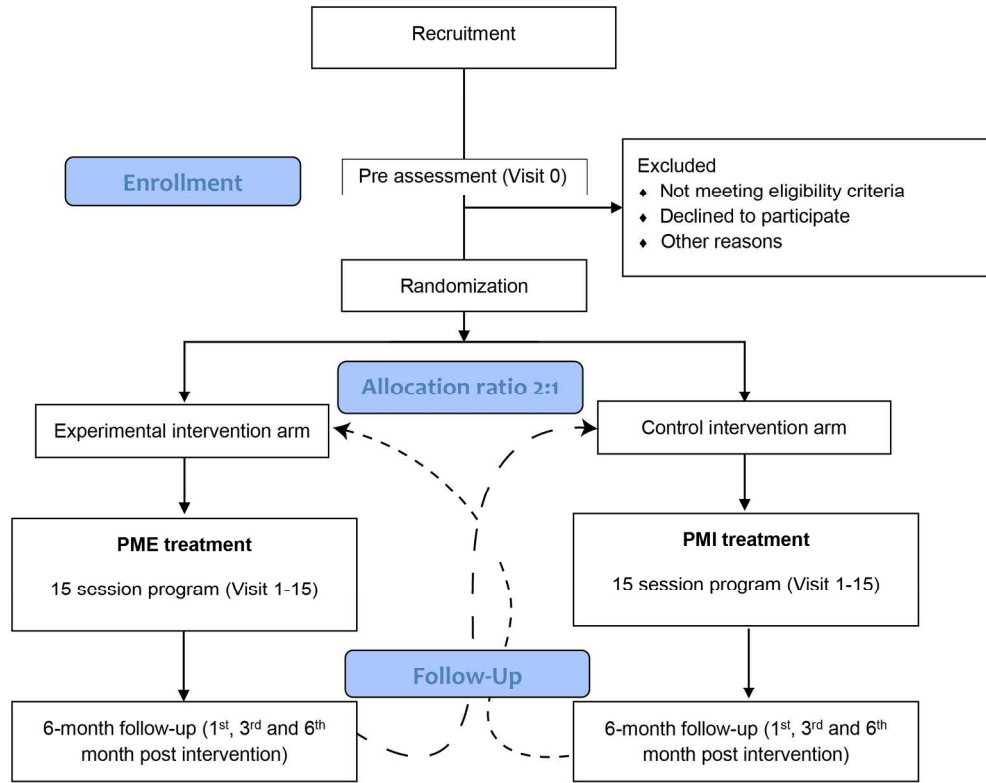

Figure 1: Flow diagram for the randomized controlled clinical trial. At least sixty-seven patients are recruited and randomly allocated to either Phantom Motor Execution (PME) or Phantom Motor Imagery (PMI) interventions in allocation ratio 2:1. Following the completion of the treatment protocol and wash-out period of six months it is possible for the patient to cross over to the parallel interventional arm, according to their will.

571x451mm (96 x 96 DPI)

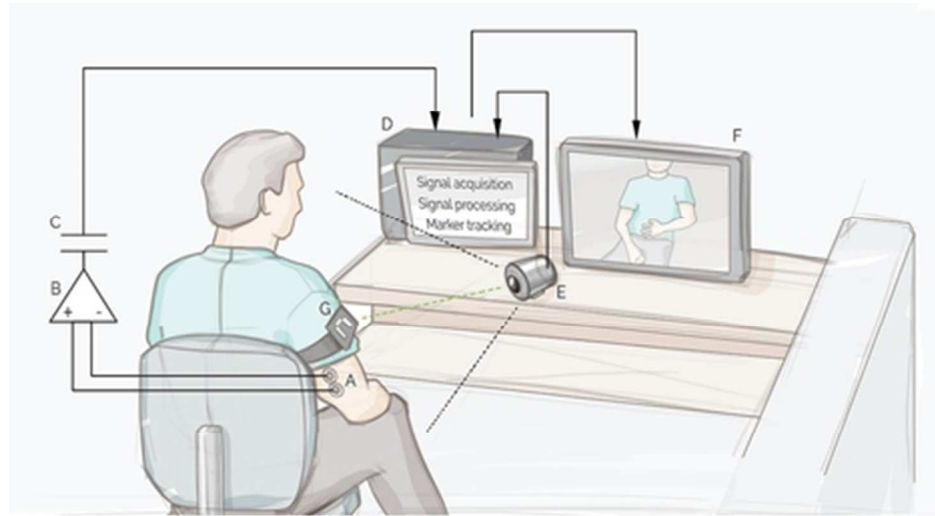

Figure 2: Schematic illustration of the clinical investigation device with all its components. Myoelectric signals are acquired through surface electrodes (A) by a myoelectric amplifier (B), electrically isolated (C). The signals are then processed by the software installed on the computer (D). The camera (E) films the participant and the recorded image is displayed on the monitor (F) with a virtual limb superimposed where the marker (G) is detected. Figure courtesy of Jason Millenaar.

39x22mm (300 x 300 DPI)

## PARTICIPANT INFORMATION SHEET

### 1. Introduction

**Title of Project:** Virtual Reality as a Treatment for Phantom Limb Pain – A Randomised Controlled Trial

### 2 Invitation

You are being invited to take part in a research study investigating the effect of two different forms of virtual motor training as a treatment for phantom pain. Before you decide, it is important for you to understand why the research is being done and what it will involve. This *Participant Information Sheet* will tell you about the purpose, risks and benefits of this research study. If you agree to take part, we will ask you to sign a Consent Form. If there is anything that you are not clear about, we will be happy to explain it to you. Please take as much time as you need to read it. You should only consent to participate in this research study when you feel that you understand what is being asked of you, and you have had enough time to think about your decision. Thank you for reading this.

### 3 Purpose of the Study

Phantom pain occurs in about 70-80% of all amputees and many continue to feel the lost body part which is called phantom arm or phantom leg. Some individuals feel that they can move their phantom arms or legs while others feel that the phantom limb is immobile and very painful. Although there are many different ways to treat phantom limb pain, there is still no satisfactory treatment to help all patients. During the last decade, TENS and mirror therapy have started to be used to treat phantom limb pain. A further development has taken place with the help of modern computer technology which enables the training of the amputated body part in a virtual reality. The method involves performing virtual motor training exercises i.e. patients learn to move an image of their phantom arm or leg and this is believed to stimulate repair mechanisms in the brain. We aim to investigate whether two different variants of this new technology effectively reduce phantom pain in amputees.

### 4 Study Design

The study is a randomized, controlled clinical trial. This means that the you have been randomly assigned to one of two groups that will receive different treatments for phantom limb. Both treatment methods are believed to be effective but we will examine if there is something in one of the two methods more effective than the other. If the current treatment does not give you any improvement, you'll be able to undergo the second form of treatment, if you wish, after completion of the first programme.

### 5 Taking part – what it involves

#### *What will happen to me if I take part?*

In the treatment, adhesive electrodes will be used: these will be attached to the skin on your stump. With these electrodes, signals from the stump muscles can be recorded. When the virtual arm or leg on the screen moves, you should either imagine or perform the same movements with your own phantom arm or leg. Activity in the stump muscles is recorded via the adhesive pads. The training also includes various computer games that are controlled by the system.



1  
2  
3 There are several possible explanatory mechanisms for the analgesic effect that can be achieved  
4 with virtual motor training. It is believed that the areas of the brain required for movements in the  
5 amputated arm are partially reactivated. The patient receives visual feedback that tricks the brain  
6 into thinking that there is an arm that receives the brain's movement commands. After each  
7 treatment, you will be asked to answer questions about how you experience phantom pain. At the  
8 first and last treatment session, you will also answer questions about how you experience your  
9 health overall. Individual interviews will be conducted on a sample of the study participants after  
10 treatment. The objective of the qualitative part is to explore how individuals experienced the  
11 treatment, and if and how this is perceived to have affected their health in general. To investigate  
12 whether the treatment has a lasting effect, you will be called for examination 1, 3 and 6 months  
13 after treatment.  
14

### 15 *Do I have to take part?*

16 It is up to you to decide whether or not to take part. If you do decide to take part you will be given  
17 this information sheet to keep and be asked to sign a consent form, a copy of which you can also  
18 keep. If you decide to take part, you are still free to withdraw at any time and without giving a  
19 reason. A decision to withdraw at any time, or a decision not to take part, will not affect your rights  
20 in any way.  
21

### 22 *How long will my part in the study last?*

23 There will be a total of 15 treatment sessions that last about 2 hours each. You can choose to receive  
24 the treatment one, two or five times a week.  
25

### 26 *What are the possible benefits in taking part?*

27 If the treatment has the effect we expect, your phantom pain is likely to decrease. In the unlikely  
28 event that the treatment does not produce results, you will get the opportunity to try the other  
29 treatment option after the completion of the long-term follow-up.  
30

### 31 *What are the possible disadvantages and risks of taking part?*

32 All elements of the study are done under safe conditions by trained and skilled staff and you will not  
33 be exposed to any risks associated with either treatment or evaluation. If you come into the  
34 treatment group that uses the stump muscles during exercise, you may experience tiredness in your  
35 muscles at the beginning of treatment. This, however, is transient.  
36

### 37 *What happens at the end of the study?*

38 When the long-term follow-up is completed, you will have the opportunity to have a copy of your  
39 own results. On request, you can also get information about the overall results of the study. The  
40 study and its results will be announced by publication in international scientific journals.  
41

### 42 *What happens if I change my mind during the study?*

43 You are entitled to change your mind about participating in this at any time without disadvantage or  
44 penalty. If you decide to withdraw, all your data will be destroyed and will not be used in the study.  
45

## 46 **6 Confidentiality**

47 All information that is collected about you during the course of the research will be kept strictly  
48 confidential and will not be shared with anyone else. The information collected in this research study  
49 will be stored in a way that protects your identity.  
50

51 Information obtained during this study will be compiled with the help of a computer to analyze the  
52 results. The information is treated as confidential and will be stored for 10 years. All data processing  
53  
54  
55  
56  
57  
58  
59

1  
2  
3 will be done with coded identity (individuals cannot be recognized from their data) and the results  
4 will be presented in a way in which no individual can be identified. Your personal information is  
5 securely protected and cannot be accessed by unauthorized persons. The identity code concerning  
6 research participants will be kept securely at the project leader's site.  
7

## 8 7 Responsible for the investigations 9

### 10 **Coordinating Investigator:**

11 Max Ortiz Catalan, Chalmers University of Technology, Institution for Electrical Engineering, 412 96  
12 Gothenburg.

13 E-mail: [maxo@chalmers.se](mailto:maxo@chalmers.se)

14 **Tel: + 46 (0) 708 46 10 65**  
15  
16  
17

18 Thank you for taking the time to read this information sheet.  
19  
20  
21  
22  
23  
24  
25  
26  
27  
28  
29  
30  
31  
32  
33  
34  
35  
36  
37  
38  
39  
40  
41  
42  
43  
44  
45  
46  
47  
48  
49  
50  
51  
52  
53  
54  
55  
56  
57  
58  
59  
60

## Appendix B – Extended Methods

### Interventions

Possible phantom movement for upper limb amputees are hand open and close, pronation and supination, wrist flexion and extension, elbow flexion and extension, flexion and extension of the individual fingers. Possible movements for lower limb amputees are knee extension and flexion, femoral rotation outwards and inwards, ankle plantar flexion and dorsiflexion, tibial rotation outwards and inwards, ankle eversion and inversion, flexion and extension of the toes. Upper and lower limb movements can be performed individually and simultaneously (more than two movements at the same time). Depending on the level of amputation, some movements are omitted from the treatment because they involve the residual rather than the phantom limb: e.g. elbow movements in transradial amputees. According to whether the subjects are assigned to the control or experimental intervention, they are asked to either imagine or execute these phantom movements as naturally and intuitively as possible.

### Experimental Treatment

A Phantom Motor Execution (PME) treatment session consists of the following components:

1. **Placement of electrodes and fiducial marker.** To place the electrode in an appropriate way, subjects are asked to execute different phantom movements while the stump is palpated to localize the muscles. Areas with excess of soft-tissue between muscles and skin are avoided. Four to eight bipolar superficial electrodes (pre-gelled, adhesive, Ag/AgCl, one cm diameter, and two cm inter-electrode distance) are then placed along the muscle fibres where possible, else one electrode is placed on the target muscle while the other is placed on a more electrically neutral area. In the case of transfemoral amputations, electrodes are placed according to the *targeted monopolar configuration* described in detail in reference: (Lendaro et al., 2017).
2. **PME training cycle** (see Figure B1)
  - a. **Recording session.** The subjects are asked to perform three repetitions of the movements as shown by a virtual limb alternated by rest periods. The standard contraction time is set to three seconds followed by three seconds of relaxation. However, this time might be increased in case longer time is required to complete the phantom movement. This step is necessary to collect myoelectric data used to train the motor volition decoding algorithms. The movements performed are dictated by the current level of difficulty (see “Levels of difficulty”).
  - b. **Phantom motor execution in augmented reality (AR).** The subjects are then asked to control the virtual limb by performing the movements previously trained.
  - c. **Serious gaming.** Each phantom movement trained during the recording session is then paired to activate a specific key on the computer keyboard. Computer games that would normally be controlled by those keys can then be controlled by the phantom movements, enabling the control of the game through *phantom motor execution*.
  - d. **Target achievement control (TAC) test.** In this part of the training cycle the subjects are asked to move a virtual limb aiming to match a target posture determined by the movements previously trained. The target posture is considered achieved when the subject is able to position the virtual limb within  $\pm 5$  degrees range in less than 20 seconds, and hold it for a two-second dwell interval. The trained movements are randomly requested six times each. This test was originally designed to evaluate control strategies for multi-functional prosthetic devices represented in virtual reality (Simon et al., 2011) In this study, the TAC test is used only for rehabilitation purposes and it is used as implemented in our open source platform named BioPatRec (Ortiz-Catalan et al., 2013).

3. **Outcomes evaluation.** Depending on the specific visit different outcome measures are recorded by blind evaluators at the end of the treatment, as reported in Table 2.

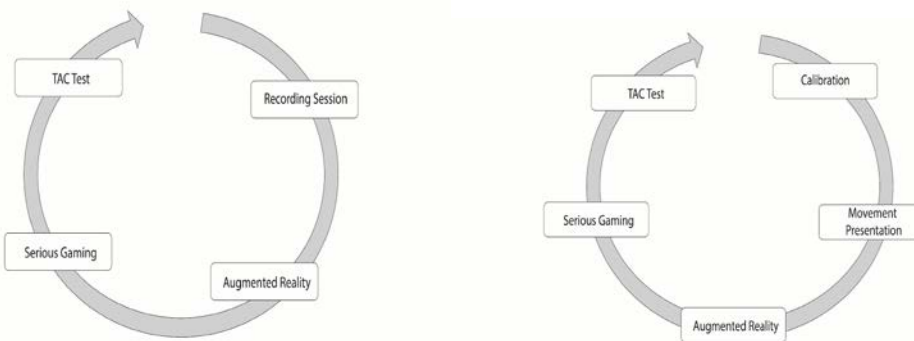

Figure B1: Training cycle for the Phantom Motor Execution (PME) intervention (left) and Phantom Motor Imagery (PMI) intervention (right)

### Control Treatment

A Phantom Motor Imagery (PMI) treatment session consists of the same components as the experimental intervention, however there are some differences in the treatment cycle (see Figure B1), which are listed below:

- **Calibration.** The training cycle starts with the calibration. During this step, the patient is asked to relax the muscles completely and stay still. This phase is required in order to set the relaxation or “non-activity” level and enable the detection of contractions associated with unwanted motor execution.
- **Movement presentation.** This step is the analogue of the recording session in the experimental treatment and is meant to present a sequence of selected movements to the subject. The movements are chosen based on an increasing level of difficulty (see “Levels of difficulty”). Every movement is presented three times, for a period of three seconds in each repetition, and alternated by rest periods of equal length. During this phase the subject is asked to practice the imagination of the movements.
- **Serious gaming.** In the gaming step, the subjects will control the game using the keyboard with an able limb. No imagination is required for this step. However, the patient is expected to engage in an entertaining activity and divert cognitive resources that would be otherwise devoted to pain processing. Bilateral upper limb amputees will use a joystick with any able limb.
- **Phantom motor execution in augmented reality (AR) and TAC test.** The subjects are asked to imagine being in control of the movements autonomously performed by the virtual limb in both AR and VR environments.

### Levels of difficulty

Interventions can be performed at five levels of difficulty. Subjects start at the easiest level and advance to the next level following different modalities depending on their intervention group. Subjects assigned to the PME group move to the next level when they achieve 85%-100% completion rate in the TAC test. If subjects are unable to achieve over 30% of completion rate in the new level, they are advised to move back to the previous level. On the other hand, subjects assigned to the PMI group are instructed on the specific amount of time to spend in each level, which increases with the number of degrees of freedom (DoF) exercised within the same treatment cycle.

- Level 1: Individual movements (1 DoF).

- Level 2: Individual movements (2 DoF). In the second level more than two movements are requested within the same training cycle while keeping each movement independent.
- Level 3: Simultaneous movements (2 DoF). Subjects are required to combine more than one DoF, i.e. pronation while opening or closing the hand, or supination while opening or closing the hand.
- Level 4: Individual movements (3 DoF).
- Level 5: Simultaneous movements (3 DoF).

For peer review only

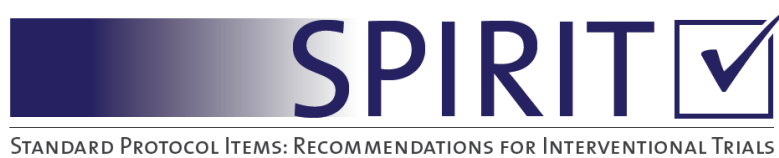

SPIRIT 2013 Checklist: Recommended items to address in a clinical trial protocol and related documents\*

| Section/item                      | ItemNo | Description                                                                                                                                                                                                                                                                              | Page  |
|-----------------------------------|--------|------------------------------------------------------------------------------------------------------------------------------------------------------------------------------------------------------------------------------------------------------------------------------------------|-------|
| <b>Administrative information</b> |        |                                                                                                                                                                                                                                                                                          |       |
| Title                             | 1      | Descriptive title identifying the study design, population, interventions, and, if applicable, trial acronym                                                                                                                                                                             | 1     |
| Trial registration                | 2a     | Trial identifier and registry name. If not yet registered, name of intended registry                                                                                                                                                                                                     | 2     |
|                                   | 2b     | All items from the World Health Organization Trial Registration Data Set                                                                                                                                                                                                                 | 3-5   |
| Protocol version                  | 3      | Date and version identifier                                                                                                                                                                                                                                                              | 5     |
| Funding                           | 4      | Sources and types of financial, material, and other support                                                                                                                                                                                                                              | 5     |
| Roles and responsibilities        | 5a     | Names, affiliations, and roles of protocol contributors                                                                                                                                                                                                                                  | 5     |
|                                   | 5b     | Name and contact information for the trial sponsor                                                                                                                                                                                                                                       | 5     |
|                                   | 5c     | Role of study sponsor and funders, if any, in study design; collection, management, analysis, and interpretation of data; writing of the report; and the decision to submit the report for publication, including whether they will have ultimate authority over any of these activities | 5     |
|                                   | 5d     | Composition, roles, and responsibilities of the coordinating centre, steering committee, endpoint adjudication committee, data management team, and other individuals or groups overseeing the trial, if applicable (see Item 21a for data monitoring committee)                         | 5, 17 |
| <b>Introduction</b>               |        |                                                                                                                                                                                                                                                                                          |       |
| Background and rationale          | 6a     | Description of research question and justification for undertaking the trial, including summary of relevant studies (published and unpublished) examining benefits and harms for each intervention                                                                                       | 6,7   |
|                                   | 6b     | Explanation for choice of comparators                                                                                                                                                                                                                                                    | 7     |

|                                                           |     |                                                                                                                                                                                                                                                                                                                                                                                |                 |
|-----------------------------------------------------------|-----|--------------------------------------------------------------------------------------------------------------------------------------------------------------------------------------------------------------------------------------------------------------------------------------------------------------------------------------------------------------------------------|-----------------|
| Objectives                                                | 7   | Specific objectives or hypotheses                                                                                                                                                                                                                                                                                                                                              | 7               |
| Trial design                                              | 8   | Description of trial design including type of trial (eg, parallel group, crossover, factorial, single group), allocation ratio, and framework (eg, superiority, equivalence, noninferiority, exploratory)                                                                                                                                                                      | 8               |
| <b>Methods: Participants, interventions, and outcomes</b> |     |                                                                                                                                                                                                                                                                                                                                                                                |                 |
| Study setting                                             | 9   | Description of study settings (eg, community clinic, academic hospital) and list of countries where data will be collected. Reference to where list of study sites can be obtained                                                                                                                                                                                             | 8               |
| Eligibility criteria                                      | 10  | Inclusion and exclusion criteria for participants. If applicable, eligibility criteria for study centres and individuals who will perform the interventions (eg, surgeons, psychotherapists)                                                                                                                                                                                   | 8,9             |
| Interventions                                             | 11a | Interventions for each group with sufficient detail to allow replication, including how and when they will be administered                                                                                                                                                                                                                                                     | 8-9, Appendix B |
|                                                           | 11b | Criteria for discontinuing or modifying allocated interventions for a given trial participant (eg, drug dose change in response to harms, participant request, or improving/worsening disease)                                                                                                                                                                                 | 12              |
|                                                           | 11c | Strategies to improve adherence to intervention protocols, and any procedures for monitoring adherence (eg, drug tablet return, laboratory tests)                                                                                                                                                                                                                              | 8               |
|                                                           | 11d | Relevant concomitant care and interventions that are permitted or prohibited during the trial                                                                                                                                                                                                                                                                                  | 9               |
| Outcomes                                                  | 12  | Primary, secondary, and other outcomes, including the specific measurement variable (eg, systolic blood pressure), analysis metric (eg, change from baseline, final value, time to event), method of aggregation (eg, median, proportion), and time point for each outcome. Explanation of the clinical relevance of chosen efficacy and harm outcomes is strongly recommended | 12-14           |
| Participant timeline                                      | 13  | Time schedule of enrolment, interventions (including any run-ins and washouts), assessments, and visits for participants. A schematic diagram is highly recommended (see Figure)                                                                                                                                                                                               | 10,16           |

|                                                                     |     |                                                                                                                                                                                                                                                                                                                                                                                                              |    |
|---------------------------------------------------------------------|-----|--------------------------------------------------------------------------------------------------------------------------------------------------------------------------------------------------------------------------------------------------------------------------------------------------------------------------------------------------------------------------------------------------------------|----|
| Sample size                                                         | 14  | Estimated number of participants needed to achieve study objectives and how it was determined, including clinical and statistical assumptions supporting any sample size calculations                                                                                                                                                                                                                        | 14 |
| Recruitment                                                         | 15  | Strategies for achieving adequate participant enrolment to reach target sample size                                                                                                                                                                                                                                                                                                                          | 8  |
| <b>Methods: Assignment of interventions (for controlled trials)</b> |     |                                                                                                                                                                                                                                                                                                                                                                                                              |    |
| Allocation:                                                         |     |                                                                                                                                                                                                                                                                                                                                                                                                              |    |
| Sequence generation                                                 | 16a | Method of generating the allocation sequence (eg, computer-generated random numbers), and list of any factors for stratification. To reduce predictability of a random sequence, details of any planned restriction (eg, blocking) should be provided in a separate document that is unavailable to those who enrol participants or assign interventions                                                     | 14 |
| Allocation concealment mechanism                                    | 16b | Mechanism of implementing the allocation sequence (eg, central telephone; sequentially numbered, opaque, sealed envelopes), describing any steps to conceal the sequence until interventions are assigned                                                                                                                                                                                                    | 14 |
| Implementation                                                      | 16c | Who will generate the allocation sequence, who will enrol participants, and who will assign participants to interventions                                                                                                                                                                                                                                                                                    | 14 |
| Blinding (masking)                                                  | 17a | Who will be blinded after assignment to interventions (eg, trial participants, care providers, outcome assessors, data analysts), and how                                                                                                                                                                                                                                                                    | 15 |
|                                                                     | 17b | If blinded, circumstances under which unblinding is permissible, and procedure for revealing a participant's allocated intervention during the trial                                                                                                                                                                                                                                                         | 17 |
| <b>Methods: Data collection, management, and analysis</b>           |     |                                                                                                                                                                                                                                                                                                                                                                                                              |    |
| Data collection methods                                             | 18a | Plans for assessment and collection of outcome, baseline, and other trial data, including any related processes to promote data quality (eg, duplicate measurements, training of assessors) and a description of study instruments (eg, questionnaires, laboratory tests) along with their reliability and validity, if known. Reference to where data collection forms can be found, if not in the protocol | 17 |



|                                 |     |                                                                                                                                                                                                                                                                                                                                       |           |
|---------------------------------|-----|---------------------------------------------------------------------------------------------------------------------------------------------------------------------------------------------------------------------------------------------------------------------------------------------------------------------------------------|-----------|
|                                 | 18b | Plans to promote participant retention and complete follow-up, including list of any outcome data to be collected for participants who discontinue or deviate from intervention protocols                                                                                                                                             | 13        |
| Data management                 | 19  | Plans for data entry, coding, security, and storage, including any related processes to promote data quality (eg, double data entry; range checks for data values). Reference to where details of data management procedures can be found, if not in the protocol                                                                     | 17        |
| Statistical methods             | 20a | Statistical methods for analysing primary and secondary outcomes. Reference to where other details of the statistical analysis plan can be found, if not in the protocol                                                                                                                                                              | 17,18     |
|                                 | 20b | Methods for any additional analyses (eg, subgroup and adjusted analyses)                                                                                                                                                                                                                                                              | 17,18     |
|                                 | 20c | Definition of analysis population relating to protocol non-adherence (eg, as randomised analysis), and any statistical methods to handle missing data (eg, multiple imputation)                                                                                                                                                       | 12, 17,18 |
| <b>Methods: Monitoring</b>      |     |                                                                                                                                                                                                                                                                                                                                       |           |
| Data monitoring                 | 21a | Composition of data monitoring committee (DMC); summary of its role and reporting structure; statement of whether it is independent from the sponsor and competing interests; and reference to where further details about its charter can be found, if not in the protocol. Alternatively, an explanation of why a DMC is not needed | NA        |
|                                 | 21b | Description of any interim analyses and stopping guidelines, including who will have access to these interim results and make the final decision to terminate the trial                                                                                                                                                               | NA        |
| Harms                           | 22  | Plans for collecting, assessing, reporting, and managing solicited and spontaneously reported adverse events and other unintended effects of trial interventions or trial conduct                                                                                                                                                     | 17        |
| Auditing                        | 23  | Frequency and procedures for auditing trial conduct, if any, and whether the process will be independent from investigators and the sponsor                                                                                                                                                                                           | 17        |
| <b>Ethics and dissemination</b> |     |                                                                                                                                                                                                                                                                                                                                       |           |

|                                              |                               |     |                                                                                                                                                                                                                                                                                     |            |
|----------------------------------------------|-------------------------------|-----|-------------------------------------------------------------------------------------------------------------------------------------------------------------------------------------------------------------------------------------------------------------------------------------|------------|
| 1<br>2<br>3<br>4<br>5                        | Research ethics approval      | 24  | Plans for seeking research ethics committee/institutional review board (REC/IRB) approval                                                                                                                                                                                           | 18         |
| 6<br>7<br>8<br>9<br>10<br>11                 | Protocol amendments           | 25  | Plans for communicating important protocol modifications (eg, changes to eligibility criteria, outcomes, analyses) to relevant parties (eg, investigators, REC/IRBs, trial participants, trial registries, journals, regulators)                                                    | 18         |
| 12<br>13<br>14<br>15                         | Consent or assent             | 26a | Who will obtain informed consent or assent from potential trial participants or authorised surrogates, and how (see Item 32)                                                                                                                                                        | 8          |
| 16<br>17<br>18<br>19<br>20                   |                               | 26b | Additional consent provisions for collection and use of participant data and biological specimens in ancillary studies, if applicable                                                                                                                                               | NA         |
| 21<br>22<br>23<br>24<br>25                   | Confidentiality               | 27  | How personal information about potential and enrolled participants will be collected, shared, and maintained in order to protect confidentiality before, during, and after the trial                                                                                                | 17         |
| 26<br>27<br>28                               | Declaration of interests      | 28  | Financial and other competing interests for principal investigators for the overall trial and each study site                                                                                                                                                                       | 6          |
| 29<br>30<br>31<br>32                         | Access to data                | 29  | Statement of who will have access to the final trial dataset, and disclosure of contractual agreements that limit such access for investigators                                                                                                                                     | 17,18      |
| 33<br>34<br>35<br>36<br>37                   | Ancillary and post-trial care | 30  | Provisions, if any, for ancillary and post-trial care, and for compensation to those who suffer harm from trial participation                                                                                                                                                       | 8          |
| 38<br>39<br>40<br>41<br>42<br>43<br>44       | Dissemination policy          | 31a | Plans for investigators and sponsor to communicate trial results to participants, healthcare professionals, the public, and other relevant groups (eg, via publication, reporting in results databases, or other data sharing arrangements), including any publication restrictions | 18         |
| 45<br>46<br>47                               |                               | 31b | Authorship eligibility guidelines and any intended use of professional writers                                                                                                                                                                                                      | 19         |
| 48<br>49<br>50                               |                               | 31c | Plans, if any, for granting public access to the full protocol, participant-level dataset, and statistical code                                                                                                                                                                     | 19         |
| 51<br>52                                     | <b>Appendices</b>             |     |                                                                                                                                                                                                                                                                                     |            |
| 53<br>54<br>55<br>56<br>57<br>58<br>59<br>60 | Informed consent materials    | 32  | Model consent form and other related documentation given to participants and authorised surrogates                                                                                                                                                                                  | Appendix A |

|                                                                                                                                                                                                                                                                                                                                                             |                      |    |                                                                                                                                                                                                |    |
|-------------------------------------------------------------------------------------------------------------------------------------------------------------------------------------------------------------------------------------------------------------------------------------------------------------------------------------------------------------|----------------------|----|------------------------------------------------------------------------------------------------------------------------------------------------------------------------------------------------|----|
| 1<br>2<br>3<br>4<br>5<br>6<br>7<br>8<br>9<br>10<br>11<br>12<br>13<br>14<br>15<br>16<br>17<br>18<br>19<br>20<br>21<br>22<br>23<br>24<br>25<br>26<br>27<br>28<br>29<br>30<br>31<br>32<br>33<br>34<br>35<br>36<br>37<br>38<br>39<br>40<br>41<br>42<br>43<br>44<br>45<br>46<br>47<br>48<br>49<br>50<br>51<br>52<br>53<br>54<br>55<br>56<br>57<br>58<br>59<br>60 | Biological specimens | 33 | Plans for collection, laboratory evaluation, and storage of biological specimens for genetic or molecular analysis in the current trial and for future use in ancillary studies, if applicable | NA |
|-------------------------------------------------------------------------------------------------------------------------------------------------------------------------------------------------------------------------------------------------------------------------------------------------------------------------------------------------------------|----------------------|----|------------------------------------------------------------------------------------------------------------------------------------------------------------------------------------------------|----|

\*It is strongly recommended that this checklist be read in conjunction with the SPIRIT 2013 Explanation & Elaboration for important clarification on the items. Amendments to the protocol should be tracked and dated. The SPIRIT checklist is copyrighted by the SPIRIT Group under the Creative Commons "[Attribution-NonCommercial-NoDerivs 3.0 Unported](https://creativecommons.org/licenses/by-nc-nd/3.0/)" license.

For peer review only

# BMJ Open

## Phantom Motor Execution as a treatment for Phantom Limb Pain: Protocol of an international, double-blind, randomised, controlled clinical trial.

|                                 |                                                                                                                                                                                                                                                                                                                                                                                                                                                                                                                                                                                                                                                                                                                                                                                                                                                                                                                                                                                                                                                                                                                                                                                                                                                                                                                                                                                                                                                                                                                                                                                                           |
|---------------------------------|-----------------------------------------------------------------------------------------------------------------------------------------------------------------------------------------------------------------------------------------------------------------------------------------------------------------------------------------------------------------------------------------------------------------------------------------------------------------------------------------------------------------------------------------------------------------------------------------------------------------------------------------------------------------------------------------------------------------------------------------------------------------------------------------------------------------------------------------------------------------------------------------------------------------------------------------------------------------------------------------------------------------------------------------------------------------------------------------------------------------------------------------------------------------------------------------------------------------------------------------------------------------------------------------------------------------------------------------------------------------------------------------------------------------------------------------------------------------------------------------------------------------------------------------------------------------------------------------------------------|
| Journal:                        | <i>BMJ Open</i>                                                                                                                                                                                                                                                                                                                                                                                                                                                                                                                                                                                                                                                                                                                                                                                                                                                                                                                                                                                                                                                                                                                                                                                                                                                                                                                                                                                                                                                                                                                                                                                           |
| Manuscript ID                   | bmjopen-2017-021039.R1                                                                                                                                                                                                                                                                                                                                                                                                                                                                                                                                                                                                                                                                                                                                                                                                                                                                                                                                                                                                                                                                                                                                                                                                                                                                                                                                                                                                                                                                                                                                                                                    |
| Article Type:                   | Protocol                                                                                                                                                                                                                                                                                                                                                                                                                                                                                                                                                                                                                                                                                                                                                                                                                                                                                                                                                                                                                                                                                                                                                                                                                                                                                                                                                                                                                                                                                                                                                                                                  |
| Date Submitted by the Author:   | 27-Mar-2018                                                                                                                                                                                                                                                                                                                                                                                                                                                                                                                                                                                                                                                                                                                                                                                                                                                                                                                                                                                                                                                                                                                                                                                                                                                                                                                                                                                                                                                                                                                                                                                               |
| Complete List of Authors:       | <p>Lendaro, Eva; Chalmers tekniska hogskola, Electrical Engineering<br/> Hermansson, Liselotte; University Health Care Research Centre, Faculty of Medicine and Health, Örebro University; Department of Prosthetics and Orthotics, Faculty of Medicine and Health, Örebro University Hospital,<br/> Burger, Helena; University Rehabilitation Institute; University of Ljubljana, Faculty of Medicine<br/> Van der Sluis, Corry; University of Groningen, University Medical Center Groningen, Rehabilitation Medicine<br/> McGuire, Brian; National University of Ireland, Galway, Ireland, School of Psychology &amp; Centre for Pain Research<br/> Pilch, Monika; National University of Ireland, Galway, Ireland, School of Psychology &amp; Centre for Pain Research<br/> Bunketorp-Käll, Lina; Sahlgrenska University Hospital, Centre for Advanced Reconstruction of Extremities<br/> Kulbacka-Ortiz, Katarzyna; Sahlgrenska University Hospital, Centre for Advanced Reconstruction of Extremities<br/> Rignér, Ingrid ; Sahlgrenska universitetssjukhuset, Gåskolan/Ortopedteknik<br/> Stockselius, Anita; Rehabcenter Sfären, Bräcke Diakoni<br/> Gudmundson, Lena; Rehabcenter Sfären, Bräcke Diakoni<br/> Widehammar, Cathrine; University Health Care Research Centre, Faculty of Medicine and Health, Örebro University<br/> Hill, Wendy; University of New Brunswick, Institute of Biomedical Engineering<br/> Geers, Sybille; Fysische Geneeskunde en Revalidatie, University Hospital Gent<br/> Ortiz-Catalan, Max; Chalmers tekniska hogskola, Electrical Engineering; Integrum AB</p> |
| <b>Primary Subject Heading</b>: | Rehabilitation medicine                                                                                                                                                                                                                                                                                                                                                                                                                                                                                                                                                                                                                                                                                                                                                                                                                                                                                                                                                                                                                                                                                                                                                                                                                                                                                                                                                                                                                                                                                                                                                                                   |
| Secondary Subject Heading:      | Research methods, Occupational and environmental medicine, Sports and exercise medicine                                                                                                                                                                                                                                                                                                                                                                                                                                                                                                                                                                                                                                                                                                                                                                                                                                                                                                                                                                                                                                                                                                                                                                                                                                                                                                                                                                                                                                                                                                                   |
| Keywords:                       | Neurological pain < NEUROLOGY, Clinical trials < THERAPEUTICS, REHABILITATION MEDICINE                                                                                                                                                                                                                                                                                                                                                                                                                                                                                                                                                                                                                                                                                                                                                                                                                                                                                                                                                                                                                                                                                                                                                                                                                                                                                                                                                                                                                                                                                                                    |
|                                 |                                                                                                                                                                                                                                                                                                                                                                                                                                                                                                                                                                                                                                                                                                                                                                                                                                                                                                                                                                                                                                                                                                                                                                                                                                                                                                                                                                                                                                                                                                                                                                                                           |

1  
2  
3  
4  
5  
6  
7  
8  
9  
10  
11  
12  
13  
14  
15  
16  
17  
18  
19  
20  
21  
22  
23  
24  
25  
26  
27  
28  
29  
30  
31  
32  
33  
34  
35  
36  
37  
38  
39  
40  
41  
42  
43  
44  
45  
46  
47  
48  
49  
50  
51  
52  
53  
54  
55  
56  
57  
58  
59  
60

SCHOLARONE™  
Manuscripts

For peer review only

# Phantom Motor Execution as a treatment for Phantom Limb Pain: Protocol of an international, double-blind, randomised, controlled clinical trial.

Eva Lendaro<sup>1</sup>, Liselotte Hermanson<sup>2,3</sup>, Helena Burger<sup>4,5</sup>, Corry van der Sluis<sup>6</sup>, Brian E. McGuire<sup>7</sup>, Monika Pilch<sup>7</sup>, Lina Bunketorp-Käll<sup>8</sup>, Katarzyna Kulbacka-Ortiz<sup>8</sup>, Ingrid Rignér<sup>9</sup>, Anita Stocksélius<sup>10</sup>, Lena Gudmundson<sup>10</sup>, Cathrine Widehammar<sup>3</sup>, Wendy Hill<sup>11</sup>, Sybille Geers<sup>12</sup>, and Max Ortiz-Catalan<sup>1,13</sup>

<sup>1</sup> Biomechatronics and Neurorehabilitation Laboratory, Department of Electrical Engineering, Chalmers University of Technology, Gothenburg, Sweden

<sup>2</sup> Department of Prosthetics and Orthotics, Faculty of Medicine and Health, Örebro University Hospital, Örebro, Sweden

<sup>3</sup> Faculty of Medicine and Health, University Health Care Research Centre, Örebro University, Örebro, Sweden

<sup>4</sup> University Rehabilitation Institute, Ljubljana, Slovenia

<sup>5</sup> Faculty of Medicine, University of Ljubljana, Ljubljana, Slovenia

<sup>6</sup> University of Groningen, University Medical Centre Groningen, Department of Rehabilitation Medicine, Groningen, Netherlands

<sup>7</sup> School of Psychology & Centre for Pain Research, National University of Ireland, Galway, Ireland.

<sup>8</sup> Centre for Advanced Reconstruction of Extremities, Sahlgrenska University Hospital, Gothenburg, Sweden.

<sup>9</sup> Gåskolan/Ortopedteknik, Sahlgrenska University Hospital, Gothenburg, Sweden.

<sup>10</sup> Rehabcenter Sfären, Bräcke Diakoni, Stockholm, Sweden.

<sup>11</sup> Institute of Biomedical Engineering, University of New Brunswick, New Brunswick, Canada.

<sup>12</sup> Fysische Geneeskunde en Revalidatie, University Hospital Gent, Gent, Belgium.

<sup>13</sup> Integrum AB, Mölndal, Sweden.

Correspondence to: Dr. Max Ortiz-Catalan maxo@chalmers.se

## Abstract

**Introduction:** Phantom limb pain (PLP) is a chronic condition that can greatly diminish quality of life. Control over the phantom limb and exercise of such control have been hypothesized to reverse maladaptive brain changes correlated to PLP. Preliminary investigations have shown that decoding motor volition using myoelectric pattern recognition, while providing real-time feedback via virtual and augmented reality (VR-AR), facilitates phantom motor execution (PME) and reduces PLP.

Here we present the study protocol for an international (seven countries), multicentre (nine clinics), double-blind, randomized, controlled clinical trial to assess the effectiveness of PME in alleviating PLP.

**Methods and analysis:** Sixty-seven subjects suffering from PLP in upper or lower limbs are randomly assigned to PME or Phantom Motor Imagery (PMI) interventions. Subjects allocated to either treatment receive 15 interventions and are exposed to the same VR-AR environments using the same device. The only difference between interventions is whether phantom movements are actually performed (PME) or just imagined (PMI). Complete evaluations are conducted at baseline and at intervention completion, as well as 1, 3 and 6 months later using an intention to treat approach. Changes in PLP measured using the Pain Rating Index between the first and last session are the primary measure of efficacy. Secondary outcomes include: frequency, duration, quality of pain, intrusion of pain in activities of daily living and sleep, disability associated to pain, pain self-efficacy, frequency of depressed mood, presence of

catastrophizing thinking, health-related quality of life and clinically significant change as patient's own impression. Follow-up interviews are conducted up to six months after the treatment.

**Ethics and dissemination:** The study is performed in agreement with the Declaration of Helsinki, and under approval by the governing ethical committees of each participating clinic. The results will be published according to the CONSORT guidelines in a peer-reviewed journal.

## Strengths and limitations of this study

### Strengths

- This study involves a number of participants (>60) such to provide appropriate power to draw meaningful conclusions.
- This study is double-blinded, randomized, conducted in geographically different locations and involves subjects with both upper and lower limb amputations, thus enhancing generalizability.
- The choice of the comparator allows controlling in a stringent manner for the effect of the key factor hypothesized as the cause of pain reduction, namely, the execution of phantom limb movements.

### Limitations

- Treatment is limited to 15 sessions, which might not be enough to alleviate pain in all participants.
- The nature of the experimental treatment (PME) does not allow inclusion of individuals from which myoelectric signals cannot be recorded from the muscles in their residual limbs.

### Trial Registration

| DATA CATEGORY                                 | INFORMATION                                                                                                                       |
|-----------------------------------------------|-----------------------------------------------------------------------------------------------------------------------------------|
| Primary registry and trial identifying number | ClinicalTrials.gov NCT03112928                                                                                                    |
| Date of registration in primary registry      | April 10, 2017                                                                                                                    |
| Source(s) of monetary or material support     | Promobilia foundation (F16501), VINNOVA (Medtech4Health 2016-02290), EFIC Grünenthal Grant (358041552) and Integrum AB (sponsor). |
| Coordinator                                   | Chalmers University of Technology, Sweden                                                                                         |
| Investigational sites                         | Sahlgrenska University Hospital, Sweden<br>Örebro University, Sweden<br>Bräcke Diakoni, Sweden                                    |

| DATA CATEGORY                             | INFORMATION                                                                                                                                                                                                                                                                  |
|-------------------------------------------|------------------------------------------------------------------------------------------------------------------------------------------------------------------------------------------------------------------------------------------------------------------------------|
|                                           | University Rehabilitation Institute, Slovenia<br>Ghent University Hospital, Belgium<br>University Medical Center Groningen, The Netherlands<br>The University of New Brunswick, Canada<br>National University of Ireland, Galway, Ireland<br>Ruhr-University Bochum, Germany |
| Sponsor                                   | Integrum AB                                                                                                                                                                                                                                                                  |
| Contact for public queries                | Eva Lendaro, MSc, +46704231352<br>lendaro@chalmers.se                                                                                                                                                                                                                        |
| Contact for scientific queries            | Max Ortiz Catalan, PhD, +46708461065<br><a href="mailto:maxo@chalmers.se">maxo@chalmers.se</a>                                                                                                                                                                               |
| Public title                              | <i>Phantom Motor Execution as a Treatment of Phantom Limb Pain</i>                                                                                                                                                                                                           |
| Scientific title                          | <i>Phantom Motor Execution Via Myoelectric Pattern Recognition, Virtual and Augmented Reality, and Serious Gaming as a Treatment of Phantom Limb Pain</i>                                                                                                                    |
| Countries of recruitment                  | Sweden, Slovenia, Netherlands, Belgium, Ireland, Canada, Germany                                                                                                                                                                                                             |
| Health condition(s) or problem(s) studied | Phantom Limb Pain                                                                                                                                                                                                                                                            |
| Intervention(s)                           | Experimental: Phantom Motor Execution<br><br>Control: Phantom Motor Imagery                                                                                                                                                                                                  |
| Key eligibility criteria                  | <ul style="list-style-type: none"> <li>• The participants must be older than 18 years with chronic PLP</li> <li>• People with acute PLP are non-eligible. At least six months should have passed since</li> </ul>                                                            |



| DATA CATEGORY | INFORMATION                                                                                                                                                                                                                                                                                                                                                                                                                                                                                                                                                                                                                                                                                                                                                                                                                                                                                                                                                                                                                                                                                                                                                                                                                                                                                                                                                                                                                                                                     |
|---------------|---------------------------------------------------------------------------------------------------------------------------------------------------------------------------------------------------------------------------------------------------------------------------------------------------------------------------------------------------------------------------------------------------------------------------------------------------------------------------------------------------------------------------------------------------------------------------------------------------------------------------------------------------------------------------------------------------------------------------------------------------------------------------------------------------------------------------------------------------------------------------------------------------------------------------------------------------------------------------------------------------------------------------------------------------------------------------------------------------------------------------------------------------------------------------------------------------------------------------------------------------------------------------------------------------------------------------------------------------------------------------------------------------------------------------------------------------------------------------------|
|               | <p>amputation</p> <ul style="list-style-type: none"> <li>• In case of pharmacological treatments, the dosage must have been stable for the last month</li> <li>• Any previous PLP treatment must have terminated at least 3 months prior to commencing the study</li> <li>• Any pain reduction potentially attributable to previous PLP treatments must have occurred at least 3 months prior to commencing the study</li> <li>• Voluntary control over at least a portion of biceps and triceps muscles in case of upper limb amputation, or quadriceps and hamstrings in case of lower limb amputation.</li> <li>• Stable prosthetic situation (i.e. satisfaction with the fitting of the prosthesis) or being a non-user.</li> <li>• The participant should not have cognitive impairment that prevents them from following instructions.</li> <li>• No abundant soft tissue on the stump that prevents sufficient myoelectric signals from being recorded.</li> <li>• No presence of pain &gt; 2 on a numeric rating scale (NRS) upon contact with the skin or muscle contraction in the stump</li> <li>• The PLP must not be aggravated (NRS &gt; 4) by the execution or imagination of phantom movements</li> <li>• No condition associated with risk of poor protocol compliance</li> <li>• No injury, disease or addiction that would render the individual unsuitable for the trial</li> <li>• Pain Rating Index &gt; 0 as assessed in the Q-PLP at Visit 0</li> </ul> |
| Study type    | <p>Interventional<br/> Allocation: randomized<br/> Intervention model: parallel assignment<br/> Masking: double-blind (participant, evaluator)<br/> Primary purpose: treatment</p>                                                                                                                                                                                                                                                                                                                                                                                                                                                                                                                                                                                                                                                                                                                                                                                                                                                                                                                                                                                                                                                                                                                                                                                                                                                                                              |

| DATA CATEGORY           | INFORMATION                                                       |
|-------------------------|-------------------------------------------------------------------|
| Date of first enrolment | May 8 <sup>th</sup> , 2017                                        |
| Target sample size      | 67                                                                |
| Recruitment status      | Recruiting                                                        |
| Primary outcome         | Change in Phantom Limb Pain as measured by the Pain Rating Index. |

#### Protocol version

Clinical investigation plan code 007 733, version 02, 2017-05-24.

#### Sponsor contact information

Trial Sponsor: Integrum AB

Contact name: Anna Borglin

Address: Krokslätts Fabriker 50, SE-431 37, Mölndal, Sweden

Telephone: +46 (0)31-760 10 60

Email: info@Integrum.se

#### Funding

This study was funded by the Promobilia foundation (F16501), VINNOVA (Medtech4Health 2016-02290), EFIC Grünenthal Grant (358041552), and Integrum AB (sponsor).

#### Role of study sponsor and funders

The sponsor (Integrum AB) provided the devices and materials used in this study. Neither the sponsor nor the funders (Promobilia, VINNOVA, EGG) had a role in the design of the present protocol.

#### Roles and responsibilities

MO-C is the coordinating investigator of the study and endpoint adjudication evaluator. EL is the monitor of the trial, independent from the sponsor, and responsible for data management. Each site is constituted by at least a principal investigator, a therapist, and a blinded-evaluator. Investigational sites are independent from each other and from the sponsor.

#### Authors' contributions

MO-C conceived the PME treatment. MO-C and EL reviewed the literature and designed the study. All authors provided feedback on the design of the trial. BMG and MP assisted in the selection of psychological measure. LB-K and KK-O coordinated the ethical applications. EL and MO-C drafted the manuscript. EL, LH, HB, CS, BMG, MP, LB-K, KK-O, IR, AS, LG, CW, WH, SG and MO-C revised the study

1  
2  
3 protocol and approved the final manuscript. The authors thank the patients that with their feedback  
4 helped to define the research questions, outcome measures and the patient advisers.  
5

### 6 **Competing interests**

7 The sponsor of this study (Integrum AB) is a for-profit organization that might commercialize the device  
8 used in this study (PME and PMI). MO-C was partially funded by Integrum AB. The core technology used  
9 in this study has been made freely available as open source by MO-C (machine learning, virtual reality  
10 and electronics). All the other authors declare no competing interests.  
11  
12

## 13 **Introduction**

14 Phantom limb pain (PLP) is a chronic condition commonly suffered by amputees.(1,2) Although more  
15 than 60 different treatments to alleviate PLP have been described in the literature,(3) controlled clinical  
16 trials on such treatments are scarce and tend to be of poor quality.(4) The clinical investigation  
17 presented in this protocol aims to evaluate the efficacy of Phantom Motor Execution (PME) in reducing  
18 Phantom Limb Pain (PLP) in an international, multi-centre, double blind, randomized, controlled clinical  
19 trial. PME is accomplished by using a system (Neuromotus, Integrum AB, Sweden) that employs  
20 myoelectric pattern recognition to predict motor volition (movements of the phantom limb), while  
21 providing real-time feedback to the patient in virtual and augmented reality (VR/AR) environments. This  
22 technology allows the application of serious gaming in the therapy. PME is a non-invasive, non-  
23 pharmacological, and engaging treatment with no identified side effects at present.(5,6)  
24  
25  
26  
27

28 The effectiveness of PME was initially explored in a single upper limb amputee, with satisfactory results  
29 reported.(5) Prior to the pilot study, the patient had shown resistance to a variety of treatments for 48  
30 years (including mirror therapy). After PME, the sustained level of pain reported by the patient was  
31 gradually reduced to pain-free periods. He and his family also reported less intrusion of PLP in sleep and  
32 activities of daily living (ADL). Finally, the patient also acquired the ability to freely move his phantom  
33 arm and hand, consistent with a recent study by Raffin and colleagues where they found that reduced  
34 capability of phantom movement was correlated with more severe PLP.(7)  
35  
36

37 In the light of the findings in the case study, a non-randomized clinical investigation on PME was  
38 conducted in subjects with chronic intractable upper limb PLP.(6) Fourteen patients, for whom  
39 conventional PLP treatments failed and who suffered from PLP for an average of 10 years, received 12  
40 treatment sessions of PME, each of 1.5 hours' duration. At the end of the treatment period, patients  
41 showed statistically and clinically significant improvements (approx. 50% reduction of PLP). Intrusion of  
42 PLP during sleep and ADL was also reduced by a similar degree. These improvements were still present  
43 up to 6 months' post-treatment.(6) More recently, PME was also demonstrated to be a viable treatment  
44 for PLP in lower limb amputations.(8)  
45  
46

47 Strong evidence shows that PLP is related to neuroplastic changes in the primary somatosensory cortex,  
48 suggesting that central maladaptive plasticity is responsible for its maintenance. Neuroplasticity-based  
49 approaches for the relief of PLP, such as motor imagery and mirror therapy, ultimately aim to regain  
50 brain circuitry from pain processing. Nonetheless, these approaches have been shown to be limited in  
51 their effectiveness.  
52  
53

54 Although the practice of motor imagery has been shown to normalize previously altered cortical maps  
55 and reduce PLP,(9) evidence from randomized clinical studies has also suggested that it can increase  
56  
57  
58

1  
2  
3 pain.(10) These seemingly contradictory findings suggest that motor imagery should not be used alone  
4 but combined with other interventions, such as graded motor imagery (11) or mirror therapy.(12)  
5

6 Mirror therapy has demonstrated higher effectiveness than motor imagery in reducing pain,(10)  
7 however, it still cannot ensure that the patient performs movements with the phantom limb. For  
8 instance, it is enough for the patient to move their healthy arm to produce movement in the reflected  
9 limb. Whether a patient is actually engaging in execution of phantom limb movements is unknown. PME  
10 overcomes some of the methodological limitations of previous treatments by ensuring that central and  
11 peripheral mechanisms in motor control are activated during therapy.  
12  
13

## 14 Study objective

15 This paper presents the study protocol for a RCT in which upper and lower limb amputees are treated.  
16 The investigation primarily aims at assessing the efficacy of PME aided by myoelectric pattern  
17 recognition, augmented and virtual reality, and serious gaming to reduce Phantom Limb Pain (PLP). In  
18 order to isolate the contribution of PME in alleviating PLP over potential placebo effects, Phantom  
19 Motor Imagery (PMI) is used in this study as an active control treatment.  
20  
21

22 The working hypothesis of PME is that execution of phantom limb movements would exploit  
23 competitive neuroplasticity and provide a more integral normalization of cortical, sub-cortical, and  
24 spinal circuits compared to interventions that do not enable integration of sensory and motor  
25 information. Therefore, in this superiority trial, we hypothesise that the participants receiving the  
26 experimental treatment (PME) to obtain a larger reduction in PLP levels than those randomized to the  
27 control treatment.  
28  
29

## 30 Trial design

31 This clinical study is an international, multicentre, double-blind, randomised controlled trial. The study  
32 takes place in seven counties and involves nine clinics, which are listed in Table 1. Participants are  
33 randomly assigned to receive either the experimental or the control treatment in a 2:1 allocation ratio.  
34 The choice of the allocation ration was made in order to collect more data on the intervention of  
35 interest. Each patient is followed up for a period of six months, at the end of which they are given the  
36 choice to undergo the alternative treatment. The total duration of the study is expected to be  
37  
38  
39  
40

41 *Table 1: List of the investigational sites, divided by countries taking part to the international, multicenter randomized*  
42 *clinical trial.*

| Country     | Investigational site                                                                                            |
|-------------|-----------------------------------------------------------------------------------------------------------------|
| Sweden      | Sahlgrenska University Hospital, Gothenburg                                                                     |
|             | Örebro University Hospital, Örebro                                                                              |
|             | Rehabcenter Sfären, Bräcke Diakoni, Stockholm                                                                   |
| Slovenia    | University Rehabilitation Institute, Ljubljana                                                                  |
| Belgium     | Fysische Geneeskunde en Revalidatie University Hospital Gent, Gent                                              |
| Netherlands | Department of Rehabilitation Medicine, University Medical Centre Groningen, Groningen                           |
| Canada      | Institute of Biomedical Engineering, University of New Brunswick, New Brunswick                                 |
| Ireland     | Centre for Pain Research, National University of Ireland, Galway                                                |
| Germany     | Department of Psychosomatic Medicine and Psychotherapy, LWL University Hospital, Ruhr-University Bochum, Bochum |

1  
2  
3 approximately three years.  
4

## 5 **Methods: Participants, interventions, and outcomes**

6  
7 A procedural overview of the trial is provided by the flow diagram of Figure 1. Recruitment of the  
8 participants is conducted via advertisements at local investigation clinics, on social media, and in local  
9 newspapers. People who are interested in taking part in the trial are invited to contact the principal  
10 investigator of the site, or a person appointed by the principal investigator, via phone or email.  
11

### 12 **Eligibility criteria**

13  
14 Interested people are invited to a pre-assessment visit (Visit 0). On this occasion, the therapist (clinical  
15 investigator) explains the study in detail and answers all the questions that might arise. Afterwards, the  
16 participants are asked to provide written informed consent (see Appendix A). If consent is granted,  
17 eligibility to the study is assessed according to the criteria presented below:  
18

- 19 • The participants must be older than 18 years with chronic PLP
- 20 • Participants must have chronic PLP - at least six months should have passed since amputation.  
21 Participants with acute PLP are non-eligible.
- 22 • In case of pharmacological treatments, the dosage must have been stable for the previous month
- 23 • Any previous PLP treatments must have terminated at least 3 months prior to entering the study
- 24 • Any pain reduction potentially attributable to previous PLP treatments must have occurred at  
25 least 3 months prior to entering the study
- 26 • Voluntary control over at least a portion of biceps and triceps muscles in case of upper limb  
27 amputation, or quadriceps and hamstrings in case of lower limb amputation.
- 28 • Stable prosthetic situation (i.e. satisfaction with the fitting of the prosthesis) or being a non-user.
- 29 • The subject should not have a cognitive impairment that prevents them from following  
30 instructions.
- 31 • No abundant soft tissue on the stump that prevents sufficient myoelectric signals from being  
32 recorded.
- 33 • No presence of pain > 2 on NRS upon contact with the skin or muscle contraction in the stump
- 34 • The PLP must not be aggravated (NRS > 4) by the execution or imagination of phantom  
35 movements
- 36 • No condition associated with risk of poor protocol compliance
- 37 • No injury, disease or addiction that would render the individual unsuitable for the trial
- 38 • Pain Rating Index (PRI) > 0 as assessed in the Questionnaire for Phantom Limb Pain (Q-PLP) at Visit 0  
39  
40  
41  
42  
43  
44

### 45 **Concomitant medications**

46 Any co-intervention aiming to reduce PLP is prohibited during the trial. However, in the design of the  
47 trial it is acknowledged that there is a large possibility for patients with PLP to be high consumers of  
48 analgesic medicines. Therefore, the use of concomitant medications is allowed provided that at the time  
49 of inclusion, the patient has stable consumption for at least one month before entering the study and  
50 any pain reduction potentially attributable to the drug occurred at least three months before entering  
51 the study. Intake of pain medication in patients who show considerable improvement can be gradually  
52 reduced at the discretion of the responsible physician, given that the patient is followed up regularly.  
53 Medication intake is thus monitored as an outcome variable called "need of concomitant medication",  
54 which is used to describe and compare the amount of co-medication in the treatment groups.  
55  
56  
57  
58

## Interventions

All of the therapists at the clinics are introduced to the technology with at least one practical demonstration by the first (EL) and/or last author (MO-C). The therapists conduct the interventions independently, and periodically the first author monitors the correct execution of the protocol. Participants in both intervention groups receive 15 treatment sessions of 2 hours' duration, including system setup and a blinded outcome assessment. The frequency of the sessions is chosen by the participant and can be once, twice (advised frequency), or five times per week, yielding a total patient duration that ranges between 28 and 40 weeks. Both treatment groups use the same device and set up, which are sketched in Figure 2. The only difference between the two groups is the type of interaction with the virtual environments (active: motor execution; or passive: motor imagery). Allocated interventions for a given trial participant cannot be modified. Dates of the treatment sessions are recorded.

## Experimental Treatment

In the PME intervention, motor volition is decoded by interpreting the signals from the stump muscles via myoelectric pattern recognition.<sup>(13,14)</sup> The decoded movement is visualized in the virtual environments (i.e. virtual limb or serious gaming). The end result is that the user, by training with the system, can achieve control over the virtual environments by performing phantom limb movements associated with kinetic sensations analogous to the ones pertaining to the limb prior to amputation.

A treatment session consists of the following steps:

1. Placement of the electrodes and fiducial marker;
2. Treatment cycles
  - Recording session
  - Practice of PME with VR/AR
  - Serious gaming using phantom movements
  - Practice of PME by matching random target postures of a virtual arm in VR (TAC Test,<sup>(15)</sup>).
3. Pain evaluation (Q-PLP, see Outcomes section)

Different treatment cycles (step 2) are repeated during a treatment session in order to execute various phantom limb movements or combinations of movements. The level of difficulty gradually increases during the treatment phase from 1 to 5 by adding degrees of freedom to be trained within the same treatment cycle. In this context, a degree of freedom is any pair of movements performing opposite actions such as opening and closing of the hand, or extension and flexion of the knee.

Clinicians are instructed to advance the level of difficulty once the previous level is accomplished successfully, and revert to the previous level if the patient shows considerable difficulty accomplishing the tasks. More details on the acquisition of myoelectric signals, prediction of motor volition, the various parts of the treatment session, and the different levels of difficulty are presented in Appendix B.

## Control Treatment

In the control treatment (PMI), patients are not allowed to produce/execute phantom movements, but must imagine performing such movements while observing them executed autonomously by the VR/AR environments. The device is identical to the one used in the experimental treatment, but here the

1  
2  
3 myoelectric signals are used to monitor that the patient does not produce muscular contractions, rather  
4 than decoding motor volition.  
5

6 The control treatment session is conducted using the same step-wise procedure as the experimental  
7 group with the addition of a calibration step at the beginning of the treatment cycle. Calibration is  
8 necessary to set the threshold for myoelectric signals above which the system alerts the user that a  
9 muscular contraction is performed. As in PME, the treatment cycle is repeated for different imaginary  
10 phantom limb movements or a set of imaginary movements following the same levels of difficulty. In  
11 the game format, the participants control the game using the keyboard with an able limb. Bilateral  
12 upper limb amputees use a joystick with any able limb. Details on the methods are presented in  
13 Appendix B.  
14  
15

### 16 **Withdrawal or termination of individual participants**

17  
18 Participants are free to withdraw from participation in the study at any time upon request. An  
19 investigator may terminate participation in the study if:  
20

- 21 • Any clinical adverse event, clinical abnormality, or other medical condition or situation occurs  
22 such that continued participation in the study would not be in the best interest of the  
23 participant.
- 24 • The participant no longer meets the eligibility criteria because of a condition newly developed or  
25 not previously recognized.  
26

27  
28 The main analysis will be conducted using the intention to treat (ITT) methodology. Missing data due to  
29 withdrawal or termination will be imputed using the 'last observation carried forward' method. From  
30 previous studies, the dropout rate is estimated at approximately 10% and this was taken into account  
31 for the calculation of the sample size.  
32

### 33 **Outcomes**

34 Outcomes will be evaluated at every treatment session and three follow-up assessments at one, three,  
35 and six months' post-treatment. The outcomes are measured by the evaluators following the participant  
36 treatment schedule presented in Table 2.  
37  
38

### 39 **Primary outcome measure**

40 The primary outcome of the study is the change in PLP intensity measured by the difference in Pain  
41 Rating Index (PRI) between baseline (Visit 0) and at the post-treatment assessment (Visit 15). The PRI is  
42 computed as the sum of the scores for all descriptors of the Short Form of the McGill Pain Questionnaire  
43 (SF-MPQ).(16) Within this study, the SF-MPQ is included in one more extensive survey named  
44 Questionnaire for Phantom Limb Pain (Q-PLP), which is described below in the secondary outcome  
45 measures.  
46  
47

### 48 **Secondary outcome measures**

49 Secondary outcomes consider different aspects related to PLP such as pain frequency, pain duration,  
50 quality of pain, intrusion of pain in activities of daily living and sleep, disability associated with pain, pain  
51 self-efficacy, mood, presence of catastrophizing thinking, health-related quality of life and the patient's  
52 own impression about the effect of treatment. The secondary outcome measures are:  
53  
54  
55  
56  
57  
58

### *Pain Disability Index (PDI)*

Pain Disability Index, a 7-item questionnaire designed to investigate the extent to which chronic pain interferes with a person's ability to engage in various life activities.(17) An over-all pain disability index score is obtained by summing the numerical ratings of the questionnaire's single items.

### *Questionnaire for Phantom Limb Pain (Q-PLP)*

The Q-PLP is a 16-item questionnaire based on a combination of the SF-MPQ (Melzack 1987) and study-specific questions use in previous studies ((6,8,5)). The part containing the SF-MPQ is used for the calculation of the Pain Rating Index (primary outcome measure).

The Q-PLP assesses intensity, quality, duration, and frequency of phantom limb pain using the following metrics: the numeric rating scale (scale range 0 - 10) to assess the intensity of pain at present; the weighted pain distribution (scale range 0 - 5) to capture the time-varying nature of chronic pain by adding the contributions of weighted portions of time spent in six pain levels (present pain intensity scale,(18)); and a study-specific descriptive scale of seven steps: "never", "once per month", "once per week", "few times per week", "once per day", "few times per day", and "always" to measure the frequency of pain.

In addition, the Q-PLP is used to monitor the intensity of stump pain, phantom limb sensations, phantom motor ability, intrusion of phantom limb pain in activities of daily living and sleep, by one question each using a numeric rating scale. Changes in prosthetic hardware, medication, presence of telescoping (feeling that the phantom limb is gradually shortening over time), and location of pain are also monitored by the Q-PLP.

### *Euroqol-5D-5L (EQ-5D-5L)*

The EQ-5D-5L is a standardised questionnaire used to investigate health-related quality of life which is constituted by two components: health status and health evaluation.(19) Health status is measured in terms of five dimensions (mobility, self-care, usual activities, pain/discomfort, and anxiety/depression) on a five-point scale (no problems, slight problems, moderate problems, severe problems and extreme problems). In the health evaluation part, the EQ Visual Analogue Scale (EQ VAS) records the respondent's health on a vertical VAS where the end points are labelled 'best imaginable health state' and 'worst imaginable health state'.

### *Pain Self-Efficacy Questionnaire (PSEQ-2)*

The PSEQ-2 is a 2-item questionnaire that measures pain self-efficacy, which is the belief held by people with chronic pain that they can carry out certain activities and enjoy life, despite experiencing pain.(20,21) The items of the questionnaire are rated on a numeric rating scale from 0 to 6.

### *Pain Catastrophizing Scale – 6 (PCS-6)*

The PCS-6 is a 6-item questionnaire that investigates catastrophizing thinking in a range from 0 to 4.(22,23) Pain catastrophizing denotes a negative cognitive-affective response to pain and is associated to increased pain severity, disability and depressive symptoms and is associated with poor adjustment to chronic pain.(24)



### *Patient Health Questionnaire-2 (PHQ-2)*

The PHQ-2 is a screening instrument consisting of two items assessing the presence of a depressed mood and a loss of interest or pleasure in routine activities.(25,26) The items of the questionnaire are rated on a numerical scale from 0 to 3.

### *Patients' Global Impression of Change (PGIC)*

The PGIC is a single question used to identify clinically significant change by rating the patient's belief about the efficacy of treatment on a 7-point scale, ranging from 'no change (or condition has got worse)' to 'a great deal better'.(27)

## Additional measurements

Participants are asked to supply details regarding background information such as age, gender, height, weight, type and use of the prosthesis, level of embodiment of the prosthesis, onset of PLP, details about previous and ongoing intervention for PLP and side, level and date of amputation. Additionally, we also survey: patients' expectancy of benefit using the Expectations for Complementary and Alternative Medicine Treatments (EXPECT-SF);(28) patients' judgment about the credibility of the treatment using the Opinion About Treatment (OAT)(29) and patients' perception of therapists' supportive behaviour using the short form of the 6-item Health Care Climate Questionnaire (HCCQ).(30)

## Sample size

The calculation of the sample size was based on our primary hypothesis and informed by our previous clinical trial with no control group.(6) In order to find a mean difference of 4 between the two randomised groups in the primary outcome measure (PRI), with power of 80% resulting from a two-sided Fisher's non-parametric permutation test at 5% significance level, is estimated that at least 60 participants are required. As a drop-out rate of 10% is expected, a total of 67 patients will be randomised.

## Methods: Assignment of intervention

### Randomization

Participants are assigned to the experimental or control group according to the optimal allocation scheme of minimization, aimed at reducing the imbalance between the number of patients allocated to each treatment group. The randomization proportion is 2:1, with twice as many subjects assigned to the experimental treatment. The allocation ratio was chosen to collect more information on important variables regarding the intervention of interest. The allocation aims to minimize the imbalance of the following factors:

- Level of amputation (upper and lower)
- Baseline PLP based on the NRS (low 1 to 4, and high 5 to 10)
- Investigation site (9 centres)

The minimisation process is conducted using the open source desktop application MinimPy,(31) operated by the monitor of the clinical trial. Every time a research team at a particular investigational site recruits a new participant, they assess the person's eligibility for the study (Visit 0). Afterwards, if the participant is deemed eligible, the research team sends the minimization factors relative to the enrolled participant to the monitor, who runs the randomisation, and informs the research team of the allocation.

## Blinding

This investigation has been designed in such a way that participants of the two treatment groups use the same device under the same circumstances.

Even though the patients are necessarily aware of the treatment they are receiving, they do not have an expectation of superiority of the experimental over the control treatment (or vice versa), since the trial is framed as a comparison between two different interventions previously described in the literature. It is worth noting that the distinction between motor execution and motor imagery is often imperceptible, even for professionals in the field, who have often described voluntary movements of the missing limb as imaginary movements.<sup>(9,32–37)</sup> We take this fact as a corroborant of our assumption that there are no differences at baseline with respect to expectations and opinions about the assigned treatment among participants. Nevertheless, individuals' expectations regarding outcomes and credibility of the assigned treatment are assessed with the EXPECT-SF and the OAT questionnaires respectively.

The nature of the investigation does not allow the masking of the treatment for the therapists. However, it is still important to check for possible differences between the two groups concerning the therapists' supportive behaviour. For this reason, the HCCQ, is included as a measure of the extent to which a health care provider (or the staff) interacts with their patient in a supportive manner.

The outcome assessments are conducted by independent persons who are blinded to the group allocation, making the trial double blind. In order to keep group allocation confidential, participants are requested prior to each assessment not to reveal allocation or therapy content to the evaluators.

The raw data resulting from the outcome assessment has the same structure for both interventions, making it impossible to tell the group assignment without being in possession of the documents containing links between participant's identity and their code number.

Table 2: Summary of the different items (intervention, forms and questionnaires) to be completed at each evaluation appointment. Questionnaire for Phantom Limb Pain (Q-PLP), Pain Disability Index (PDI), 2-item Pain Self-Efficacy Questionnaire (PSEQ-2), Euroqol-5D-5L (EQ-5D-5L), Pain Catastrophizing Scale Short Form (PCS-SF), 2-item Patient Health Questionnaire (PHQ-2), Patients' Global Impression of Change (PGIC), Opinion About Treatment (OAT), Health Care Climate Questionnaire (HCCQ) and Expectations for Complementary and Alternative Medicine Treatments Short Form (EXPECT-SF). In brackets the indication of whether the therapist (T) or the evaluator (E) is responsible of conducting a particular item is

| Session              | Summary of content                                                                                                                                                                                                                                                                                                                    |
|----------------------|---------------------------------------------------------------------------------------------------------------------------------------------------------------------------------------------------------------------------------------------------------------------------------------------------------------------------------------|
| Visit 0              | <ul style="list-style-type: none"> <li>• Patient Information (T)</li> <li>• Study Consent (T)</li> <li>• Pre-Assessment (T)</li> <li>• Background Information (T)</li> <li>• Q-PLP (T)</li> <li>• PDI (T)</li> <li>• EQ5D-5L (T)</li> <li>• PSEQ-2 (T)</li> <li>• PCS-SF (T)</li> <li>• PHQ-2 (T)</li> <li>• EXPECT-SF (T)</li> </ul> |
| <b>Randomization</b> |                                                                                                                                                                                                                                                                                                                                       |
| Visit 1              | <ul style="list-style-type: none"> <li>• Treatment session (T)</li> <li>• Q-PLP (E)</li> <li>• OAT (E)</li> <li>• EXPECT-SF (E)</li> <li>• HCCQ-SF (E)</li> </ul>                                                                                                                                                                     |
| Visit 2-14           | <ul style="list-style-type: none"> <li>• Treatment session (T)</li> <li>• Q-PLP (E)</li> </ul>                                                                                                                                                                                                                                        |
| Visit 15             | <ul style="list-style-type: none"> <li>• Treatment session (T)</li> <li>• Q-PLP (E)</li> <li>• PDI (E)</li> <li>• EQ5D-5L (E)</li> <li>• PSEQ-2 (E)</li> <li>• PCS-SF (E)</li> <li>• PHQ-2 (E)</li> <li>• PGIC (E)</li> <li>• HCCQ-SF (E)</li> </ul>                                                                                  |
| 1-month follow-up    | <ul style="list-style-type: none"> <li>• Q-PLP (E)</li> <li>• PDI (E)</li> </ul>                                                                                                                                                                                                                                                      |
| 3-month follow-up    | <ul style="list-style-type: none"> <li>• EQ5D-5L (E)</li> <li>• PSEQ-2 (E)</li> </ul>                                                                                                                                                                                                                                                 |
| 6-month follow-up    | <ul style="list-style-type: none"> <li>• PCS-SF (E)</li> <li>• PHQ-2 (E)</li> </ul>                                                                                                                                                                                                                                                   |

## Methods: Data collection, management and analysis

### Data collection and management

The monitor of the study (EL) is in charge of overseeing the progress of the RCT and ensuring that it is conducted, recorded, and reported in accordance with the protocol, Good Clinical Practice (GCP), and regulatory requirements.

The monitor supplies Case Report Forms (CRFs), which are filled in by the evaluator at each site. The evaluator is responsible to document all data obtained during the study which is identified by participant code number. This also applies to data for patients who, after having consented to participate, undergo the baseline examinations required for inclusion in the study, but who are not included. No items in the CRF are to be left unattended: if data are missing or are impossible to obtain, these should be documented as “not available” (NA) and the reasons for missing data must be noted in the document.

All data are recorded and stored in digital form on encrypted electronic devices. Documents containing links between a participant’s identity and their code number exist only in paper form and are kept in locked file cabinets with limited access at the investigation site where the participants have been treated. In accordance with the regulations issued by The Swedish Data Protection Authority, a personal register will be established.

The clinical investigators are responsible to probe, via discussion with the participant, for the occurrence of adverse events during each visit and record the information in the patient CRF. Adverse events must be described by duration (start and stop dates and times), severity, outcome, treatment and relation to study device, or if unrelated, the cause. The investigator must report any reportable event to the monitor in acceptable timely conditions, but not later than three working days after the occurrence of the event. The sponsor must report to the Medical Products Agency (Läkemedelsverket) any serious adverse event which indicates an imminent risk of death, serious injury, or serious illness and that requires prompt remedial action for other patients, users or other persons immediately, but not later than two working days after becoming aware of a new reportable event or of new information in relation to an already reported event.

Once all the data are collected, checked, and corrected, the database is closed and analyses performed. All data transfer, processing and analyses are done using depersonalised data and all the data sets are protected by password. In order to promote data quality, the evaluators are trained on all the data collection and management procedures and are provided with written instructions by the first (EL) and last (MO-C) authors.

To incentivise the completion of the follow-up, the patients are given the choice to participate in these assessments at the clinic or via a phone interview with the evaluators. When possible, follow-up assessments are also conducted with participants that had discontinued the treatment or withdrew from the study.

### Statistical methods

The main analysis will be performed in terms of change from baseline to the measurement at treatment completion using the ITT population. Complementary analyses will be performed on the Per Protocol (PP) population with respect to the change from baseline to the follow up assessments at 1,3 and 6

1  
2  
3 months after completion. These complementary analyses will include also the data coming from  
4 patients that after appropriate washout period to exclude carry-over, have crossed over to the  
5 alternative treatment. Both the ITT population and the PP population will be specified in detail at the  
6 Clean file meeting before the database lock and before breaking the code. The PP population will be  
7 restricted to the participants who successfully complete all 15 treatment sessions.  
8  
9

10 Suitable graphical and numerical summaries will be provided for all the variables measured and for  
11 corresponding changes in scores.  
12

13 For the main unadjusted comparison between two groups, Fisher's non-parametric permutation test will  
14 be used for continuous variables, Mantel-Haenszel chi-square test for ordered categorical variables,  
15 Fisher's exact test for dichotomous variables and Pearson's chi-square test for non-ordered categorical  
16 variables. Confidence intervals at 95% for the mean differences between two groups will be given when  
17 appropriate. If differences exist between the two randomised groups between baseline variables that  
18 could influence the outcome variables, a complementary adjusted analysis will be performed for these  
19 baseline variables.  
20  
21

22 For adjusted comparison between two groups, analysis of covariance (ANCOVA) will be used for  
23 continuous outcome variables not obviously non-normally distributed with intervention/control as  
24 independent variable and all confounders as covariates.  
25

26 For analysis of change within groups, Wilcoxon Signed rank test will be used for continuous variables  
27 and Sign test for ordered categorical and dichotomous variables. A complementary mixed model  
28 analysis between the two treatments regarding the primary efficacy variable with centre as random  
29 effect will be used to correct for the centre-effect in the statistical models.  
30  
31

32 All correlations will be performed with Spearman's correlation coefficient. The distribution of  
33 continuous variables will be given as mean, standard deviation, median, minimum and maximum, and  
34 distribution of categorical variables will be given as numbers and percentages. All statistical tests will be  
35 two-sided and conducted at the 5% significance level. The theory of sequential multiple test procedures  
36 will be applied for the primary analysis and for secondary analyses. If a test gives a significant result at  
37 the 5% significance level, the total test mass will be transferred to the following number in the test  
38 sequence until a non-significant result is achieved. All these significant tests will be considered  
39 confirmative. A Statistical Analysis Plan (SAP) will be written with all detailed statistical analyses  
40 specified.  
41  
42

### 43 Patient and Public Involvement

44 The design of the study was informed by the experience with our previous clinical investigation, (6)  
45 thanks to which patients' priorities, experience, and preferences were identified and used for the  
46 development of the research question and outcome measures of the current RCT. The burden of the  
47 control intervention was assessed with a pilot study on volunteers with past experience with the  
48 experimental intervention.  
49  
50  
51  
52  
53  
54  
55  
56  
57  
58

## Ethics and dissemination

### Research ethics approval

There are no known risks associated with the experimental or control treatments and clinically significant deterioration is rare. Possible individual benefits include reduced phantom limb pain, reduced disability associated with pain, and improvement in various aspects related to quality of life. This trial has been approved by the governing ethical committees of each participating country. Important protocol modifications will be reported in a timely manner to all the relevant parties.

### Access to data

The principal investigator, MO-C, has full access to all of the data in the study except the documents containing the link between patient's identity and their code number, which will be accessible only after the completion of the data analyses. MO-C takes responsibility for the integrity of the data and the accuracy of the data analysis.

### Dissemination Policy

Regardless of the significance, direction, or magnitude of effect, the consortium will publish the findings of this study in scientific, peer-reviewed journals and conferences following the CONSORT guidelines. All the clinical investigators will author the scientific article reporting the results of the trial. Results will be also disseminated to all the participants of the study with a report. No professional writers external to the study will be used aside from conventional English proof reading. Access to the detailed clinical investigation plan, participant-level dataset, and statistical code will be granted based on reasonable requests after the publication of the study.

### Trial status

This clinical trial is currently in the participant enrolment phase. Fourteen patients have been randomized and are under treatment at November 2017. It is anticipated that full analysis will be finalised in April 2020.

## References

1. Dijkstra PU, Geertzen JHB, Stewart R, van der Schans CP. Phantom pain and risk factors: a multivariate analysis. *J Pain Symptom Manag* [Internet]. 2002 Dec;24(6):578–85. Available from: <http://www.ncbi.nlm.nih.gov/pubmed/12551807>
2. Clark RL, Bowling FL, Jepson F, Rajbhandari S. Phantom limb pain after amputation in diabetic patients does not differ from that after amputation in nondiabetic patients. *Pain*. 2013 May;154(5):729–32.
3. Nikolajsen L, Jensen TS. Phantom limb pain. *Br J Anaesth*. 2001 Jul;87(1):107–16.
4. Batsford S, Ryan CG, Martin DJ. Non-pharmacological conservative therapy for phantom limb pain: A systematic review of randomized controlled trials. *Physiother Theory Pract* [Internet]. 2017;33(3):173–83. Available from: <http://dx.doi.org/10.1080/09593985.2017.1288283>
5. Ortiz-Catalan M, Sander N, Kristoffersen MB, Håkansson B, Brånemark R. Treatment of phantom limb pain (PLP) based on augmented reality and gaming controlled by myoelectric pattern recognition: A case study of a chronic PLP patient. *Front Neurosci*. 2014;

6. Ortiz-Catalan M, Guðmundsdóttir RA, Kristoffersen MB, Zepeda-Echavarria A, Caine-Winterberger K, Kulbacka-Ortiz K, et al. Phantom motor execution facilitated by machine learning and augmented reality as treatment for Phantom Limb Pain. *Lancet*. 2016;388(10062):2885–94.
7. Raffin E, Richard N, Giroux P, Reilly KT. Primary motor cortex changes after amputation correlate with phantom limb pain and the ability to move the phantom limb. *Neuroimage*. 2016;130:134–44.
8. Lendaro E, Mastinu E, Håkansson B, Ortiz-Catalan M. Real-time classification of non-weight bearing lower limb movements using EMG to facilitate phantom motor execution: engineering and case study application on phantom limb pain. *Front Neurol*. 2017;8(September):1–12.
9. MacIver K, Lloyd DM, Kelly S, Roberts N, Nurmikko T. Phantom limb pain, cortical reorganization and the therapeutic effect of mental imagery. *Brain* [Internet]. 2008 Aug [cited 2016 Jun 10];131(Pt 8):2181–91. Available from: <http://www.ncbi.nlm.nih.gov/pubmed/18567624>
10. Chan BL, Witt R, Charrow AP, Magee A, Howard R, Pasquina PF, et al. Mirror therapy for phantom limb pain. *N Engl J Med*. 2007;357(21):2206–7.
11. Moseley GL. Graded motor imagery for pathologic pain: A randomized controlled trial. *Neurology*. 2006;67(12):2129–34.
12. Bowering KJ, Connell NEO, Tabor A, Catley MJ, Leake HB, Moseley GL, et al. The Effects of Graded Motor Imagery and Its Components on Chronic Pain: A Systematic Review and Meta-Analysis. *J Pain* [Internet]. 2013;14(1):3–13. Available from: <http://dx.doi.org/10.1016/j.jpain.2012.09.007>
13. Ortiz-Catalan M, Brånemark R, Håkansson B. BioPatRec: A modular research platform for the control of artificial limbs based on pattern recognition algorithms. *Source Code Biol Med* [Internet]. 2013;8(1):11. Available from: <http://www.pubmedcentral.nih.gov/articlerender.fcgi?artid=3669028&tool=pmcentrez&rendertype=abstract>
14. Ortiz-Catalan M, Håkansson B, Brånemark R. Real-time and simultaneous control of artificial limbs based on pattern recognition algorithms. 2014;22(4):756–64.
15. Simon AM, Hargrove LJ, Lock BA, Kuiken TA. Target Achievement Control Test: evaluating real-time myoelectric pattern-recognition control of multifunctional upper-limb prostheses. *J Rehabil Res Dev* [Internet]. 2011;48(6):619–27. Available from: <http://www.pubmedcentral.nih.gov/articlerender.fcgi?artid=4232230&tool=pmcentrez&rendertype=abstract>
16. Melzack R. The short-form McGill pain questionnaire. *Pain*. 1987;30(2):191–7.
17. Pollard CA. Preliminary validity study of the pain disability index. *Percept Mot Skills* [Internet]. 1984 Dec [cited 2017 Jan 9];59(3):974. Available from: <http://www.ncbi.nlm.nih.gov/pubmed/6240632>
18. Melzack R. The McGill Pain Questionnaire: Major properties and scoring methods. *Pain*. 1975;1(3):277–99.
19. Herdman M, Gudex C, Lloyd A, Janssen M, Kind P, Parkin D, et al. Development and preliminary testing of the new five-level version of EQ-5D (EQ-5D-5L). *Qual Life Res*. 2011;20(10):1727–36.

- 1
- 2
- 3 20. Nicholas MK. The pain self-efficacy questionnaire: Taking pain into account. *Eur J Pain*. 2007;11(2):153–63.
- 4
- 5
- 6 21. Nicholas MK, McGuire BE, Asghari A, Adams JH, Williams Ac, Asghari A, et al. A 2-item
- 7 short form of the Pain Self-efficacy Questionnaire: development and psychometric
- 8 evaluation of PSEQ-2. *J Pain [Internet]*. 2015 Feb [cited 2017 Jan 8];16(2):153–63.
- 9 Available from: <http://www.ncbi.nlm.nih.gov/pubmed/25463701>
- 10
- 11 22. McWilliams LAA, Kowal J, Wilson KGG. Development and evaluation of short forms of the
- 12 Pain Catastrophizing Scale and the Pain Self-efficacy Questionnaire. *Eur J Pain (United*
- 13 *Kingdom) [Internet]*. 2015 Oct [cited 2017 Jan 9];19(9):1342–9. Available from:
- 14 <http://doi.wiley.com/10.1002/ejp.665>
- 15
- 16 23. Sullivan MJL, Bishop SR, Pivik J. The Pain Catastrophizing Scale: Development and
- 17 validation. *Psychol Assess [Internet]*. 1995 [cited 2017 Jan 9];7(4):524–32. Available from:
- 18 <http://doi.apa.org/getdoi.cfm?doi=10.1037/1040-3590.7.4.524>
- 19
- 20 24. Sullivan MJ, Thorn B, Haythornthwaite JA, Keefe F, Martin M, Bradley LA, et al.
- 21 Theoretical perspectives on the relation between catastrophizing and pain. *Clin J Pain*
- 22 *[Internet]*. 2001;17(1):52–64. Available from:
- 23 <http://eutils.ncbi.nlm.nih.gov/entrez/eutils/elink.fcgi?dbfrom=pubmed&id=11289089&retmode=ref&cmd=prlinks%5Cnpapers3://publication/uuid/1BA1859E-ODF6-4699-BEB8-3B7333A863F2%5Cnpapers3://publication/uuid/746F3ABA-CEFF-4BB5-B039-17620AE59164%5Cnhttp://eutil>
- 24
- 25
- 26
- 27
- 28 25. Spitzer RL, Kroenke K, Williams JBW. Validation and Utility of a Self-report Version of
- 29 PRIME-MD. *J Am Med Assoc [Internet]*. 1999;282(18):1737–44. Available from:
- 30 <http://jama.ama-assn.org/content/282/18/1737.abstract>
- 31
- 32 26. Kroenke K, Spitzer RL, Williams JBW. The Patient Health Questionnaire-2 Validity of a
- 33 two-item depression screener. *Med Care*. 2003;41(11):1284–92.
- 34
- 35 27. Hurst H, Bolton J. Assessing the clinical significance of change scores recorded on
- 36 subjective outcome measures. *J Manipulative Physiol Ther*. 2004;27(1):26–35.
- 37
- 38 28. Jones SM, Lange J, Turner J, Cherkin D, Ritenbaugh C, Hsu C, et al. Development and
- 39 Validation of the EXPECT Questionnaire : Assessing Patient Expectations of Outcomes of
- 40 Complementary and Alternative Medicine Treatments for Chronic Pain. 2016;0(0):1–11.
- 41
- 42 29. Mooney TK, Beth M, Gibbons C, Gallop R, Mack RA, Crits-christoph P. Credibility and the
- 43 Relation of Credibility to Therapy Outcome. 2015;24(5):565–77.
- 44
- 45 30. Williams GC, Freedman ZR, Deci EL. Supporting Autonomy to Motivate Patients With
- 46 Diabetes for Glucose Control. *Diabetes Care*. 1998;21(10):1644–51.
- 47
- 48 31. Saghaei M. Implementation of an open-source customizable minimization program for
- 49 allocation of patients to parallel groups in clinical trials. *J Biomed Sci Eng*.
- 50 2011;4(November):734–9.
- 51
- 52 32. Erslund L, Rosén G, Lundervold A, Smievoll a I, Tillung T, Sundberg H, et al. Phantom limb
- 53 imaginary fingertapping causes primary motor cortex activation: an fMRI study.
- 54 *Neuroreport*. 1996;8(1):207–10.
- 55
- 56 33. Hugdahl K, Rosén G, Erslund L, Lundervold A, Smievoll AI, Barndon R, et al. Common
- 57 pathways in mental imagery and pain perception: an fMRI study of a subject with an
- 58 amputated arm. *Scand J Psychol [Internet]*. 2001 Jul [cited 2017 Feb 24];42(3):269–75.
- 59 Available from: <http://www.ncbi.nlm.nih.gov/pubmed/11501740>
- 60



- 1  
2  
3  
4  
5  
6  
7  
8  
9  
10  
11  
12  
13  
14  
15  
16  
17  
18  
19  
20
34. Lotze M, Flor H, Grodd W, Larbig W, Birbaumer N. Phantom movements and pain. An fMRI study in upper limb amputees. *Brain* [Internet]. 2001 Nov [cited 2016 Jun 10];124(Pt 11):2268–77. Available from: <http://www.ncbi.nlm.nih.gov/pubmed/11673327>
  35. Rosén G, Hugdahl K, Erslund L, Lundervold A, Smievoll AI, Barndon R, et al. Different brain areas activated during imagery of painful and non-painful “finger movements” in a subject with an amputated arm. *Neurocase* [Internet]. 2001;7(3):255–60. Available from: <http://www.ncbi.nlm.nih.gov/pubmed/11459920>
  36. Roux FE, Ibarrola D, Lazorthes Y, Berry I. Virtual movements activate primary sensorimotor areas in amputees: report of three cases. *Neurosurgery* [Internet]. 2001 Sep [cited 2017 Feb 24];49(3):736-41-2. Available from: <http://www.ncbi.nlm.nih.gov/pubmed/11523688>
  37. Roux FE, Lotterie JA, Cassol E, Lazorthes Y, Sol JC, Berry I, et al. Cortical Areas Involved in Virtual Movement of Phantom Limbs: Comparison with Normal Subjects. *Neurosurgery*. 2003;53(6):1342–53.

## Figure legends

21  
22  
23  
24  
25  
26  
27  
28

Figure 1: Flow diagram for the randomized controlled clinical trial. At least sixty-seven patients are recruited and randomly allocated to either Phantom Motor Execution (PME) or Phantom Motor Imagery (PMI) interventions in allocation ratio 2:1. Following the completion of the treatment protocol and wash-out period of six months it is possible for the patient to cross over to the parallel interventional arm, according to their will.

29  
30  
31  
32  
33  
34  
35  
36  
37  
38  
39  
40  
41  
42  
43  
44  
45  
46  
47  
48  
49  
50  
51  
52  
53  
54  
55  
56  
57  
58  
59

Figure 2: Schematic illustration of the clinical investigation device with all its components. Myoelectric signals are acquired through surface electrodes (A) by a myoelectric amplifier (B), electrically isolated (C). The signals are then processed by the software installed on the computer (D). The camera (E) films the participant and the recorded image is displayed on the monitor (F) with a virtual limb superimposed where the marker (G) is detected. Figure courtesy of Jason Millenaar.

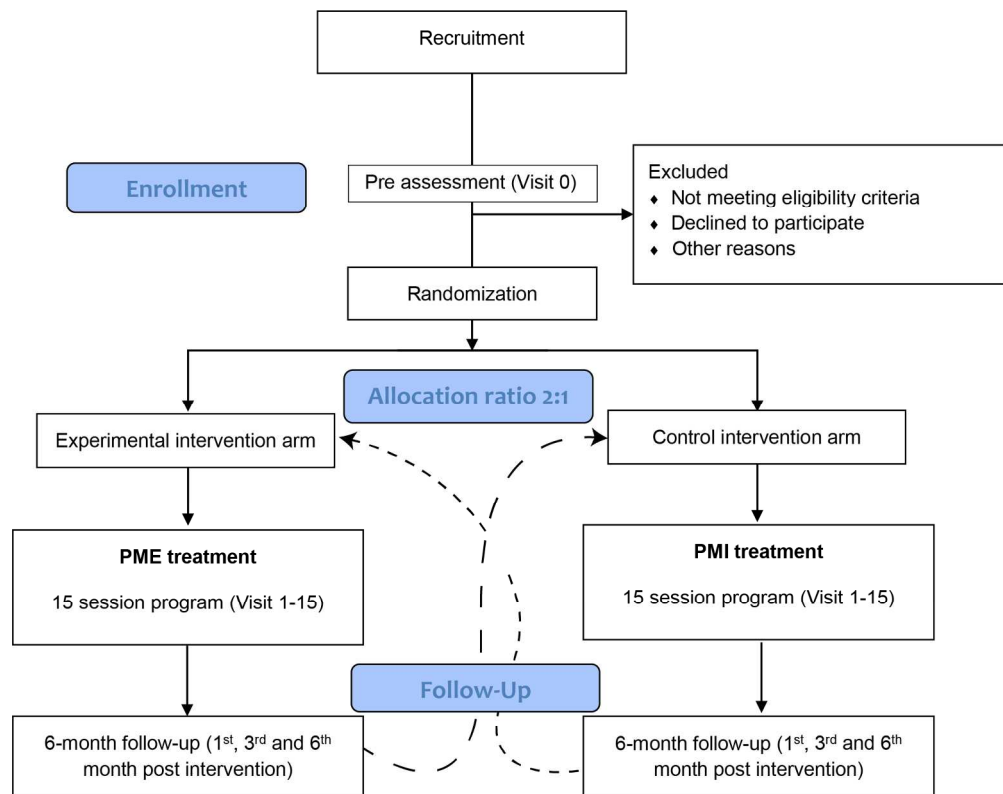

32  
33  
34  
35  
36  
37  
38  
39  
40  
41  
42  
43  
44  
45  
46  
47  
48  
49  
50  
51  
52  
53  
54  
55  
56  
57  
58  
59  
60

Flow diagram for the randomized controlled clinical trial. At least sixty-seven patients are recruited and randomly allocated to either Phantom Motor Execution (PME) or Phantom Motor Imagery (PMI) interventions in allocation ratio 2:1. Following the completion of the treatment protocol and wash-out period of six months it is possible for the patient to cross over to the parallel interventional arm, according to their will.

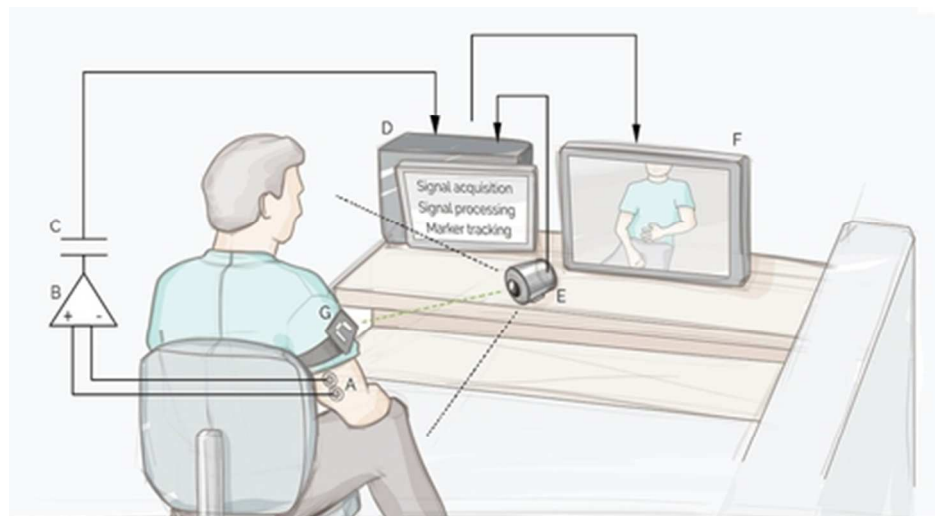

Figure 2: Schematic illustration of the clinical investigation device with all its components. Myoelectric signals are acquired through surface electrodes (A) by a myoelectric amplifier (B), electrically isolated (C). The signals are then processed by the software installed on the computer (D). The camera (E) films the participant and the recorded image is displayed on the monitor (F) with a virtual limb superimposed where the marker (G) is detected. Figure courtesy of Jason Millenaar.

39x22mm (300 x 300 DPI)

## PARTICIPANT INFORMATION SHEET

### 1. Introduction

**Title of Project:** Virtual Reality as a Treatment for Phantom Limb Pain – A Randomised Controlled Trial

### 2 Invitation

You are being invited to take part in a research study investigating the effect of two different forms of virtual motor training as a treatment for phantom pain. Before you decide, it is important for you to understand why the research is being done and what it will involve. This *Participant Information Sheet* will tell you about the purpose, risks and benefits of this research study. If you agree to take part, we will ask you to sign a Consent Form. If there is anything that you are not clear about, we will be happy to explain it to you. Please take as much time as you need to read it. You should only consent to participate in this research study when you feel that you understand what is being asked of you, and you have had enough time to think about your decision. Thank you for reading this.

### 3 Purpose of the Study

Phantom pain occurs in about 70-80% of all amputees and many continue to feel the lost body part which is called phantom arm or phantom leg. Some individuals feel that they can move their phantom arms or legs while others feel that the phantom limb is immobile and very painful. Although there are many different ways to treat phantom limb pain, there is still no satisfactory treatment to help all patients. During the last decade, TENS and mirror therapy have started to be used to treat phantom limb pain. A further development has taken place with the help of modern computer technology which enables the training of the amputated body part in a virtual reality. The method involves performing virtual motor training exercises i.e. patients learn to move an image of their phantom arm or leg and this is believed to stimulate repair mechanisms in the brain. We aim to investigate whether two different variants of this new technology effectively reduce phantom pain in amputees.

### 4 Study Design

The study is a randomized, controlled clinical trial. This means that the you have been randomly assigned to one of two groups that will receive different treatments for phantom limb. Both treatment methods are believed to be effective but we will examine if there is something in one of the two methods more effective than the other. If the current treatment does not give you any improvement, you'll be able to undergo the second form of treatment, if you wish, after completion of the first programme.

### 5 Taking part – what it involves

#### *What will happen to me if I take part?*

In the treatment, adhesive electrodes will be used: these will be attached to the skin on your stump. With these electrodes, signals from the stump muscles can be recorded. When the virtual arm or leg on the screen moves, you should either imagine or perform the same movements with your own phantom arm or leg. Activity in the stump muscles is recorded via the adhesive pads. The training also includes various computer games that are controlled by the system.

1  
2  
3 There are several possible explanatory mechanisms for the analgesic effect that can be achieved  
4 with virtual motor training. It is believed that the areas of the brain required for movements in the  
5 amputated arm are partially reactivated. The patient receives visual feedback that tricks the brain  
6 into thinking that there is an arm that receives the brain's movement commands. After each  
7 treatment, you will be asked to answer questions about how you experience phantom pain. At the  
8 first and last treatment session, you will also answer questions about how you experience your  
9 health overall. Individual interviews will be conducted on a sample of the study participants after  
10 treatment. The objective of the qualitative part is to explore how individuals experienced the  
11 treatment, and if and how this is perceived to have affected their health in general. To investigate  
12 whether the treatment has a lasting effect, you will be called for examination 1, 3 and 6 months  
13 after treatment.  
14

### 15 *Do I have to take part?*

16 It is up to you to decide whether or not to take part. If you do decide to take part you will be given  
17 this information sheet to keep and be asked to sign a consent form, a copy of which you can also  
18 keep. If you decide to take part, you are still free to withdraw at any time and without giving a  
19 reason. A decision to withdraw at any time, or a decision not to take part, will not affect your rights  
20 in any way.  
21

### 22 *How long will my part in the study last?*

23 There will be a total of 15 treatment sessions that last about 2 hours each. You can choose to receive  
24 the treatment one, two or five times a week.  
25

### 26 *What are the possible benefits in taking part?*

27 If the treatment has the effect we expect, your phantom pain is likely to decrease. In the unlikely  
28 event that the treatment does not produce results, you will get the opportunity to try the other  
29 treatment option after the completion of the long-term follow-up.  
30

### 31 *What are the possible disadvantages and risks of taking part?*

32 All elements of the study are done under safe conditions by trained and skilled staff and you will not  
33 be exposed to any risks associated with either treatment or evaluation. If you come into the  
34 treatment group that uses the stump muscles during exercise, you may experience tiredness in your  
35 muscles at the beginning of treatment. This, however, is transient.  
36

### 37 *What happens at the end of the study?*

38 When the long-term follow-up is completed, you will have the opportunity to have a copy of your  
39 own results. On request, you can also get information about the overall results of the study. The  
40 study and its results will be announced by publication in international scientific journals.  
41

### 42 *What happens if I change my mind during the study?*

43 You are entitled to change your mind about participating in this at any time without disadvantage or  
44 penalty. If you decide to withdraw, all your data will be destroyed and will not be used in the study.  
45

## 46 **6 Confidentiality**

47 All information that is collected about you during the course of the research will be kept strictly  
48 confidential and will not be shared with anyone else. The information collected in this research study  
49 will be stored in a way that protects your identity.  
50

51 Information obtained during this study will be compiled with the help of a computer to analyze the  
52 results. The information is treated as confidential and will be stored for 10 years. All data processing  
53  
54  
55  
56  
57  
58  
59

1  
2  
3 will be done with coded identity (individuals cannot be recognized from their data) and the results  
4 will be presented in a way in which no individual can be identified. Your personal information is  
5 securely protected and cannot be accessed by unauthorized persons. The identity code concerning  
6 research participants will be kept securely at the project leader's site.  
7

## 8 7 Responsible for the investigations 9

### 10 **Coordinating Investigator:**

11 Max Ortiz Catalan, Chalmers University of Technology, Institution for Electrical Engineering, 412 96  
12 Gothenburg.

13 E-mail: [maxo@chalmers.se](mailto:maxo@chalmers.se)

14 **Tel: + 46 (0) 708 46 10 65**  
15  
16  
17

18 Thank you for taking the time to read this information sheet.  
19  
20  
21  
22  
23  
24  
25  
26  
27  
28  
29  
30  
31  
32  
33  
34  
35  
36  
37  
38  
39  
40  
41  
42  
43  
44  
45  
46  
47  
48  
49  
50  
51  
52  
53  
54  
55  
56  
57  
58  
59  
60

## Appendix B – Extended Methods

### Interventions

Possible phantom movement for upper limb amputees are hand open and close, pronation and supination, wrist flexion and extension, elbow flexion and extension, flexion and extension of the individual fingers. Possible movements for lower limb amputees are knee extension and flexion, femoral rotation outwards and inwards, ankle plantar flexion and dorsiflexion, tibial rotation outwards and inwards, ankle eversion and inversion, flexion and extension of the toes. Upper and lower limb movements can be performed individually and simultaneously (more than two movements at the same time). Depending on the level of amputation, some movements are omitted from the treatment because they involve the residual rather than the phantom limb: e.g. elbow movements in transradial amputees. According to whether the subjects are assigned to the control or experimental intervention, they are asked to either imagine or execute these phantom movements as naturally and intuitively as possible.

### Experimental Treatment

A Phantom Motor Execution (PME) treatment session consists of the following components:

1. **Placement of electrodes and fiducial marker.** To place the electrode in an appropriate way, subjects are asked to execute different phantom movements while the stump is palpated to localize the muscles. Areas with excess of soft-tissue between muscles and skin are avoided. Four to eight bipolar superficial electrodes (pre-gelled, adhesive, Ag/AgCl, one cm diameter, and two cm inter-electrode distance) are then placed along the muscle fibres where possible, else one electrode is placed on the target muscle while the other is placed on a more electrically neutral area. In the case of transfemoral amputations, electrodes are placed according to the *targeted monopolar configuration* described in detail in reference: (Lendaro et al., 2017).
2. **PME training cycle** (see Figure B1)
  - a. **Recording session.** The subjects are asked to perform three repetitions of the movements as shown by a virtual limb alternated by rest periods. The standard contraction time is set to three seconds followed by three seconds of relaxation. However, this time might be increased in case longer time is required to complete the phantom movement. This step is necessary to collect myoelectric data used to train the motor volition decoding algorithms. The movements performed are dictated by the current level of difficulty (see “Levels of difficulty”).
  - b. **Phantom motor execution in augmented reality (AR).** The subjects are then asked to control the virtual limb by performing the movements previously trained.
  - c. **Serious gaming.** Each phantom movement trained during the recording session is then paired to activate a specific key on the computer keyboard. Computer games that would normally be controlled by those keys can then be controlled by the phantom movements, enabling the control of the game through *phantom motor execution*.
  - d. **Target achievement control (TAC) test.** In this part of the training cycle the subjects are asked to move a virtual limb aiming to match a target posture determined by the movements previously trained. The target posture is considered achieved when the subject is able to position the virtual limb within  $\pm 5$  degrees range in less than 20 seconds, and hold it for a two-second dwell interval. The trained movements are randomly requested six times each. This test was originally designed to evaluate control strategies for multi-functional prosthetic devices represented in virtual reality (Simon et al., 2011) In this study, the TAC test is used only for rehabilitation purposes and it is used as implemented in our open source platform named BioPatRec (Ortiz-Catalan et al., 2013).

3. **Outcomes evaluation.** Depending on the specific visit different outcome measures are recorded by blind evaluators at the end of the treatment, as reported in Table 2.

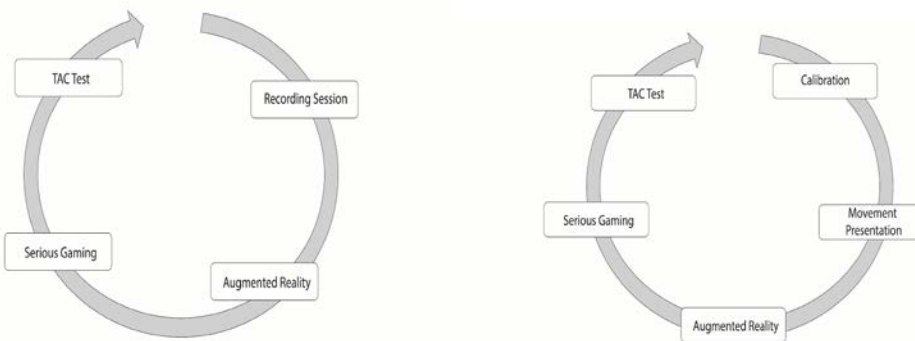

Figure B1: Training cycle for the Phantom Motor Execution (PME) intervention (left) and Phantom Motor Imagery (PMI) intervention (right)

### Control Treatment

A Phantom Motor Imagery (PMI) treatment session consists of the same components as the experimental intervention, however there are some differences in the treatment cycle (see Figure B1), which are listed below:

- **Calibration.** The training cycle starts with the calibration. During this step, the patient is asked to relax the muscles completely and stay still. This phase is required in order to set the relaxation or “non-activity” level and enable the detection of contractions associated with unwanted motor execution.
- **Movement presentation.** This step is the analogue of the recording session in the experimental treatment and is meant to present a sequence of selected movements to the subject. The movements are chosen based on an increasing level of difficulty (see “Levels of difficulty”). Every movement is presented three times, for a period of three seconds in each repetition, and alternated by rest periods of equal length. During this phase the subject is asked to practice the imagination of the movements.
- **Serious gaming.** In the gaming step, the subjects will control the game using the keyboard with an able limb. No imagination is required for this step. However, the patient is expected to engage in an entertaining activity and divert cognitive resources that would be otherwise devoted to pain processing. Bilateral upper limb amputees will use a joystick with any able limb.
- **Phantom motor execution in augmented reality (AR) and TAC test.** The subjects are asked to imagine being in control of the movements autonomously performed by the virtual limb in both AR and VR environments.

### Levels of difficulty

Interventions can be performed at five levels of difficulty. Subjects start at the easiest level and advance to the next level following different modalities depending on their intervention group. Subjects assigned to the PME group move to the next level when they achieve 85%-100% completion rate in the TAC test. If subjects are unable to achieve over 30% of completion rate in the new level, they are advised to move back to the previous level. On the other hand, subjects assigned to the PMI group are instructed on the specific amount of time to spend in each level, which increases with the number of degrees of freedom (DoF) exercised within the same treatment cycle.

- Level 1: Individual movements (1 DoF).



- Level 2: Individual movements (2 DoF). In the second level more than two movements are requested within the same training cycle while keeping each movement independent.
- Level 3: Simultaneous movements (2 DoF). Subjects are required to combine more than one DoF, i.e. pronation while opening or closing the hand, or supination while opening or closing the hand.
- Level 4: Individual movements (3 DoF).
- Level 5: Simultaneous movements (3 DoF).

For peer review only

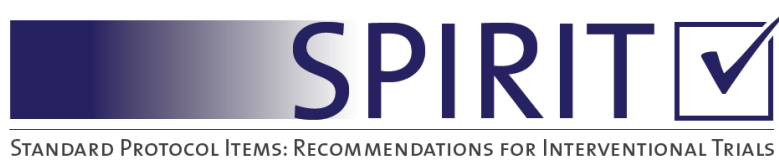

SPIRIT 2013 Checklist: Recommended items to address in a clinical trial protocol and related documents\*

| Section/item                      | ItemNo | Description                                                                                                                                                                                                                                                                              | Page  |
|-----------------------------------|--------|------------------------------------------------------------------------------------------------------------------------------------------------------------------------------------------------------------------------------------------------------------------------------------------|-------|
| <b>Administrative information</b> |        |                                                                                                                                                                                                                                                                                          |       |
| Title                             | 1      | Descriptive title identifying the study design, population, interventions, and, if applicable, trial acronym                                                                                                                                                                             | 1     |
| Trial registration                | 2a     | Trial identifier and registry name. If not yet registered, name of intended registry                                                                                                                                                                                                     | 2     |
|                                   | 2b     | All items from the World Health Organization Trial Registration Data Set                                                                                                                                                                                                                 | 3-5   |
| Protocol version                  | 3      | Date and version identifier                                                                                                                                                                                                                                                              | 5     |
| Funding                           | 4      | Sources and types of financial, material, and other support                                                                                                                                                                                                                              | 5     |
| Roles and responsibilities        | 5a     | Names, affiliations, and roles of protocol contributors                                                                                                                                                                                                                                  | 5     |
|                                   | 5b     | Name and contact information for the trial sponsor                                                                                                                                                                                                                                       | 5     |
|                                   | 5c     | Role of study sponsor and funders, if any, in study design; collection, management, analysis, and interpretation of data; writing of the report; and the decision to submit the report for publication, including whether they will have ultimate authority over any of these activities | 5     |
|                                   | 5d     | Composition, roles, and responsibilities of the coordinating centre, steering committee, endpoint adjudication committee, data management team, and other individuals or groups overseeing the trial, if applicable (see Item 21a for data monitoring committee)                         | 5, 17 |
| <b>Introduction</b>               |        |                                                                                                                                                                                                                                                                                          |       |
| Background and rationale          | 6a     | Description of research question and justification for undertaking the trial, including summary of relevant studies (published and unpublished) examining benefits and harms for each intervention                                                                                       | 6,7   |
|                                   | 6b     | Explanation for choice of comparators                                                                                                                                                                                                                                                    | 7     |

|                                                           |     |                                                                                                                                                                                                                                                                                                                                                                                |                 |
|-----------------------------------------------------------|-----|--------------------------------------------------------------------------------------------------------------------------------------------------------------------------------------------------------------------------------------------------------------------------------------------------------------------------------------------------------------------------------|-----------------|
| Objectives                                                | 7   | Specific objectives or hypotheses                                                                                                                                                                                                                                                                                                                                              | 7               |
| Trial design                                              | 8   | Description of trial design including type of trial (eg, parallel group, crossover, factorial, single group), allocation ratio, and framework (eg, superiority, equivalence, noninferiority, exploratory)                                                                                                                                                                      | 8               |
| <b>Methods: Participants, interventions, and outcomes</b> |     |                                                                                                                                                                                                                                                                                                                                                                                |                 |
| Study setting                                             | 9   | Description of study settings (eg, community clinic, academic hospital) and list of countries where data will be collected. Reference to where list of study sites can be obtained                                                                                                                                                                                             | 8               |
| Eligibility criteria                                      | 10  | Inclusion and exclusion criteria for participants. If applicable, eligibility criteria for study centres and individuals who will perform the interventions (eg, surgeons, psychotherapists)                                                                                                                                                                                   | 8,9             |
| Interventions                                             | 11a | Interventions for each group with sufficient detail to allow replication, including how and when they will be administered                                                                                                                                                                                                                                                     | 8-9, Appendix B |
|                                                           | 11b | Criteria for discontinuing or modifying allocated interventions for a given trial participant (eg, drug dose change in response to harms, participant request, or improving/worsening disease)                                                                                                                                                                                 | 12              |
|                                                           | 11c | Strategies to improve adherence to intervention protocols, and any procedures for monitoring adherence (eg, drug tablet return, laboratory tests)                                                                                                                                                                                                                              | 8               |
|                                                           | 11d | Relevant concomitant care and interventions that are permitted or prohibited during the trial                                                                                                                                                                                                                                                                                  | 9               |
| Outcomes                                                  | 12  | Primary, secondary, and other outcomes, including the specific measurement variable (eg, systolic blood pressure), analysis metric (eg, change from baseline, final value, time to event), method of aggregation (eg, median, proportion), and time point for each outcome. Explanation of the clinical relevance of chosen efficacy and harm outcomes is strongly recommended | 12-14           |
| Participant timeline                                      | 13  | Time schedule of enrolment, interventions (including any run-ins and washouts), assessments, and visits for participants. A schematic diagram is highly recommended (see Figure)                                                                                                                                                                                               | 10,16           |

|                                                                     |     |                                                                                                                                                                                                                                                                                                                                                                                                              |    |
|---------------------------------------------------------------------|-----|--------------------------------------------------------------------------------------------------------------------------------------------------------------------------------------------------------------------------------------------------------------------------------------------------------------------------------------------------------------------------------------------------------------|----|
| Sample size                                                         | 14  | Estimated number of participants needed to achieve study objectives and how it was determined, including clinical and statistical assumptions supporting any sample size calculations                                                                                                                                                                                                                        | 14 |
| Recruitment                                                         | 15  | Strategies for achieving adequate participant enrolment to reach target sample size                                                                                                                                                                                                                                                                                                                          | 8  |
| <b>Methods: Assignment of interventions (for controlled trials)</b> |     |                                                                                                                                                                                                                                                                                                                                                                                                              |    |
| Allocation:                                                         |     |                                                                                                                                                                                                                                                                                                                                                                                                              |    |
| Sequence generation                                                 | 16a | Method of generating the allocation sequence (eg, computer-generated random numbers), and list of any factors for stratification. To reduce predictability of a random sequence, details of any planned restriction (eg, blocking) should be provided in a separate document that is unavailable to those who enrol participants or assign interventions                                                     | 14 |
| Allocation concealment mechanism                                    | 16b | Mechanism of implementing the allocation sequence (eg, central telephone; sequentially numbered, opaque, sealed envelopes), describing any steps to conceal the sequence until interventions are assigned                                                                                                                                                                                                    | 14 |
| Implementation                                                      | 16c | Who will generate the allocation sequence, who will enrol participants, and who will assign participants to interventions                                                                                                                                                                                                                                                                                    | 14 |
| Blinding (masking)                                                  | 17a | Who will be blinded after assignment to interventions (eg, trial participants, care providers, outcome assessors, data analysts), and how                                                                                                                                                                                                                                                                    | 15 |
|                                                                     | 17b | If blinded, circumstances under which unblinding is permissible, and procedure for revealing a participant's allocated intervention during the trial                                                                                                                                                                                                                                                         | 17 |
| <b>Methods: Data collection, management, and analysis</b>           |     |                                                                                                                                                                                                                                                                                                                                                                                                              |    |
| Data collection methods                                             | 18a | Plans for assessment and collection of outcome, baseline, and other trial data, including any related processes to promote data quality (eg, duplicate measurements, training of assessors) and a description of study instruments (eg, questionnaires, laboratory tests) along with their reliability and validity, if known. Reference to where data collection forms can be found, if not in the protocol | 17 |

|                                 |     |                                                                                                                                                                                                                                                                                                                                       |           |
|---------------------------------|-----|---------------------------------------------------------------------------------------------------------------------------------------------------------------------------------------------------------------------------------------------------------------------------------------------------------------------------------------|-----------|
|                                 | 18b | Plans to promote participant retention and complete follow-up, including list of any outcome data to be collected for participants who discontinue or deviate from intervention protocols                                                                                                                                             | 13        |
| Data management                 | 19  | Plans for data entry, coding, security, and storage, including any related processes to promote data quality (eg, double data entry; range checks for data values). Reference to where details of data management procedures can be found, if not in the protocol                                                                     | 17        |
| Statistical methods             | 20a | Statistical methods for analysing primary and secondary outcomes. Reference to where other details of the statistical analysis plan can be found, if not in the protocol                                                                                                                                                              | 17,18     |
|                                 | 20b | Methods for any additional analyses (eg, subgroup and adjusted analyses)                                                                                                                                                                                                                                                              | 17,18     |
|                                 | 20c | Definition of analysis population relating to protocol non-adherence (eg, as randomised analysis), and any statistical methods to handle missing data (eg, multiple imputation)                                                                                                                                                       | 12, 17,18 |
| <b>Methods: Monitoring</b>      |     |                                                                                                                                                                                                                                                                                                                                       |           |
| Data monitoring                 | 21a | Composition of data monitoring committee (DMC); summary of its role and reporting structure; statement of whether it is independent from the sponsor and competing interests; and reference to where further details about its charter can be found, if not in the protocol. Alternatively, an explanation of why a DMC is not needed | NA        |
|                                 | 21b | Description of any interim analyses and stopping guidelines, including who will have access to these interim results and make the final decision to terminate the trial                                                                                                                                                               | NA        |
| Harms                           | 22  | Plans for collecting, assessing, reporting, and managing solicited and spontaneously reported adverse events and other unintended effects of trial interventions or trial conduct                                                                                                                                                     | 17        |
| Auditing                        | 23  | Frequency and procedures for auditing trial conduct, if any, and whether the process will be independent from investigators and the sponsor                                                                                                                                                                                           | 17        |
| <b>Ethics and dissemination</b> |     |                                                                                                                                                                                                                                                                                                                                       |           |

|                               |     |                                                                                                                                                                                                                                                                                     |            |
|-------------------------------|-----|-------------------------------------------------------------------------------------------------------------------------------------------------------------------------------------------------------------------------------------------------------------------------------------|------------|
| Research ethics approval      | 24  | Plans for seeking research ethics committee/institutional review board (REC/IRB) approval                                                                                                                                                                                           | 18         |
| Protocol amendments           | 25  | Plans for communicating important protocol modifications (eg, changes to eligibility criteria, outcomes, analyses) to relevant parties (eg, investigators, REC/IRBs, trial participants, trial registries, journals, regulators)                                                    | 18         |
| Consent or assent             | 26a | Who will obtain informed consent or assent from potential trial participants or authorised surrogates, and how (see Item 32)                                                                                                                                                        | 8          |
|                               | 26b | Additional consent provisions for collection and use of participant data and biological specimens in ancillary studies, if applicable                                                                                                                                               | NA         |
| Confidentiality               | 27  | How personal information about potential and enrolled participants will be collected, shared, and maintained in order to protect confidentiality before, during, and after the trial                                                                                                | 17         |
| Declaration of interests      | 28  | Financial and other competing interests for principal investigators for the overall trial and each study site                                                                                                                                                                       | 6          |
| Access to data                | 29  | Statement of who will have access to the final trial dataset, and disclosure of contractual agreements that limit such access for investigators                                                                                                                                     | 17,18      |
| Ancillary and post-trial care | 30  | Provisions, if any, for ancillary and post-trial care, and for compensation to those who suffer harm from trial participation                                                                                                                                                       | 8          |
| Dissemination policy          | 31a | Plans for investigators and sponsor to communicate trial results to participants, healthcare professionals, the public, and other relevant groups (eg, via publication, reporting in results databases, or other data sharing arrangements), including any publication restrictions | 18         |
|                               | 31b | Authorship eligibility guidelines and any intended use of professional writers                                                                                                                                                                                                      | 19         |
|                               | 31c | Plans, if any, for granting public access to the full protocol, participant-level dataset, and statistical code                                                                                                                                                                     | 19         |
| <b>Appendices</b>             |     |                                                                                                                                                                                                                                                                                     |            |
| Informed consent materials    | 32  | Model consent form and other related documentation given to participants and authorised surrogates                                                                                                                                                                                  | Appendix A |

|                                                                                                                                                                                                                                                                                                                                                             |                      |    |                                                                                                                                                                                                |    |
|-------------------------------------------------------------------------------------------------------------------------------------------------------------------------------------------------------------------------------------------------------------------------------------------------------------------------------------------------------------|----------------------|----|------------------------------------------------------------------------------------------------------------------------------------------------------------------------------------------------|----|
| 1<br>2<br>3<br>4<br>5<br>6<br>7<br>8<br>9<br>10<br>11<br>12<br>13<br>14<br>15<br>16<br>17<br>18<br>19<br>20<br>21<br>22<br>23<br>24<br>25<br>26<br>27<br>28<br>29<br>30<br>31<br>32<br>33<br>34<br>35<br>36<br>37<br>38<br>39<br>40<br>41<br>42<br>43<br>44<br>45<br>46<br>47<br>48<br>49<br>50<br>51<br>52<br>53<br>54<br>55<br>56<br>57<br>58<br>59<br>60 | Biological specimens | 33 | Plans for collection, laboratory evaluation, and storage of biological specimens for genetic or molecular analysis in the current trial and for future use in ancillary studies, if applicable | NA |
|-------------------------------------------------------------------------------------------------------------------------------------------------------------------------------------------------------------------------------------------------------------------------------------------------------------------------------------------------------------|----------------------|----|------------------------------------------------------------------------------------------------------------------------------------------------------------------------------------------------|----|

\*It is strongly recommended that this checklist be read in conjunction with the SPIRIT 2013 Explanation & Elaboration for important clarification on the items. Amendments to the protocol should be tracked and dated. The SPIRIT checklist is copyrighted by the SPIRIT Group under the Creative Commons "[Attribution-NonCommercial-NoDerivs 3.0 Unported](https://creativecommons.org/licenses/by-nc-nd/3.0/)" license.

For peer review only

# BMJ Open

## Phantom Motor Execution as a treatment for Phantom Limb Pain: Protocol of an international, double-blind, randomised, controlled clinical trial.

|                                 |                                                                                                                                                                                                                                                                                                                                                                                                                                                                                                                                                                                                                                                                                                                                                                                                                                                                                                                                                                                                                                                                                                                                                                                                                                                                                                                                                                                                                                                                                                                                                                |
|---------------------------------|----------------------------------------------------------------------------------------------------------------------------------------------------------------------------------------------------------------------------------------------------------------------------------------------------------------------------------------------------------------------------------------------------------------------------------------------------------------------------------------------------------------------------------------------------------------------------------------------------------------------------------------------------------------------------------------------------------------------------------------------------------------------------------------------------------------------------------------------------------------------------------------------------------------------------------------------------------------------------------------------------------------------------------------------------------------------------------------------------------------------------------------------------------------------------------------------------------------------------------------------------------------------------------------------------------------------------------------------------------------------------------------------------------------------------------------------------------------------------------------------------------------------------------------------------------------|
| Journal:                        | <i>BMJ Open</i>                                                                                                                                                                                                                                                                                                                                                                                                                                                                                                                                                                                                                                                                                                                                                                                                                                                                                                                                                                                                                                                                                                                                                                                                                                                                                                                                                                                                                                                                                                                                                |
| Manuscript ID                   | bmjopen-2017-021039.R2                                                                                                                                                                                                                                                                                                                                                                                                                                                                                                                                                                                                                                                                                                                                                                                                                                                                                                                                                                                                                                                                                                                                                                                                                                                                                                                                                                                                                                                                                                                                         |
| Article Type:                   | Protocol                                                                                                                                                                                                                                                                                                                                                                                                                                                                                                                                                                                                                                                                                                                                                                                                                                                                                                                                                                                                                                                                                                                                                                                                                                                                                                                                                                                                                                                                                                                                                       |
| Date Submitted by the Author:   | 03-Apr-2018                                                                                                                                                                                                                                                                                                                                                                                                                                                                                                                                                                                                                                                                                                                                                                                                                                                                                                                                                                                                                                                                                                                                                                                                                                                                                                                                                                                                                                                                                                                                                    |
| Complete List of Authors:       | Lendaro, Eva; Chalmers tekniska hogskola, Electrical Engineering<br>Hermansson, Liselotte; University Health Care Research Centre, Faculty of Medicine and Health, Örebro University; Department of Prosthetics and Orthotics, Faculty of Medicine and Health, Örebro University Hospital,<br>Burger, Helena; University Rehabilitation Institute; University of Ljubljana, Faculty of Medicine<br>Van der Sluis, Corry; University of Groningen, University Medical Center Groningen, Rehabilitation Medicine<br>McGuire, Brian; National University of Ireland, Galway, Ireland, School of Psychology & Centre for Pain Research<br>Pilch, Monika; National University of Ireland, Galway, Ireland, School of Psychology & Centre for Pain Research<br>Bunketorp-Käll, Lina; Sahlgrenska University Hospital, Centre for Advanced Reconstruction of Extremities<br>Kulbacka-Ortiz, Katarzyna; Sahlgrenska University Hospital, Centre for Advanced Reconstruction of Extremities<br>Rignér, Ingrid ; Sahlgrenska universitetssjukhuset, Gåskolan/Ortopedteknik<br>Stockselius, Anita; Rehabcenter Sfären, Bräcke Diakoni<br>Gudmundson, Lena; Rehabcenter Sfären, Bräcke Diakoni<br>Widehammar, Cathrine; University Health Care Research Centre, Faculty of Medicine and Health, Örebro University<br>Hill, Wendy; University of New Brunswick, Institute of Biomedical Engineering<br>Geers, Sybille; Fysische Geneeskunde en Revalidatie, University Hospital Gent<br>Ortiz-Catalan, Max; Chalmers tekniska hogskola, Electrical Engineering; Integrum AB |
| <b>Primary Subject Heading</b>: | Rehabilitation medicine                                                                                                                                                                                                                                                                                                                                                                                                                                                                                                                                                                                                                                                                                                                                                                                                                                                                                                                                                                                                                                                                                                                                                                                                                                                                                                                                                                                                                                                                                                                                        |
| Secondary Subject Heading:      | Research methods, Occupational and environmental medicine, Sports and exercise medicine                                                                                                                                                                                                                                                                                                                                                                                                                                                                                                                                                                                                                                                                                                                                                                                                                                                                                                                                                                                                                                                                                                                                                                                                                                                                                                                                                                                                                                                                        |
| Keywords:                       | Neurological pain < NEUROLOGY, Clinical trials < THERAPEUTICS, REHABILITATION MEDICINE                                                                                                                                                                                                                                                                                                                                                                                                                                                                                                                                                                                                                                                                                                                                                                                                                                                                                                                                                                                                                                                                                                                                                                                                                                                                                                                                                                                                                                                                         |
|                                 |                                                                                                                                                                                                                                                                                                                                                                                                                                                                                                                                                                                                                                                                                                                                                                                                                                                                                                                                                                                                                                                                                                                                                                                                                                                                                                                                                                                                                                                                                                                                                                |



1  
2  
3  
4  
5  
6  
7  
8  
9  
10  
11  
12  
13  
14  
15  
16  
17  
18  
19  
20  
21  
22  
23  
24  
25  
26  
27  
28  
29  
30  
31  
32  
33  
34  
35  
36  
37  
38  
39  
40  
41  
42  
43  
44  
45  
46  
47  
48  
49  
50  
51  
52  
53  
54  
55  
56  
57  
58  
59  
60

SCHOLARONE™  
Manuscripts

For peer review only

# Phantom Motor Execution as a treatment for Phantom Limb Pain: Protocol of an international, double-blind, randomised, controlled clinical trial.

Eva Lendaro<sup>1</sup>, Liselotte Hermanson<sup>2,3</sup>, Helena Burger<sup>4,5</sup>, Corry van der Sluis<sup>6</sup>, Brian E. McGuire<sup>7</sup>, Monika Pilch<sup>7</sup>, Lina Bunketorp-Käll<sup>8</sup>, Katarzyna Kulbacka-Ortiz<sup>8</sup>, Ingrid Rignér<sup>9</sup>, Anita Stocksélius<sup>10</sup>, Lena Gudmundson<sup>10</sup>, Cathrine Widehammar<sup>3</sup>, Wendy Hill<sup>11</sup>, Sybille Geers<sup>12</sup>, and Max Ortiz-Catalan<sup>1,13</sup>

<sup>1</sup> Biomechatronics and Neurorehabilitation Laboratory, Department of Electrical Engineering, Chalmers University of Technology, Gothenburg, Sweden

<sup>2</sup> Department of Prosthetics and Orthotics, Faculty of Medicine and Health, Örebro University Hospital, Örebro, Sweden

<sup>3</sup> Faculty of Medicine and Health, University Health Care Research Centre, Örebro University, Örebro, Sweden

<sup>4</sup> University Rehabilitation Institute, Ljubljana, Slovenia

<sup>5</sup> Faculty of Medicine, University of Ljubljana, Ljubljana, Slovenia

<sup>6</sup> University of Groningen, University Medical Centre Groningen, Department of Rehabilitation Medicine, Groningen, Netherlands

<sup>7</sup> School of Psychology & Centre for Pain Research, National University of Ireland, Galway, Ireland.

<sup>8</sup> Centre for Advanced Reconstruction of Extremities, Sahlgrenska University Hospital, Gothenburg, Sweden.

<sup>9</sup> Gåskolan/Ortopedteknik, Sahlgrenska University Hospital, Gothenburg, Sweden.

<sup>10</sup> Rehabcenter Sfären, Bräcke Diakoni, Stockholm, Sweden.

<sup>11</sup> Institute of Biomedical Engineering, University of New Brunswick, New Brunswick, Canada.

<sup>12</sup> Fysische Geneeskunde en Revalidatie, University Hospital Gent, Gent, Belgium.

<sup>13</sup> Integrum AB, Mölndal, Sweden.

Correspondence to: Dr. Max Ortiz-Catalan maxo@chalmers.se

## Abstract

**Introduction:** Phantom limb pain (PLP) is a chronic condition that can greatly diminish quality of life. Control over the phantom limb and exercise of such control have been hypothesized to reverse maladaptive brain changes correlated to PLP. Preliminary investigations have shown that decoding motor volition using myoelectric pattern recognition, while providing real-time feedback via virtual and augmented reality (VR-AR), facilitates phantom motor execution (PME) and reduces PLP.

Here we present the study protocol for an international (seven countries), multicentre (nine clinics), double-blind, randomized, controlled clinical trial to assess the effectiveness of PME in alleviating PLP.

**Methods and analysis:** Sixty-seven subjects suffering from PLP in upper or lower limbs are randomly assigned to PME or Phantom Motor Imagery (PMI) interventions. Subjects allocated to either treatment receive 15 interventions and are exposed to the same VR-AR environments using the same device. The only difference between interventions is whether phantom movements are actually performed (PME) or just imagined (PMI). Complete evaluations are conducted at baseline and at intervention completion, as well as 1, 3 and 6 months later using an intention to treat approach. Changes in PLP measured using the Pain Rating Index between the first and last session are the primary measure of efficacy. Secondary outcomes include: frequency, duration, quality of pain, intrusion of pain in activities of daily living and sleep, disability associated to pain, pain self-efficacy, frequency of depressed mood, presence of

1  
2  
3 catastrophizing thinking, health-related quality of life and clinically significant change as patient's own  
4 impression. Follow-up interviews are conducted up to six months after the treatment.  
5

6 **Ethics and dissemination:** The study is performed in agreement with the Declaration of Helsinki, and  
7 under approval by the governing ethical committees of each participating clinic. The results will be  
8 published according to the CONSORT guidelines in a peer-reviewed journal.  
9

## 10 Strengths and limitations of this study

### 11 Strengths

- 12 • This study involves a number of participants (>60) such to provide appropriate power to draw  
13 meaningful conclusions.
- 14 • This study is double-blinded, randomized, conducted in geographically different locations and  
15 involves subjects with both upper and lower limb amputations, thus enhancing generalizability.
- 16 • The choice of the comparator allows controlling in a stringent manner for the effect of the key  
17 factor hypothesized as the cause of pain reduction, namely, the execution of phantom limb  
18 movements.  
19

### 20 Limitations

- 21 • Treatment is limited to 15 sessions, which might not be enough to alleviate pain in all  
22 participants.
- 23 • The nature of the experimental treatment (PME) does not allow inclusion of individuals from  
24 which myoelectric signals cannot be recorded from the muscles in their residual limbs.  
25

### 26 Trial Registration

| 27 DATA CATEGORY                                 | 28 INFORMATION                                                                                                                                                                                                                                                                                       |
|--------------------------------------------------|------------------------------------------------------------------------------------------------------------------------------------------------------------------------------------------------------------------------------------------------------------------------------------------------------|
| 29 Primary registry and trial identifying number | 30 ClinicalTrials.gov NCT03112928                                                                                                                                                                                                                                                                    |
| 31 Source(s) of monetary or material support     | 32 Promobilia foundation (F16501), VINNOVA<br>33 (Medtech4Health 2016-02290), EFIC Grünenthal Grant<br>34 (358041552) and Integrum AB (sponsor).<br>35                                                                                                                                               |
| 36 Coordinator                                   | 37 Chalmers University of Technology, Sweden<br>38                                                                                                                                                                                                                                                   |
| 39 Investigational sites                         | 40 Sahlgrenska University Hospital, Sweden<br>41 Örebro University, Sweden<br>42 Bräcke Diakoni, Sweden<br>43 University Rehabilitation Institute, Slovenia<br>44 Ghent University Hospital, Belgium<br>45<br>46<br>47<br>48<br>49<br>50<br>51<br>52<br>53<br>54<br>55<br>56<br>57<br>58<br>59<br>60 |

| DATA CATEGORY                             | INFORMATION                                                                                                                                                                                                                                                                        |
|-------------------------------------------|------------------------------------------------------------------------------------------------------------------------------------------------------------------------------------------------------------------------------------------------------------------------------------|
|                                           | University Medical Center Groningen, The Netherlands<br>The University of New Brunswick, Canada<br>National University of Ireland, Galway, Ireland<br>Ruhr-University Bochum, Germany                                                                                              |
| Sponsor                                   | Integrum AB                                                                                                                                                                                                                                                                        |
| Contact for public queries                | Eva Lendaro, MSc, +46704231352<br>lendaro@chalmers.se                                                                                                                                                                                                                              |
| Contact for scientific queries            | Max Ortiz Catalan, PhD, +46708461065<br><a href="mailto:maxo@chalmers.se">maxo@chalmers.se</a>                                                                                                                                                                                     |
| Public title                              | <i>Phantom Motor Execution as a Treatment of Phantom Limb Pain</i>                                                                                                                                                                                                                 |
| Scientific title                          | <i>Phantom Motor Execution Via Myoelectric Pattern Recognition, Virtual and Augmented Reality, and Serious Gaming as a Treatment of Phantom Limb Pain</i>                                                                                                                          |
| Countries of recruitment                  | Sweden, Slovenia, Netherlands, Belgium, Ireland, Canada, Germany                                                                                                                                                                                                                   |
| Health condition(s) or problem(s) studied | Phantom Limb Pain                                                                                                                                                                                                                                                                  |
| Intervention(s)                           | Experimental: Phantom Motor Execution<br><br>Control: Phantom Motor Imagery                                                                                                                                                                                                        |
| Key eligibility criteria                  | <ul style="list-style-type: none"> <li>• The participants must be older than 18 years with chronic PLP</li> <li>• People with acute PLP are non-eligible. At least six months should have passed since amputation</li> <li>• In case of pharmacological treatments, the</li> </ul> |

| DATA CATEGORY | INFORMATION                                                                                                                                                                                                                                                                                                                                                                                                                                                                                                                                                                                                                                                                                                                                                                                                                                                                                                                                                                                                                                                                                                                                                                                                                                                                                                                                                                                                    |
|---------------|----------------------------------------------------------------------------------------------------------------------------------------------------------------------------------------------------------------------------------------------------------------------------------------------------------------------------------------------------------------------------------------------------------------------------------------------------------------------------------------------------------------------------------------------------------------------------------------------------------------------------------------------------------------------------------------------------------------------------------------------------------------------------------------------------------------------------------------------------------------------------------------------------------------------------------------------------------------------------------------------------------------------------------------------------------------------------------------------------------------------------------------------------------------------------------------------------------------------------------------------------------------------------------------------------------------------------------------------------------------------------------------------------------------|
|               | <p>dosage must have been stable for the last month</p> <ul style="list-style-type: none"> <li>• Any previous PLP treatment must have terminated at least 3 months prior to commencing the study</li> <li>• Any pain reduction potentially attributable to previous PLP treatments must have occurred at least 3 months prior to commencing the study</li> <li>• Voluntary control over at least a portion of biceps and triceps muscles in case of upper limb amputation, or quadriceps and hamstrings in case of lower limb amputation.</li> <li>• Stable prosthetic situation (i.e. satisfaction with the fitting of the prosthesis) or being a non-user.</li> <li>• The participant should not have cognitive impairment that prevents them from following instructions.</li> <li>• No abundant soft tissue on the stump that prevents sufficient myoelectric signals from being recorded.</li> <li>• No presence of pain &gt; 2 on a numeric rating scale (NRS) upon contact with the skin or muscle contraction in the stump</li> <li>• The PLP must not be aggravated (NRS &gt; 4) by the execution or imagination of phantom movements</li> <li>• No condition associated with risk of poor protocol compliance</li> <li>• No injury, disease or addiction that would render the individual unsuitable for the trial</li> <li>• Pain Rating Index &gt; 0 as assessed in the Q-PLP at Visit 0</li> </ul> |
| Study type    | <p>Interventional<br/> Allocation: randomized<br/> Intervention model: parallel assignment<br/> Masking: double-blind (participant, evaluator)<br/> Primary purpose: treatment</p>                                                                                                                                                                                                                                                                                                                                                                                                                                                                                                                                                                                                                                                                                                                                                                                                                                                                                                                                                                                                                                                                                                                                                                                                                             |

| DATA CATEGORY           | INFORMATION                                                       |
|-------------------------|-------------------------------------------------------------------|
| Date of first enrolment | May 8 <sup>th</sup> , 2017                                        |
| Target sample size      | 67                                                                |
| Recruitment status      | Recruiting                                                        |
| Primary outcome         | Change in Phantom Limb Pain as measured by the Pain Rating Index. |

#### Protocol version

Clinical investigation plan code 007 733, version 02, 2017-05-24.

#### Sponsor contact information

Trial Sponsor: Integrum AB

Contact name: Anna Borglin

Address: Krokslätts Fabriker 50, SE-431 37, Mölndal, Sweden

Telephone: +46 (0)31-760 10 60

Email: info@Integrum.se

#### Funding

This study was funded by the Promobilia foundation (F16501), VINNOVA (Medtech4Health 2016-02290), EFIC Grünenthal Grant (358041552), and Integrum AB (sponsor).

#### Role of study sponsor and funders

The sponsor (Integrum AB) provided the devices and materials used in this study. Neither the sponsor nor the funders (Promobilia, VINNOVA, EGG) had a role in the design of the present protocol.

#### Roles and responsibilities

MO-C is the coordinating investigator of the study and endpoint adjudication evaluator. EL is the monitor of the trial, independent from the sponsor, and responsible for data management. Each site is constituted by at least a principal investigator, a therapist, and a blinded-evaluator. Investigational sites are independent from each other and from the sponsor.

#### Authors' contributions

MO-C conceived the PME treatment. MO-C and EL reviewed the literature and designed the study. All authors provided feedback on the design of the trial. BMG and MP assisted in the selection of psychological measure. LB-K and KK-O coordinated the ethical applications. EL and MO-C drafted the manuscript. EL, LH, HB, CS, BMG, MP, LB-K, KK-O, IR, AS, LG, CW, WH, SG and MO-C revised the study

1  
2  
3 protocol and approved the final manuscript. The authors thank the patients that with their feedback  
4 helped to define the research questions, outcome measures and the patient advisers.  
5

### 6 Competing interests

7 The sponsor of this study (Integrum AB) is a for-profit organization that might commercialize the device  
8 used in this study (PME and PMI). MO-C was partially funded by Integrum AB. The core technology used  
9 in this study has been made freely available as open source by MO-C (machine learning, virtual reality  
10 and electronics). All the other authors declare no competing interests.  
11  
12

## 13 Introduction

14 Phantom limb pain (PLP) is a chronic condition commonly suffered by amputees.(1,2) Although more  
15 than 60 different treatments to alleviate PLP have been described in the literature,(3) controlled clinical  
16 trials on such treatments are scarce and tend to be of poor quality.(4) The clinical investigation  
17 presented in this protocol aims to evaluate the efficacy of Phantom Motor Execution (PME) in reducing  
18 Phantom Limb Pain (PLP) in an international, multi-centre, double blind, randomized, controlled clinical  
19 trial. PME is accomplished by using a system (Neuromotus, Integrum AB, Sweden) that employs  
20 myoelectric pattern recognition to predict motor volition (movements of the phantom limb), while  
21 providing real-time feedback to the patient in virtual and augmented reality (VR/AR) environments. This  
22 technology allows the application of serious gaming in the therapy. PME is a non-invasive, non-  
23 pharmacological, and engaging treatment with no identified side effects at present.(5,6)  
24  
25  
26  
27

28 The effectiveness of PME was initially explored in a single upper limb amputee, with satisfactory results  
29 reported.(5) Prior to the pilot study, the patient had shown resistance to a variety of treatments for 48  
30 years (including mirror therapy). After PME, the sustained level of pain reported by the patient was  
31 gradually reduced to pain-free periods. He and his family also reported less intrusion of PLP in sleep and  
32 activities of daily living (ADL). Finally, the patient also acquired the ability to freely move his phantom  
33 arm and hand, consistent with a recent study by Raffin and colleagues where they found that reduced  
34 capability of phantom movement was correlated with more severe PLP.(7)  
35  
36

37 In the light of the findings in the case study, a non-randomized clinical investigation on PME was  
38 conducted in subjects with chronic intractable upper limb PLP.(6) Fourteen patients, for whom  
39 conventional PLP treatments failed and who suffered from PLP for an average of 10 years, received 12  
40 treatment sessions of PME, each of 1.5 hours' duration. At the end of the treatment period, patients  
41 showed statistically and clinically significant improvements (approx. 50% reduction of PLP). Intrusion of  
42 PLP during sleep and ADL was also reduced by a similar degree. These improvements were still present  
43 up to 6 months' post-treatment.(6) More recently, PME was also demonstrated to be a viable treatment  
44 for PLP in lower limb amputations.(8)  
45  
46

47 Strong evidence shows that PLP is related to neuroplastic changes in the primary somatosensory cortex,  
48 suggesting that central maladaptive plasticity is responsible for its maintenance. Neuroplasticity-based  
49 approaches for the relief of PLP, such as motor imagery and mirror therapy, ultimately aim to regain  
50 brain circuitry from pain processing. Nonetheless, these approaches have been shown to be limited in  
51 their effectiveness.  
52  
53

54 Although the practice of motor imagery has been shown to normalize previously altered cortical maps  
55 and reduce PLP,(9) evidence from randomized clinical studies has also suggested that it can increase  
56  
57  
58

pain.(10) These seemingly contradictory findings suggest that motor imagery should not be used alone but combined with other interventions, such as graded motor imagery (11) or mirror therapy.(12)

Mirror therapy has demonstrated higher effectiveness than motor imagery in reducing pain,(10) however, it still cannot ensure that the patient performs movements with the phantom limb. For instance, it is enough for the patient to move their healthy arm to produce movement in the reflected limb. Whether a patient is actually engaging in execution of phantom limb movements is unknown. PME overcomes some of the methodological limitations of previous treatments by ensuring that central and peripheral mechanisms in motor control are activated during therapy.

## Study objective

This paper presents the study protocol for a RCT in which upper and lower limb amputees are treated. The investigation primarily aims at assessing the efficacy of PME aided by myoelectric pattern recognition, augmented and virtual reality, and serious gaming to reduce Phantom Limb Pain (PLP). In order to isolate the contribution of PME in alleviating PLP over potential placebo effects, Phantom Motor Imagery (PMI) is used in this study as an active control treatment.

The working hypothesis of PME is that execution of phantom limb movements would exploit competitive neuroplasticity and provide a more integral normalization of cortical, sub-cortical, and spinal circuits compared to interventions that do not enable integration of sensory and motor information. Therefore, in this superiority trial, we hypothesise that the participants receiving the experimental treatment (PME) to obtain a larger reduction in PLP levels than those randomized to the control treatment.

## Trial design

This clinical study is an international, multicentre, double-blind, randomised controlled trial. The study takes place in seven countries and involves nine clinics, which are listed in Table 1. Participants are randomly assigned to receive either the experimental or the control treatment in a 2:1 allocation ratio. The choice of the allocation ration was made in order to collect more data on the intervention of interest. Each patient is followed up for a period of six months, at the end of which they are given the choice to undergo the alternative treatment. The total duration of the study is expected to be approximately three years.

*Table 1: List of the investigational sites, divided by countries taking part to the international, multicenter randomized clinical trial.*

| Country     | Investigational site                                                                  |
|-------------|---------------------------------------------------------------------------------------|
| Sweden      | Sahlgrenska University Hospital, Gothenburg                                           |
|             | Örebro University Hospital, Örebro                                                    |
|             | Rehabcenter Sfären, Bräcke Diakoni, Stockholm                                         |
| Slovenia    | University Rehabilitation Institute, Ljubljana                                        |
| Belgium     | Fysische Geneeskunde en Revalidatie University Hospital Gent, Gent                    |
| Netherlands | Department of Rehabilitation Medicine, University Medical Centre Groningen, Groningen |
| Canada      | Institute of Biomedical Engineering, University of New Brunswick, New Brunswick       |
| Ireland     | Centre for Pain Research, National University of Ireland, Galway                      |
| Germany     | Department of Psychosomatic Medicine and Psychotherapy, LWL University                |



|                                          |
|------------------------------------------|
| Hospital, Ruhr-University Bochum, Bochum |
|------------------------------------------|

## Methods: Participants, interventions, and outcomes

A procedural overview of the trial is provided by the flow diagram of Figure 1. Recruitment of the participants is conducted via advertisements at local investigation clinics, on social media, and in local newspapers. People who are interested in taking part in the trial are invited to contact the principal investigator of the site, or a person appointed by the principal investigator, via phone or email.

### Eligibility criteria

Interested people are invited to a pre-assessment visit (Visit 0). On this occasion, the therapist (clinical investigator) explains the study in detail and answers all the questions that might arise. Afterwards, the participants are asked to provide written informed consent (see Appendix A). If consent is granted, eligibility to the study is assessed according to the criteria presented below:

- The participants must be older than 18 years with chronic PLP
- Participants must have chronic PLP - at least six months should have passed since amputation. Participants with acute PLP are non-eligible.
- In case of pharmacological treatments, the dosage must have been stable for the previous month
- Any previous PLP treatments must have terminated at least 3 months prior to entering the study
- Any pain reduction potentially attributable to previous PLP treatments must have occurred at least 3 months prior to entering the study
- Voluntary control over at least a portion of biceps and triceps muscles in case of upper limb amputation, or quadriceps and hamstrings in case of lower limb amputation.
- Stable prosthetic situation (i.e. satisfaction with the fitting of the prosthesis) or being a non-user.
- The subject should not have a cognitive impairment that prevents them from following instructions.
- No abundant soft tissue on the stump that prevents sufficient myoelectric signals from being recorded.
- No presence of pain > 2 on NRS upon contact with the skin or muscle contraction in the stump
- The PLP must not be aggravated (NRS > 4) by the execution or imagination of phantom movements
- No condition associated with risk of poor protocol compliance
- No injury, disease or addiction that would render the individual unsuitable for the trial
- Pain Rating Index (PRI) > 0 as assessed in the Questionnaire for Phantom Limb Pain (Q-PLP) at Visit 0

### Concomitant medications

Any co-intervention aiming to reduce PLP is prohibited during the trial. However, in the design of the trial it is acknowledged that there is a large possibility for patients with PLP to be high consumers of analgesic medicines. Therefore, the use of concomitant medications is allowed provided that at the time of inclusion, the patient has stable consumption for at least one month before entering the study and any pain reduction potentially attributable to the drug occurred at least three months before entering the study. Intake of pain medication in patients who show considerable improvement can be gradually reduced at the discretion of the responsible physician, given that the patient is followed up regularly.

1  
2  
3 Medication intake is thus monitored as an outcome variable called “need of concomitant medication”,  
4 which is used to describe and compare the amount of co-medication in the treatment groups.  
5

## 6 Interventions

7 All of the therapists at the clinics are introduced to the technology with at least one practical  
8 demonstration by the first (EL) and/or last author (MO-C). The therapists conduct the interventions  
9 independently, and periodically the first author monitors the correct execution of the protocol.  
10 Participants in both intervention groups receive 15 treatment sessions of 2 hours’ duration, including  
11 system setup and a blinded outcome assessment. The frequency of the sessions is chosen by the  
12 participant and can be once, twice (advised frequency), or five times per week, yielding a total patient  
13 duration that ranges between 28 and 40 weeks. Both treatment groups use the same device and set up,  
14 which are sketched in Figure 2. The only difference between the two groups is the type of interaction  
15 with the virtual environments (active: motor execution; or passive: motor imagery). Allocated  
16 interventions for a given trial participant cannot be modified. Dates of the treatment sessions are  
17 recorded.  
18  
19  
20

## 21 Experimental Treatment

22 In the PME intervention, motor volition is decoded by interpreting the signals from the stump muscles  
23 via myoelectric pattern recognition.(13,14) The decoded movement is visualized in the virtual  
24 environments (i.e. virtual limb or serious gaming). The end result is that the user, by training with the  
25 system, can achieve control over the virtual environments by performing phantom limb movements  
26 associated with kinetic sensations analogous to the ones pertaining to the limb prior to amputation.  
27  
28

29 A treatment session consists of the following steps:

- 30 1. Placement of the electrodes and fiducial marker;
- 31 2. Treatment cycles  
32     ○ Recording session  
33     ○ Practice of PME with VR/AR  
34     ○ Serious gaming using phantom movements  
35     ○ Practice of PME by matching random target postures of a virtual arm in VR (TAC  
36     Test,(15)).  
37
- 38 3. Pain evaluation (Q-PLP, see Outcomes section)  
39  
40

41 Different treatment cycles (step 2) are repeated during a treatment session in order to execute various  
42 phantom limb movements or combinations of movements. The level of difficulty gradually increases  
43 during the treatment phase from 1 to 5 by adding degrees of freedom to be trained within the same  
44 treatment cycle. In this context, a degree of freedom is any pair of movements performing opposite  
45 actions such as opening and closing of the hand, or extension and flexion of the knee.  
46  
47

48 Clinicians are instructed to advance the level of difficulty once the previous level is accomplished  
49 successfully, and revert to the previous level if the patient shows considerable difficulty accomplishing  
50 the tasks. More details on the acquisition of myoelectric signals, prediction of motor volition, the various  
51 parts of the treatment session, and the different levels of difficulty are presented in Appendix B.  
52

## 53 Control Treatment

54 In the control treatment (PMI), patients are not allowed to produce/execute phantom movements, but  
55 must imagine performing such movements while observing them executed autonomously by the VR/AR  
56  
57  
58

1  
2  
3 environments. The device is identical to the one used in the experimental treatment, but here the  
4 myoelectric signals are used to monitor that the patient does not produce muscular contractions, rather  
5 than decoding motor volition.  
6

7  
8 The control treatment session is conducted using the same step-wise procedure as the experimental  
9 group with the addition of a calibration step at the beginning of the treatment cycle. Calibration is  
10 necessary to set the threshold for myoelectric signals above which the system alerts the user that a  
11 muscular contraction is performed. As in PME, the treatment cycle is repeated for different imaginary  
12 phantom limb movements or a set of imaginary movements following the same levels of difficulty. In  
13 the game format, the participants control the game using the keyboard with an able limb. Bilateral  
14 upper limb amputees use a joystick with any able limb. Details on the methods are presented in  
15 Appendix B.  
16

### 17 **Withdrawal or termination of individual participants**

18 Participants are free to withdraw from participation in the study at any time upon request. An  
19 investigator may terminate participation in the study if:  
20

- 21 • Any clinical adverse event, clinical abnormality, or other medical condition or situation occurs  
22 such that continued participation in the study would not be in the best interest of the  
23 participant.  
24
- 25 • The participant no longer meets the eligibility criteria because of a condition newly developed or  
26 not previously recognized.  
27  
28

29 The main analysis will be conducted using the intention to treat (ITT) methodology. Missing data due to  
30 withdrawal or termination will be imputed using the 'last observation carried forward' method. From  
31 previous studies, the dropout rate is estimated at approximately 10% and this was taken into account  
32 for the calculation of the sample size.  
33

### 34 **Outcomes**

35 Outcomes will be evaluated at every treatment session and three follow-up assessments at one, three,  
36 and six months' post-treatment. The outcomes are measured by the evaluators following the participant  
37 treatment schedule presented in Table 2.  
38  
39

### 40 **Primary outcome measure**

41 The primary outcome of the study is the change in PLP intensity measured by the difference in Pain  
42 Rating Index (PRI) between baseline (Visit 0) and at the post-treatment assessment (Visit 15). The PRI is  
43 computed as the sum of the scores for all descriptors of the Short Form of the McGill Pain Questionnaire  
44 (SF-MPQ).(16) Within this study, the SF-MPQ is included in one more extensive survey named  
45 Questionnaire for Phantom Limb Pain (Q-PLP), which is described below in the secondary outcome  
46 measures.  
47  
48

### 49 **Secondary outcome measures**

50 Secondary outcomes consider different aspects related to PLP such as pain frequency, pain duration,  
51 quality of pain, intrusion of pain in activities of daily living and sleep, disability associated with pain, pain  
52 self-efficacy, mood, presence of catastrophizing thinking, health-related quality of life and the patient's  
53 own impression about the effect of treatment. The secondary outcome measures are:  
54  
55  
56  
57  
58

### *Pain Disability Index (PDI)*

Pain Disability Index, a 7-item questionnaire designed to investigate the extent to which chronic pain interferes with a person's ability to engage in various life activities.(17) An over-all pain disability index score is obtained by summing the numerical ratings of the questionnaire's single items.

### *Questionnaire for Phantom Limb Pain (Q-PLP)*

The Q-PLP is a 16-item questionnaire based on a combination of the SF-MPQ (Melzack 1987) and study-specific questions use in previous studies ((6,8,5)). The part containing the SF-MPQ is used for the calculation of the Pain Rating Index (primary outcome measure).

The Q-PLP assesses intensity, quality, duration, and frequency of phantom limb pain using the following metrics: the numeric rating scale (scale range 0 - 10) to assess the intensity of pain at present; the weighted pain distribution (scale range 0 - 5) to capture the time-varying nature of chronic pain by adding the contributions of weighted portions of time spent in six pain levels (present pain intensity scale,(18)); and a study-specific descriptive scale of seven steps: "never", "once per month", "once per week", "few times per week", "once per day", "few times per day", and "always" to measure the frequency of pain.

In addition, the Q-PLP is used to monitor the intensity of stump pain, phantom limb sensations, phantom motor ability, intrusion of phantom limb pain in activities of daily living and sleep, by one question each using a numeric rating scale. Changes in prosthetic hardware, medication, presence of telescoping (feeling that the phantom limb is gradually shortening over time), and location of pain are also monitored by the Q-PLP.

### *Euroqol-5D-5L (EQ-5D-5L)*

The EQ-5D-5L is a standardised questionnaire used to investigate health-related quality of life which is constituted by two components: health status and health evaluation.(19) Health status is measured in terms of five dimensions (mobility, self-care, usual activities, pain/discomfort, and anxiety/depression) on a five-point scale (no problems, slight problems, moderate problems, severe problems and extreme problems). In the health evaluation part, the EQ Visual Analogue Scale (EQ VAS) records the respondent's health on a vertical VAS where the end points are labelled 'best imaginable health state' and 'worst imaginable health state'.

### *Pain Self-Efficacy Questionnaire (PSEQ-2)*

The PSEQ-2 is a 2-item questionnaire that measures pain self-efficacy, which is the belief held by people with chronic pain that they can carry out certain activities and enjoy life, despite experiencing pain.(20,21) The items of the questionnaire are rated on a numeric rating scale from 0 to 6.

### *Pain Catastrophizing Scale – 6 (PCS-6)*

The PCS-6 is a 6-item questionnaire that investigates catastrophizing thinking in a range from 0 to 4.(22,23) Pain catastrophizing denotes a negative cognitive-affective response to pain and is associated to increased pain severity, disability and depressive symptoms and is associated with poor adjustment to chronic pain.(24)

### *Patient Health Questionnaire-2 (PHQ-2)*

The PHQ-2 is a screening instrument consisting of two items assessing the presence of a depressed mood and a loss of interest or pleasure in routine activities.(25,26) The items of the questionnaire are rated on a numerical scale from 0 to 3.

### *Patients' Global Impression of Change (PGIC)*

The PGIC is a single question used to identify clinically significant change by rating the patient's belief about the efficacy of treatment on a 7-point scale, ranging from 'no change (or condition has got worse)' to 'a great deal better'.(27)

## Additional measurements

Participants are asked to supply details regarding background information such as age, gender, height, weight, type and use of the prosthesis, level of embodiment of the prosthesis, onset of PLP, details about previous and ongoing intervention for PLP and side, level and date of amputation. Additionally, we also survey: patients' expectancy of benefit using the Expectations for Complementary and Alternative Medicine Treatments (EXPECT-SF);(28) patients' judgment about the credibility of the treatment using the Opinion About Treatment (OAT)(29) and patients' perception of therapists' supportive behaviour using the short form of the 6-item Health Care Climate Questionnaire (HCCQ).(30)

## Sample size

The calculation of the sample size was based on our primary hypothesis and informed by our previous clinical trial with no control group.(6) In order to find a mean difference of 4 between the two randomised groups in the primary outcome measure (PRI), with power of 80% resulting from a two-sided Fisher's non-parametric permutation test at 5% significance level, is estimated that at least 60 participants are required. As a drop-out rate of 10% is expected, a total of 67 patients will be randomised.

## Methods: Assignment of intervention

### Randomization

Participants are assigned to the experimental or control group according to the optimal allocation scheme of minimization, aimed at reducing the imbalance between the number of patients allocated to each treatment group. The randomization proportion is 2:1, with twice as many subjects assigned to the experimental treatment. The allocation ratio was chosen to collect more information on important variables regarding the intervention of interest. The allocation aims to minimize the imbalance of the following factors:

- Level of amputation (upper and lower)
- Baseline PLP based on the NRS (low 1 to 4, and high 5 to 10)
- Investigation site (9 centres)

The minimisation process is conducted using the open source desktop application MinimPy,(31) operated by the monitor of the clinical trial. Every time a research team at a particular investigational site recruits a new participant, they assess the person's eligibility for the study (Visit 0). Afterwards, if the participant is deemed eligible, the research team sends the minimization factors relative to the enrolled participant to the monitor, who runs the randomisation, and informs the research team of the allocation.

## Blinding

This investigation has been designed in such a way that participants of the two treatment groups use the same device under the same circumstances.

Even though the patients are necessarily aware of the treatment they are receiving, they do not have an expectation of superiority of the experimental over the control treatment (or vice versa), since the trial is framed as a comparison between two different interventions previously described in the literature. It is worth noting that the distinction between motor execution and motor imagery is often imperceptible, even for professionals in the field, who have often described voluntary movements of the missing limb as imaginary movements.<sup>(9,32–37)</sup> We take this fact as a corroborant of our assumption that there are no differences at baseline with respect to expectations and opinions about the assigned treatment among participants. Nevertheless, individuals' expectations regarding outcomes and credibility of the assigned treatment are assessed with the EXPECT-SF and the OAT questionnaires respectively.

The nature of the investigation does not allow the masking of the treatment for the therapists. However, it is still important to check for possible differences between the two groups concerning the therapists' supportive behaviour. For this reason, the HCCQ, is included as a measure of the extent to which a health care provider (or the staff) interacts with their patient in a supportive manner.

The outcome assessments are conducted by independent persons who are blinded to the group allocation, making the trial double blind. In order to keep group allocation confidential, participants are requested prior to each assessment not to reveal allocation or therapy content to the evaluators.

The raw data resulting from the outcome assessment has the same structure for both interventions, making it impossible to tell the group assignment without being in possession of the documents containing links between participant's identity and their code number.

## Methods: Data collection, management and analysis

### Data collection and management

The monitor of the study (EL) is in charge of overseeing the progress of the RCT and ensuring that it is conducted, recorded, and reported in accordance with the protocol, Good Clinical Practice (GCP), and regulatory requirements.

The monitor supplies Case Report Forms (CRFs), which are filled in by the evaluator at each site. The evaluator is responsible to document all data obtained during the study which is identified by participant code number. This also applies to data for patients who, after having consented to participate, undergo the baseline examinations required for inclusion in the study, but who are not included. No items in the CRF are to be left unattended: if data are missing or are impossible to obtain, these should be documented as "not available" (NA) and the reasons for missing data must be noted in the document.

All data are recorded and stored in digital form on encrypted electronic devices. Documents containing links between a participant's identity and their code number exist only in paper form and are kept in locked file cabinets with limited access at the investigation site where the participants have been

1  
2  
3 treated. In accordance with the regulations issued by The Swedish Data Protection Authority, a personal  
4 register will be established.  
5

6 The clinical investigators are responsible to probe, via discussion with the participant, for the occurrence  
7 of adverse events during each visit and record the information in the patient CRF. Adverse events must  
8 be described by duration (start and stop dates and times), severity, outcome, treatment and relation to  
9 study device, or if unrelated, the cause. The investigator must report any reportable event to the  
10 monitor in acceptable timely conditions, but not later than three working days after the occurrence of  
11 the event.  
12  
13

14 Table 2: Summary of the different items (intervention, forms and questionnaires) to be completed at  
15 each evaluation appointment. Questionnaire for Phantom Limb Pain (Q-PLP), Pain Disability Index (PDI),  
16 2-item Pain Self-Efficacy Questionnaire (PSEQ-2), Euroqol-5D-5L (EQ-5D-5L), Pain Catastrophizing Scale  
17 Short Form (PCS-SF), 2-item Patient Health Questionnaire (PHQ-2), Patients' Global Impression of  
18 Change (PGIC), Opinion About Treatment (OAT), Health Care Climate Questionnaire (HCCQ) and  
19 Expectations for Complementary and Alternative Medicine Treatments Short Form (EXPECT-SF). In  
20 brackets the indication of whether the therapist (T) or the evaluator (E) is responsible of conducting a  
21 particular item is  
22  
23

| Session              | Summary of content                                                                                                                                                                                                                                                                                                                    |
|----------------------|---------------------------------------------------------------------------------------------------------------------------------------------------------------------------------------------------------------------------------------------------------------------------------------------------------------------------------------|
| Visit 0              | <ul style="list-style-type: none"> <li>• Patient Information (T)</li> <li>• Study Consent (T)</li> <li>• Pre-Assessment (T)</li> <li>• Background Information (T)</li> <li>• Q-PLP (T)</li> <li>• PDI (T)</li> <li>• EQ5D-5L (T)</li> <li>• PSEQ-2 (T)</li> <li>• PCS-SF (T)</li> <li>• PHQ-2 (T)</li> <li>• EXPECT-SF (T)</li> </ul> |
| <b>Randomization</b> |                                                                                                                                                                                                                                                                                                                                       |
| Visit 1              | <ul style="list-style-type: none"> <li>• Treatment session (T)</li> <li>• Q-PLP (E)</li> <li>• OAT (E)</li> <li>• EXPECT-SF (E)</li> <li>• HCCQ-SF (E)</li> </ul>                                                                                                                                                                     |
| Visit 2-14           | <ul style="list-style-type: none"> <li>• Treatment session (T)</li> <li>• Q-PLP (E)</li> </ul>                                                                                                                                                                                                                                        |
| Visit 15             | <ul style="list-style-type: none"> <li>• Treatment session (T)</li> <li>• Q-PLP (E)</li> <li>• PDI (E)</li> <li>• EQ5D-5L (E)</li> <li>• PSEQ-2 (E)</li> <li>• PCS-SF (E)</li> <li>• PHQ-2 (E)</li> <li>• PGIC (E)</li> </ul>                                                                                                         |

|                   |                                                                                       |
|-------------------|---------------------------------------------------------------------------------------|
|                   | <ul style="list-style-type: none"> <li>• HCCQ-SF (E)</li> </ul>                       |
| 1-month follow-up | <ul style="list-style-type: none"> <li>• Q-PLP (E)</li> <li>• PDI (E)</li> </ul>      |
| 3-month follow-up | <ul style="list-style-type: none"> <li>• EQ5D-5L (E)</li> <li>• PSEQ-2 (E)</li> </ul> |
| 6-month follow-up | <ul style="list-style-type: none"> <li>• PCS-SF (E)</li> <li>• PHQ-2 (E)</li> </ul>   |

The sponsor must report to the Medical Products Agency (Läkemedelsverket) any serious adverse event which indicates an imminent risk of death, serious injury, or serious illness and that requires prompt remedial action for other patients, users or other persons immediately, but not later than two working days after becoming aware of a new reportable event or of new information in relation to an already reported event.

Once all the data are collected, checked, and corrected, the database is closed and analyses performed. All data transfer, processing and analyses are done using depersonalised data and all the data sets are protected by password. In order to promote data quality, the evaluators are trained on all the data collection and management procedures and are provided with written instructions by the first (EL) and last (MO-C) authors.

To incentivise the completion of the follow-up, the patients are given the choice to participate in these assessments at the clinic or via a phone interview with the evaluators. When possible, follow-up assessments are also conducted with participants that had discontinued the treatment or withdrew from the study.

### Statistical methods

The main analysis will be performed in terms of change from baseline to the measurement at treatment completion using the ITT population. Complementary analyses will be performed on the Per Protocol (PP) population with respect to the change from baseline to the follow up assessments at 1,3 and 6 months after completion. These complementary analyses will include also the data coming from patients that after appropriate washout period to exclude carry-over, have crossed over to the alternative treatment. Both the ITT population and the PP population will be specified in detail at the Clean file meeting before the database lock and before breaking the code. The PP population will be restricted to the participants who successfully complete all 15 treatment sessions.

Suitable graphical and numerical summaries will be provided for all the variables measured and for corresponding changes in scores.

For the main unadjusted comparison between two groups, Fisher's non-parametric permutation test will be used for continuous variables, Mantel-Haenszel chi-square test for ordered categorical variables, Fisher's exact test for dichotomous variables and Pearson's chi-square test for non-ordered categorical variables. Confidence intervals at 95% for the mean differences between two groups will be given when appropriate. If differences exist between the two randomised groups between baseline variables that could influence the outcome variables, a complementary adjusted analysis will be performed for these baseline variables.



1  
2  
3 For adjusted comparison between two groups, analysis of covariance (ANCOVA) will be used for  
4 continuous outcome variables not obviously non-normally distributed with intervention/control as  
5 independent variable and all confounders as covariates.  
6

7 For analysis of change within groups, Wilcoxon Signed rank test will be used for continuous variables  
8 and Sign test for ordered categorical and dichotomous variables. A complementary mixed model  
9 analysis between the two treatments regarding the primary efficacy variable with centre as random  
10 effect will be used to correct for the centre-effect in the statistical models.  
11  
12

13 All correlations will be performed with Spearman's correlation coefficient. The distribution of  
14 continuous variables will be given as mean, standard deviation, median, minimum and maximum, and  
15 distribution of categorical variables will be given as numbers and percentages. All statistical tests will be  
16 two-sided and conducted at the 5% significance level. The theory of sequential multiple test procedures  
17 will be applied for the primary analysis and for secondary analyses. If a test gives a significant result at  
18 the 5% significance level, the total test mass will be transferred to the following number in the test  
19 sequence until a non-significant result is achieved. All these significant tests will be considered  
20 confirmative. A Statistical Analysis Plan (SAP) will be written with all detailed statistical analyses  
21 specified.  
22  
23

## 24 Patient and Public Involvement

25 The design of the study was informed by the experience with our previous clinical investigation, (6)  
26 thanks to which patients' priorities, experience, and preferences were identified and used for the  
27 development of the research question and outcome measures of the current RCT. The burden of the  
28 control intervention was assessed with a pilot study on volunteers with past experience with the  
29 experimental intervention.  
30  
31

## 32 Ethics and dissemination

### 33 Research ethics approval

34 There are no known risks associated with the experimental or control treatments and clinically  
35 significant deterioration is rare. Possible individual benefits include reduced phantom limb pain, reduced  
36 disability associated with pain, and improvement in various aspects related to quality of life. This trial  
37 has been approved by the governing ethical committees of each participating country. Important  
38 protocol modifications will be reported in a timely manner to all the relevant parties.  
39  
40  
41

### 42 Access to data

43 The principal investigator, MO-C, has full access to all of the data in the study except the documents  
44 containing the link between patient's identity and their code number, which will be accessible only after  
45 the completion of the data analyses. MO-C takes responsibility for the integrity of the data and the  
46 accuracy of the data analysis.  
47  
48

### 49 Dissemination Policy

50 Regardless of the significance, direction, or magnitude of effect, the consortium will publish the findings  
51 of this study in scientific, peer-reviewed journals and conferences following the CONSORT guidelines. All  
52 the clinical investigators will author the scientific article reporting the results of the trial. Results will be  
53 also disseminated to all the participants of the study with a report. No professional writers external to  
54 the study will be used aside from conventional English proof reading. Access to the detailed clinical  
55  
56  
57  
58

1  
2  
3 investigation plan, participant-level dataset, and statistical code will be granted based on reasonable  
4 requests after the publication of the study.  
5

## 6 7 Trial status

8 This clinical trial is currently in the participant enrolment phase. Fourteen patients have been  
9 randomized and are under treatment at November 2017. It is anticipated that full analysis will be  
10 finalised in April 2020.  
11

## 12 13 References

- 14 1. Dijkstra PU, Geertzen JHB, Stewart R, van der Schans CP. Phantom pain and risk factors: a  
15 multivariate analysis. *J Pain Symptom Manag* [Internet]. 2002 Dec;24(6):578–85.  
16 Available from: <http://www.ncbi.nlm.nih.gov/pubmed/12551807>
- 17 2. Clark RL, Bowling FL, Jepson F, Rajbhandari S. Phantom limb pain after amputation in  
18 diabetic patients does not differ from that after amputation in nondiabetic patients.  
19 *Pain*. 2013 May;154(5):729–32.  
20
- 21 3. Nikolajsen L, Jensen TS. Phantom limb pain. *Br J Anaesth*. 2001 Jul;87(1):107–16.
- 22 4. Batsford S, Ryan CG, Martin DJ. Non-pharmacological conservative therapy for phantom  
23 limb pain: A systematic review of randomized controlled trials. *Physiother Theory Pract*  
24 [Internet]. 2017;33(3):173–83. Available from:  
25 <http://dx.doi.org/10.1080/09593985.2017.1288283>
- 26 5. Ortiz-Catalan M, Sander N, Kristoffersen MB, Håkansson B, Brånemark R. Treatment of  
27 phantom limb pain (PLP) based on augmented reality and gaming controlled by  
28 myoelectric pattern recognition: A case study of a chronic PLP patient. *Front Neurosci*.  
29 2014;  
30
- 31 6. Ortiz-Catalan M, Guðmundsdóttir RA, Kristoffersen MB, Zepeda-Echavarria A, Caine-  
32 Winterberger K, Kulbacka-Ortiz K, et al. Phantom motor execution facilitated by machine  
33 learning and augmented reality as treatment for Phantom Limb Pain. *Lancet*.  
34 2016;388(10062):2885–94.  
35
- 36 7. Raffin E, Richard N, Giroux P, Reilly KT. Primary motor cortex changes after amputation  
37 correlate with phantom limb pain and the ability to move the phantom limb.  
38 *Neuroimage*. 2016;130:134–44.  
39
- 40 8. Lendaro E, Mastinu E, Håkansson B, Ortiz-Catalan M. Real-time classification of non-  
41 weight bearing lower limb movements using EMG to facilitate phantom motor execution:  
42 engineering and case study application on phantom limb pain. *Front Neurol*.  
43 2017;8(September):1–12.  
44
- 45 9. MacIver K, Lloyd DM, Kelly S, Roberts N, Nurmikko T. Phantom limb pain, cortical  
46 reorganization and the therapeutic effect of mental imagery. *Brain* [Internet]. 2008 Aug  
47 [cited 2016 Jun 10];131(Pt 8):2181–91. Available from:  
48 <http://www.ncbi.nlm.nih.gov/pubmed/18567624>
- 49 10. Chan BL, Witt R, Charrow AP, Magee A, Howard R, Pasquina PF, et al. Mirror therapy for  
50 phantom limb pain. *N Engl J Med*. 2007;357(21):2206–7.  
51
- 52 11. Moseley GL. Graded motor imagery for pathologic pain: A randomized controlled trial.  
53 *Neurology*. 2006;67(12):2129–34.  
54  
55  
56  
57  
58

12. Bowering KJ, Connell NEO, Tabor A, Catley MJ, Leake HB, Moseley GL, et al. The Effects of Graded Motor Imagery and Its Components on Chronic Pain: A Systematic Review and Meta-Analysis. *J Pain* [Internet]. 2013;14(1):3–13. Available from: <http://dx.doi.org/10.1016/j.jpain.2012.09.007>
13. Ortiz-Catalan M, Brånemark R, Håkansson B. BioPatRec: A modular research platform for the control of artificial limbs based on pattern recognition algorithms. *Source Code Biol Med* [Internet]. 2013;8(1):11. Available from: <http://www.pubmedcentral.nih.gov/articlerender.fcgi?artid=3669028&tool=pmcentrez&rendertype=abstract>
14. Ortiz-Catalan M, Håkansson B, Brånemark R. Real-time and simultaneous control of artificial limbs based on pattern recognition algorithms. 2014;22(4):756–64.
15. Simon AM, Hargrove LJ, Lock BA, Kuiken TA. Target Achievement Control Test: evaluating real-time myoelectric pattern-recognition control of multifunctional upper-limb prostheses. *J Rehabil Res Dev* [Internet]. 2011;48(6):619–27. Available from: <http://www.pubmedcentral.nih.gov/articlerender.fcgi?artid=4232230&tool=pmcentrez&rendertype=abstract>
16. Melzack R. The short-form McGill pain questionnaire. *Pain*. 1987;30(2):191–7.
17. Pollard CA. Preliminary validity study of the pain disability index. *Percept Mot Skills* [Internet]. 1984 Dec [cited 2017 Jan 9];59(3):974. Available from: <http://www.ncbi.nlm.nih.gov/pubmed/6240632>
18. Melzack R. The McGill Pain Questionnaire: Major properties and scoring methods. *Pain*. 1975;1(3):277–99.
19. Herdman M, Gudex C, Lloyd A, Janssen M, Kind P, Parkin D, et al. Development and preliminary testing of the new five-level version of EQ-5D (EQ-5D-5L). *Qual Life Res*. 2011;20(10):1727–36.
20. Nicholas MK. The pain self-efficacy questionnaire: Taking pain into account. *Eur J Pain*. 2007;11(2):153–63.
21. Nicholas MK, McGuire BE, Asghari A, Adams JH, Williams Ac, Asghari A, et al. A 2-item short form of the Pain Self-efficacy Questionnaire: development and psychometric evaluation of PSEQ-2. *J Pain* [Internet]. 2015 Feb [cited 2017 Jan 8];16(2):153–63. Available from: <http://www.ncbi.nlm.nih.gov/pubmed/25463701>
22. McWilliams LAA, Kowal J, Wilson KGG. Development and evaluation of short forms of the Pain Catastrophizing Scale and the Pain Self-efficacy Questionnaire. *Eur J Pain (United Kingdom)* [Internet]. 2015 Oct [cited 2017 Jan 9];19(9):1342–9. Available from: <http://doi.wiley.com/10.1002/ejp.665>
23. Sullivan MJL, Bishop SR, Pivik J. The Pain Catastrophizing Scale: Development and validation. *Psychol Assess* [Internet]. 1995 [cited 2017 Jan 9];7(4):524–32. Available from: <http://doi.apa.org/getdoi.cfm?doi=10.1037/1040-3590.7.4.524>
24. Sullivan MJ, Thorn B, Haythornthwaite JA, Keefe F, Martin M, Bradley LA, et al. Theoretical perspectives on the relation between catastrophizing and pain. *Clin J Pain* [Internet]. 2001;17(1):52–64. Available from: <http://eutils.ncbi.nlm.nih.gov/entrez/eutils/elink.fcgi?dbfrom=pubmed&id=11289089&retmode=ref&cmd=prlinks%5Cnpapers3://publication/uuid/1BA1859E-0DF6-4699-BEB8-3B7333A863F2%5Cnpapers3://publication/uuid/746F3ABA-CEFF-4BB5-B039->

- 17620AE59164%5Cnhttp://eutil
25. Spitzer RL, Kroenke K, Williams JBW. Validation and Utility of a Self-report Version of PRIME-MD. *J Am Med Assoc* [Internet]. 1999;282(18):1737–44. Available from: <http://jama.ama-assn.org/content/282/18/1737.abstract>
  26. Kroenke K, Spitzer RL, Williams JBW. The Patient Health Questionnaire-2 Validity of a two-item depression screener. *Med Care*. 2003;41(11):1284–92.
  27. Hurst H, Bolton J. Assessing the clinical significance of change scores recorded on subjective outcome measures. *J Manipulative Physiol Ther*. 2004;27(1):26–35.
  28. Jones SM, Lange J, Turner J, Cherkin D, Ritenbaugh C, Hsu C, et al. Development and Validation of the EXPECT Questionnaire : Assessing Patient Expectations of Outcomes of Complementary and Alternative Medicine Treatments for Chronic Pain. 2016;0(0):1–11.
  29. Mooney TK, Beth M, Gibbons C, Gallop R, Mack RA, Crits-christoph P. Credibility and the Relation of Credibility to Therapy Outcome. 2015;24(5):565–77.
  30. Williams GC, Freedman ZR, Deci EL. Supporting Autonomy to Motivate Patients With Diabetes for Glucose Control. *Diabetes Care*. 1998;21(10):1644–51.
  31. Saghaei M. Implementation of an open-source customizable minimization program for allocation of patients to parallel groups in clinical trials. *J Biomed Sci Eng*. 2011;4(November):734–9.
  32. Erslund L, Rosén G, Lundervold A, Smievoll a I, Tillung T, Sundberg H, et al. Phantom limb imaginary fingertapping causes primary motor cortex activation: an fMRI study. *Neuroreport*. 1996;8(1):207–10.
  33. Hugdahl K, Rosén G, Erslund L, Lundervold A, Smievoll AI, Barndon R, et al. Common pathways in mental imagery and pain perception: an fMRI study of a subject with an amputated arm. *Scand J Psychol* [Internet]. 2001 Jul [cited 2017 Feb 24];42(3):269–75. Available from: <http://www.ncbi.nlm.nih.gov/pubmed/11501740>
  34. Lotze M, Flor H, Grodd W, Larbig W, Birbaumer N. Phantom movements and pain. An fMRI study in upper limb amputees. *Brain* [Internet]. 2001 Nov [cited 2016 Jun 10];124(Pt 11):2268–77. Available from: <http://www.ncbi.nlm.nih.gov/pubmed/11673327>
  35. Rosén G, Hugdahl K, Erslund L, Lundervold A, Smievoll AI, Barndon R, et al. Different brain areas activated during imagery of painful and non-painful “finger movements” in a subject with an amputated arm. *Neurocase* [Internet]. 2001;7(3):255–60. Available from: <http://www.ncbi.nlm.nih.gov/pubmed/11459920>
  36. Roux FE, Ibarrola D, Lazorthes Y, Berry I. Virtual movements activate primary sensorimotor areas in amputees: report of three cases. *Neurosurgery* [Internet]. 2001 Sep [cited 2017 Feb 24];49(3):736-41-2. Available from: <http://www.ncbi.nlm.nih.gov/pubmed/11523688>
  37. Roux FE, Lotterie JA, Cassol E, Lazorthes Y, Sol JC, Berry I, et al. Cortical Areas Involved in Virtual Movement of Phantom Limbs: Comparison with Normal Subjects. *Neurosurgery*. 2003;53(6):1342–53.

## Figure legends

Figure 1: Flow diagram for the randomized controlled clinical trial. At least sixty-seven patients are recruited and randomly allocated to either Phantom Motor Execution (PME) or Phantom Motor Imagery (PMI) interventions in allocation ratio 2:1. Following the completion of the treatment protocol and

1  
2  
3 wash-out period of six months it is possible for the patient to cross over to the parallel interventional  
4 arm, according to their will.  
5

6 Figure 2: Schematic illustration of the clinical investigation device with all its components. Myoelectric  
7 signals are acquired through surface electrodes (A) by a myoelectric amplifier (B), electrically isolated (C).  
8 The signals are then processed by the software installed on the computer (D). The camera (E) films the  
9 participant and the recorded image is displayed on the monitor (F) with a virtual limb superimposed  
10 where the marker (G) is detected. Figure courtesy of Jason Millenaar.  
11  
12  
13  
14  
15  
16  
17  
18  
19  
20  
21  
22  
23  
24  
25  
26  
27  
28  
29  
30  
31  
32  
33  
34  
35  
36  
37  
38  
39  
40  
41  
42  
43  
44  
45  
46  
47  
48  
49  
50  
51  
52  
53  
54  
55  
56  
57  
58  
59  
60

For peer review only



32  
33  
34  
35  
36  
37  
38  
39  
40  
41  
42  
43  
44  
45  
46  
47  
48  
49  
50  
51  
52  
53  
54  
55  
56  
57  
58  
59  
60

Flow diagram for the randomized controlled clinical trial. At least sixty-seven patients are recruited and randomly allocated to either Phantom Motor Execution (PME) or Phantom Motor Imagery (PMI) interventions in allocation ratio 2:1. Following the completion of the treatment protocol and wash-out period of six months it is possible for the patient to cross over to the parallel interventional arm, according to their will.

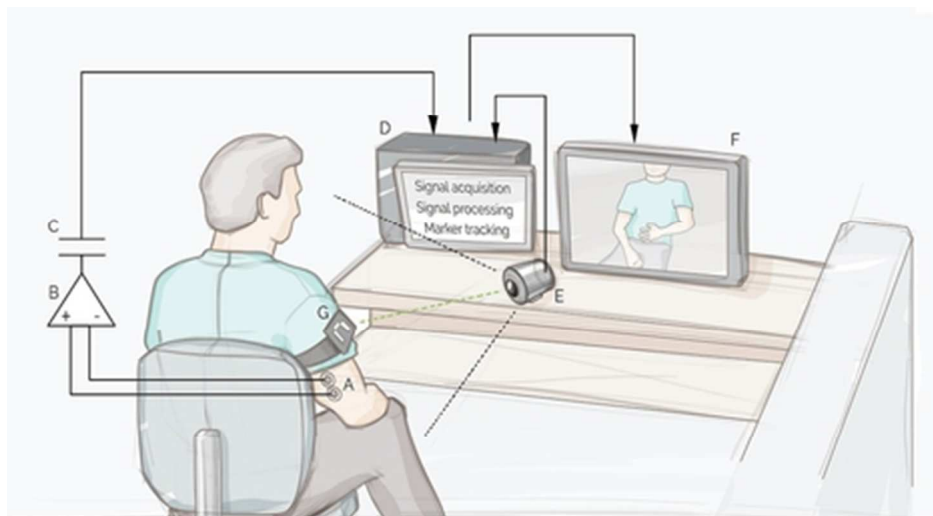

Figure 2: Schematic illustration of the clinical investigation device with all its components. Myoelectric signals are acquired through surface electrodes (A) by a myoelectric amplifier (B), electrically isolated (C). The signals are then processed by the software installed on the computer (D). The camera (E) films the participant and the recorded image is displayed on the monitor (F) with a virtual limb superimposed where the marker (G) is detected. Figure courtesy of Jason Millenaar.

39x22mm (300 x 300 DPI)

## PARTICIPANT INFORMATION SHEET

### 1. Introduction

**Title of Project:** Virtual Reality as a Treatment for Phantom Limb Pain – A Randomised Controlled Trial

### 2 Invitation

You are being invited to take part in a research study investigating the effect of two different forms of virtual motor training as a treatment for phantom pain. Before you decide, it is important for you to understand why the research is being done and what it will involve. This *Participant Information Sheet* will tell you about the purpose, risks and benefits of this research study. If you agree to take part, we will ask you to sign a Consent Form. If there is anything that you are not clear about, we will be happy to explain it to you. Please take as much time as you need to read it. You should only consent to participate in this research study when you feel that you understand what is being asked of you, and you have had enough time to think about your decision. Thank you for reading this.

### 3 Purpose of the Study

Phantom pain occurs in about 70-80% of all amputees and many continue to feel the lost body part which is called phantom arm or phantom leg. Some individuals feel that they can move their phantom arms or legs while others feel that the phantom limb is immobile and very painful. Although there are many different ways to treat phantom limb pain, there is still no satisfactory treatment to help all patients. During the last decade, TENS and mirror therapy have started to be used to treat phantom limb pain. A further development has taken place with the help of modern computer technology which enables the training of the amputated body part in a virtual reality. The method involves performing virtual motor training exercises i.e. patients learn to move an image of their phantom arm or leg and this is believed to stimulate repair mechanisms in the brain. We aim to investigate whether two different variants of this new technology effectively reduce phantom pain in amputees.

### 4 Study Design

The study is a randomized, controlled clinical trial. This means that the you have been randomly assigned to one of two groups that will receive different treatments for phantom limb. Both treatment methods are believed to be effective but we will examine if there is something in one of the two methods more effective than the other. If the current treatment does not give you any improvement, you'll be able to undergo the second form of treatment, if you wish, after completion of the first programme.

### 5 Taking part – what it involves

#### *What will happen to me if I take part?*

In the treatment, adhesive electrodes will be used: these will be attached to the skin on your stump. With these electrodes, signals from the stump muscles can be recorded. When the virtual arm or leg on the screen moves, you should either imagine or perform the same movements with your own phantom arm or leg. Activity in the stump muscles is recorded via the adhesive pads. The training also includes various computer games that are controlled by the system.



1  
2  
3 There are several possible explanatory mechanisms for the analgesic effect that can be achieved  
4 with virtual motor training. It is believed that the areas of the brain required for movements in the  
5 amputated arm are partially reactivated. The patient receives visual feedback that tricks the brain  
6 into thinking that there is an arm that receives the brain's movement commands. After each  
7 treatment, you will be asked to answer questions about how you experience phantom pain. At the  
8 first and last treatment session, you will also answer questions about how you experience your  
9 health overall. Individual interviews will be conducted on a sample of the study participants after  
10 treatment. The objective of the qualitative part is to explore how individuals experienced the  
11 treatment, and if and how this is perceived to have affected their health in general. To investigate  
12 whether the treatment has a lasting effect, you will be called for examination 1, 3 and 6 months  
13 after treatment.  
14  
15

#### 16 17 *Do I have to take part?*

18 It is up to you to decide whether or not to take part. If you do decide to take part you will be given  
19 this information sheet to keep and be asked to sign a consent form, a copy of which you can also  
20 keep. If you decide to take part, you are still free to withdraw at any time and without giving a  
21 reason. A decision to withdraw at any time, or a decision not to take part, will not affect your rights  
22 in any way.  
23  
24

#### 25 26 *How long will my part in the study last?*

27 There will be a total of 15 treatment sessions that last about 2 hours each. You can choose to receive  
28 the treatment one, two or five times a week.  
29

#### 30 31 *What are the possible benefits in taking part?*

32 If the treatment has the effect we expect, your phantom pain is likely to decrease. In the unlikely  
33 event that the treatment does not produce results, you will get the opportunity to try the other  
34 treatment option after the completion of the long-term follow-up.  
35

#### 36 37 *What are the possible disadvantages and risks of taking part?*

38 All elements of the study are done under safe conditions by trained and skilled staff and you will not  
39 be exposed to any risks associated with either treatment or evaluation. If you come into the  
40 treatment group that uses the stump muscles during exercise, you may experience tiredness in your  
41 muscles at the beginning of treatment. This, however, is transient.  
42

#### 43 44 *What happens at the end of the study?*

45 When the long-term follow-up is completed, you will have the opportunity to have a copy of your  
46 own results. On request, you can also get information about the overall results of the study. The  
47 study and its results will be announced by publication in international scientific journals.  
48

#### 49 50 *What happens if I change my mind during the study?*

51 You are entitled to change your mind about participating in this at any time without disadvantage or  
52 penalty. If you decide to withdraw, all your data will be destroyed and will not be used in the study.  
53

## 54 55 6 Confidentiality

56 All information that is collected about you during the course of the research will be kept strictly  
57 confidential and will not be shared with anyone else. The information collected in this research study  
58 will be stored in a way that protects your identity.

59 Information obtained during this study will be compiled with the help of a computer to analyze the  
60 results. The information is treated as confidential and will be stored for 10 years. All data processing

1  
2  
3 will be done with coded identity (individuals cannot be recognized from their data) and the results  
4 will be presented in a way in which no individual can be identified. Your personal information is  
5 securely protected and cannot be accessed by unauthorized persons. The identity code concerning  
6 research participants will be kept securely at the project leader's site.  
7

8  
9 7 Responsible for the investigations  
10

11 **Coordinating Investigator:**

12 Max Ortiz Catalan, Chalmers University of Technology, Institution for Electrical Engineering, 412 96  
13 Gothenburg.

14 E-mail: [maxo@chalmers.se](mailto:maxo@chalmers.se)

15 **Tel: + 46 (0) 708 46 10 65**  
16  
17  
18  
19

20 Thank you for taking the time to read this information sheet.  
21  
22  
23  
24  
25  
26  
27  
28  
29  
30  
31  
32  
33  
34  
35  
36  
37  
38  
39  
40  
41  
42  
43  
44  
45  
46  
47  
48  
49  
50  
51  
52  
53  
54  
55  
56  
57  
58  
59  
60

## Appendix B – Extended Methods

### Interventions

Possible phantom movement for upper limb amputees are hand open and close, pronation and supination, wrist flexion and extension, elbow flexion and extension, flexion and extension of the individual fingers. Possible movements for lower limb amputees are knee extension and flexion, femoral rotation outwards and inwards, ankle plantar flexion and dorsiflexion, tibial rotation outwards and inwards, ankle eversion and inversion, flexion and extension of the toes. Upper and lower limb movements can be performed individually and simultaneously (more than two movements at the same time). Depending on the level of amputation, some movements are omitted from the treatment because they involve the residual rather than the phantom limb: e.g. elbow movements in transradial amputees. According to whether the subjects are assigned to the control or experimental intervention, they are asked to either imagine or execute these phantom movements as naturally and intuitively as possible.

### Experimental Treatment

A Phantom Motor Execution (PME) treatment session consists of the following components:

1. **Placement of electrodes and fiducial marker.** To place the electrode in an appropriate way, subjects are asked to execute different phantom movements while the stump is palpated to localize the muscles. Areas with excess of soft-tissue between muscles and skin are avoided. Four to eight bipolar superficial electrodes (pre-gelled, adhesive, Ag/AgCl, one cm diameter, and two cm inter-electrode distance) are then placed along the muscle fibres where possible, else one electrode is placed on the target muscle while the other is placed on a more electrically neutral area. In the case of transfemoral amputations, electrodes are placed according to the *targeted monopolar configuration* described in detail in reference: (Lendaro et al., 2017).
2. **PME training cycle** (see Figure B1)
  - a. **Recording session.** The subjects are asked to perform three repetitions of the movements as shown by a virtual limb alternated by rest periods. The standard contraction time is set to three seconds followed by three seconds of relaxation. However, this time might be increased in case longer time is required to complete the phantom movement. This step is necessary to collect myoelectric data used to train the motor volition decoding algorithms. The movements performed are dictated by the current level of difficulty (see “Levels of difficulty”).
  - b. **Phantom motor execution in augmented reality (AR).** The subjects are then asked to control the virtual limb by performing the movements previously trained.
  - c. **Serious gaming.** Each phantom movement trained during the recording session is then paired to activate a specific key on the computer keyboard. Computer games that would normally be controlled by those keys can then be controlled by the phantom movements, enabling the control of the game through *phantom motor execution*.
  - d. **Target achievement control (TAC) test.** In this part of the training cycle the subjects are asked to move a virtual limb aiming to match a target posture determined by the movements previously trained. The target posture is considered achieved when the subject is able to position the virtual limb within  $\pm 5$  degrees range in less than 20 seconds, and hold it for a two-second dwell interval. The trained movements are randomly requested six times each. This test was originally designed to evaluate control strategies for multi-functional prosthetic devices represented in virtual reality (Simon et al., 2011) In this study, the TAC test is used only for rehabilitation purposes and it is used as implemented in our open source platform named BioPatRec (Ortiz-Catalan et al., 2013).

3. **Outcomes evaluation.** Depending on the specific visit different outcome measures are recorded by blind evaluators at the end of the treatment, as reported in Table 2.



Figure B1: Training cycle for the Phantom Motor Execution (PME) intervention (left) and Phantom Motor Imagery (PMI) intervention (right)

### Control Treatment

A Phantom Motor Imagery (PMI) treatment session consists of the same components as the experimental intervention, however there are some differences in the treatment cycle (see Figure B1), which are listed below:

- **Calibration.** The training cycle starts with the calibration. During this step, the patient is asked to relax the muscles completely and stay still. This phase is required in order to set the relaxation or “non-activity” level and enable the detection of contractions associated with unwanted motor execution.
- **Movement presentation.** This step is the analogue of the recording session in the experimental treatment and is meant to present a sequence of selected movements to the subject. The movements are chosen based on an increasing level of difficulty (see “Levels of difficulty”). Every movement is presented three times, for a period of three seconds in each repetition, and alternated by rest periods of equal length. During this phase the subject is asked to practice the imagination of the movements.
- **Serious gaming.** In the gaming step, the subjects will control the game using the keyboard with an able limb. No imagination is required for this step. However, the patient is expected to engage in an entertaining activity and divert cognitive resources that would be otherwise devoted to pain processing. Bilateral upper limb amputees will use a joystick with any able limb.
- **Phantom motor execution in augmented reality (AR) and TAC test.** The subjects are asked to imagine being in control of the movements autonomously performed by the virtual limb in both AR and VR environments.

### Levels of difficulty

Interventions can be performed at five levels of difficulty. Subjects start at the easiest level and advance to the next level following different modalities depending on their intervention group. Subjects assigned to the PME group move to the next level when they achieve 85%-100% completion rate in the TAC test. If subjects are unable to achieve over 30% of completion rate in the new level, they are advised to move back to the previous level. On the other hand, subjects assigned to the PMI group are instructed on the specific amount of time to spend in each level, which increases with the number of degrees of freedom (DoF) exercised within the same treatment cycle.

- Level 1: Individual movements (1 DoF).

- Level 2: Individual movements (2 DoF). In the second level more than two movements are requested within the same training cycle while keeping each movement independent.
- Level 3: Simultaneous movements (2 DoF). Subjects are required to combine more than one DoF, i.e. pronation while opening or closing the hand, or supination while opening or closing the hand.
- Level 4: Individual movements (3 DoF).
- Level 5: Simultaneous movements (3 DoF).

For peer review only



SPIRIT 2013 Checklist: Recommended items to address in a clinical trial protocol and related documents\*

| Section/item                      | ItemNo | Description                                                                                                                                                                                                                                                                              | Page  |
|-----------------------------------|--------|------------------------------------------------------------------------------------------------------------------------------------------------------------------------------------------------------------------------------------------------------------------------------------------|-------|
| <b>Administrative information</b> |        |                                                                                                                                                                                                                                                                                          |       |
| Title                             | 1      | Descriptive title identifying the study design, population, interventions, and, if applicable, trial acronym                                                                                                                                                                             | 1     |
| Trial registration                | 2a     | Trial identifier and registry name. If not yet registered, name of intended registry                                                                                                                                                                                                     | 2     |
|                                   | 2b     | All items from the World Health Organization Trial Registration Data Set                                                                                                                                                                                                                 | 3-5   |
| Protocol version                  | 3      | Date and version identifier                                                                                                                                                                                                                                                              | 5     |
| Funding                           | 4      | Sources and types of financial, material, and other support                                                                                                                                                                                                                              | 5     |
| Roles and responsibilities        | 5a     | Names, affiliations, and roles of protocol contributors                                                                                                                                                                                                                                  | 5     |
|                                   | 5b     | Name and contact information for the trial sponsor                                                                                                                                                                                                                                       | 5     |
|                                   | 5c     | Role of study sponsor and funders, if any, in study design; collection, management, analysis, and interpretation of data; writing of the report; and the decision to submit the report for publication, including whether they will have ultimate authority over any of these activities | 5     |
|                                   | 5d     | Composition, roles, and responsibilities of the coordinating centre, steering committee, endpoint adjudication committee, data management team, and other individuals or groups overseeing the trial, if applicable (see Item 21a for data monitoring committee)                         | 5, 17 |
| <b>Introduction</b>               |        |                                                                                                                                                                                                                                                                                          |       |
| Background and rationale          | 6a     | Description of research question and justification for undertaking the trial, including summary of relevant studies (published and unpublished) examining benefits and harms for each intervention                                                                                       | 6,7   |
|                                   | 6b     | Explanation for choice of comparators                                                                                                                                                                                                                                                    | 7     |

|                                                           |     |                                                                                                                                                                                                                                                                                                                                                                                |                 |
|-----------------------------------------------------------|-----|--------------------------------------------------------------------------------------------------------------------------------------------------------------------------------------------------------------------------------------------------------------------------------------------------------------------------------------------------------------------------------|-----------------|
| Objectives                                                | 7   | Specific objectives or hypotheses                                                                                                                                                                                                                                                                                                                                              | 7               |
| Trial design                                              | 8   | Description of trial design including type of trial (eg, parallel group, crossover, factorial, single group), allocation ratio, and framework (eg, superiority, equivalence, noninferiority, exploratory)                                                                                                                                                                      | 8               |
| <b>Methods: Participants, interventions, and outcomes</b> |     |                                                                                                                                                                                                                                                                                                                                                                                |                 |
| Study setting                                             | 9   | Description of study settings (eg, community clinic, academic hospital) and list of countries where data will be collected. Reference to where list of study sites can be obtained                                                                                                                                                                                             | 8               |
| Eligibility criteria                                      | 10  | Inclusion and exclusion criteria for participants. If applicable, eligibility criteria for study centres and individuals who will perform the interventions (eg, surgeons, psychotherapists)                                                                                                                                                                                   | 8,9             |
| Interventions                                             | 11a | Interventions for each group with sufficient detail to allow replication, including how and when they will be administered                                                                                                                                                                                                                                                     | 8-9, Appendix B |
|                                                           | 11b | Criteria for discontinuing or modifying allocated interventions for a given trial participant (eg, drug dose change in response to harms, participant request, or improving/worsening disease)                                                                                                                                                                                 | 12              |
|                                                           | 11c | Strategies to improve adherence to intervention protocols, and any procedures for monitoring adherence (eg, drug tablet return, laboratory tests)                                                                                                                                                                                                                              | 8               |
|                                                           | 11d | Relevant concomitant care and interventions that are permitted or prohibited during the trial                                                                                                                                                                                                                                                                                  | 9               |
| Outcomes                                                  | 12  | Primary, secondary, and other outcomes, including the specific measurement variable (eg, systolic blood pressure), analysis metric (eg, change from baseline, final value, time to event), method of aggregation (eg, median, proportion), and time point for each outcome. Explanation of the clinical relevance of chosen efficacy and harm outcomes is strongly recommended | 12-14           |
| Participant timeline                                      | 13  | Time schedule of enrolment, interventions (including any run-ins and washouts), assessments, and visits for participants. A schematic diagram is highly recommended (see Figure)                                                                                                                                                                                               | 10,16           |

|                                                                     |     |                                                                                                                                                                                                                                                                                                                                                                                                              |    |
|---------------------------------------------------------------------|-----|--------------------------------------------------------------------------------------------------------------------------------------------------------------------------------------------------------------------------------------------------------------------------------------------------------------------------------------------------------------------------------------------------------------|----|
| Sample size                                                         | 14  | Estimated number of participants needed to achieve study objectives and how it was determined, including clinical and statistical assumptions supporting any sample size calculations                                                                                                                                                                                                                        | 14 |
| Recruitment                                                         | 15  | Strategies for achieving adequate participant enrolment to reach target sample size                                                                                                                                                                                                                                                                                                                          | 8  |
| <b>Methods: Assignment of interventions (for controlled trials)</b> |     |                                                                                                                                                                                                                                                                                                                                                                                                              |    |
| Allocation:                                                         |     |                                                                                                                                                                                                                                                                                                                                                                                                              |    |
| Sequence generation                                                 | 16a | Method of generating the allocation sequence (eg, computer-generated random numbers), and list of any factors for stratification. To reduce predictability of a random sequence, details of any planned restriction (eg, blocking) should be provided in a separate document that is unavailable to those who enrol participants or assign interventions                                                     | 14 |
| Allocation concealment mechanism                                    | 16b | Mechanism of implementing the allocation sequence (eg, central telephone; sequentially numbered, opaque, sealed envelopes), describing any steps to conceal the sequence until interventions are assigned                                                                                                                                                                                                    | 14 |
| Implementation                                                      | 16c | Who will generate the allocation sequence, who will enrol participants, and who will assign participants to interventions                                                                                                                                                                                                                                                                                    | 14 |
| Blinding (masking)                                                  | 17a | Who will be blinded after assignment to interventions (eg, trial participants, care providers, outcome assessors, data analysts), and how                                                                                                                                                                                                                                                                    | 15 |
|                                                                     | 17b | If blinded, circumstances under which unblinding is permissible, and procedure for revealing a participant's allocated intervention during the trial                                                                                                                                                                                                                                                         | 17 |
| <b>Methods: Data collection, management, and analysis</b>           |     |                                                                                                                                                                                                                                                                                                                                                                                                              |    |
| Data collection methods                                             | 18a | Plans for assessment and collection of outcome, baseline, and other trial data, including any related processes to promote data quality (eg, duplicate measurements, training of assessors) and a description of study instruments (eg, questionnaires, laboratory tests) along with their reliability and validity, if known. Reference to where data collection forms can be found, if not in the protocol | 17 |



|                                 |     |                                                                                                                                                                                                                                                                                                                                       |           |
|---------------------------------|-----|---------------------------------------------------------------------------------------------------------------------------------------------------------------------------------------------------------------------------------------------------------------------------------------------------------------------------------------|-----------|
|                                 | 18b | Plans to promote participant retention and complete follow-up, including list of any outcome data to be collected for participants who discontinue or deviate from intervention protocols                                                                                                                                             | 13        |
| Data management                 | 19  | Plans for data entry, coding, security, and storage, including any related processes to promote data quality (eg, double data entry; range checks for data values). Reference to where details of data management procedures can be found, if not in the protocol                                                                     | 17        |
| Statistical methods             | 20a | Statistical methods for analysing primary and secondary outcomes. Reference to where other details of the statistical analysis plan can be found, if not in the protocol                                                                                                                                                              | 17,18     |
|                                 | 20b | Methods for any additional analyses (eg, subgroup and adjusted analyses)                                                                                                                                                                                                                                                              | 17,18     |
|                                 | 20c | Definition of analysis population relating to protocol non-adherence (eg, as randomised analysis), and any statistical methods to handle missing data (eg, multiple imputation)                                                                                                                                                       | 12, 17,18 |
| <b>Methods: Monitoring</b>      |     |                                                                                                                                                                                                                                                                                                                                       |           |
| Data monitoring                 | 21a | Composition of data monitoring committee (DMC); summary of its role and reporting structure; statement of whether it is independent from the sponsor and competing interests; and reference to where further details about its charter can be found, if not in the protocol. Alternatively, an explanation of why a DMC is not needed | NA        |
|                                 | 21b | Description of any interim analyses and stopping guidelines, including who will have access to these interim results and make the final decision to terminate the trial                                                                                                                                                               | NA        |
| Harms                           | 22  | Plans for collecting, assessing, reporting, and managing solicited and spontaneously reported adverse events and other unintended effects of trial interventions or trial conduct                                                                                                                                                     | 17        |
| Auditing                        | 23  | Frequency and procedures for auditing trial conduct, if any, and whether the process will be independent from investigators and the sponsor                                                                                                                                                                                           | 17        |
| <b>Ethics and dissemination</b> |     |                                                                                                                                                                                                                                                                                                                                       |           |

|                                              |                               |     |                                                                                                                                                                                                                                                                                     |            |
|----------------------------------------------|-------------------------------|-----|-------------------------------------------------------------------------------------------------------------------------------------------------------------------------------------------------------------------------------------------------------------------------------------|------------|
| 1<br>2<br>3<br>4<br>5                        | Research ethics approval      | 24  | Plans for seeking research ethics committee/institutional review board (REC/IRB) approval                                                                                                                                                                                           | 18         |
| 6<br>7<br>8<br>9<br>10<br>11                 | Protocol amendments           | 25  | Plans for communicating important protocol modifications (eg, changes to eligibility criteria, outcomes, analyses) to relevant parties (eg, investigators, REC/IRBs, trial participants, trial registries, journals, regulators)                                                    | 18         |
| 12<br>13<br>14<br>15                         | Consent or assent             | 26a | Who will obtain informed consent or assent from potential trial participants or authorised surrogates, and how (see Item 32)                                                                                                                                                        | 8          |
| 16<br>17<br>18<br>19<br>20                   |                               | 26b | Additional consent provisions for collection and use of participant data and biological specimens in ancillary studies, if applicable                                                                                                                                               | NA         |
| 21<br>22<br>23<br>24<br>25                   | Confidentiality               | 27  | How personal information about potential and enrolled participants will be collected, shared, and maintained in order to protect confidentiality before, during, and after the trial                                                                                                | 17         |
| 26<br>27<br>28                               | Declaration of interests      | 28  | Financial and other competing interests for principal investigators for the overall trial and each study site                                                                                                                                                                       | 6          |
| 29<br>30<br>31<br>32                         | Access to data                | 29  | Statement of who will have access to the final trial dataset, and disclosure of contractual agreements that limit such access for investigators                                                                                                                                     | 17,18      |
| 33<br>34<br>35<br>36<br>37                   | Ancillary and post-trial care | 30  | Provisions, if any, for ancillary and post-trial care, and for compensation to those who suffer harm from trial participation                                                                                                                                                       | 8          |
| 38<br>39<br>40<br>41<br>42<br>43<br>44       | Dissemination policy          | 31a | Plans for investigators and sponsor to communicate trial results to participants, healthcare professionals, the public, and other relevant groups (eg, via publication, reporting in results databases, or other data sharing arrangements), including any publication restrictions | 18         |
| 45<br>46<br>47                               |                               | 31b | Authorship eligibility guidelines and any intended use of professional writers                                                                                                                                                                                                      | 19         |
| 48<br>49<br>50                               |                               | 31c | Plans, if any, for granting public access to the full protocol, participant-level dataset, and statistical code                                                                                                                                                                     | 19         |
| 51<br>52                                     | <b>Appendices</b>             |     |                                                                                                                                                                                                                                                                                     |            |
| 53<br>54<br>55<br>56<br>57<br>58<br>59<br>60 | Informed consent materials    | 32  | Model consent form and other related documentation given to participants and authorised surrogates                                                                                                                                                                                  | Appendix A |

|                                                                                                                                                                                                                                                                                                                                                             |                      |    |                                                                                                                                                                                                |    |
|-------------------------------------------------------------------------------------------------------------------------------------------------------------------------------------------------------------------------------------------------------------------------------------------------------------------------------------------------------------|----------------------|----|------------------------------------------------------------------------------------------------------------------------------------------------------------------------------------------------|----|
| 1<br>2<br>3<br>4<br>5<br>6<br>7<br>8<br>9<br>10<br>11<br>12<br>13<br>14<br>15<br>16<br>17<br>18<br>19<br>20<br>21<br>22<br>23<br>24<br>25<br>26<br>27<br>28<br>29<br>30<br>31<br>32<br>33<br>34<br>35<br>36<br>37<br>38<br>39<br>40<br>41<br>42<br>43<br>44<br>45<br>46<br>47<br>48<br>49<br>50<br>51<br>52<br>53<br>54<br>55<br>56<br>57<br>58<br>59<br>60 | Biological specimens | 33 | Plans for collection, laboratory evaluation, and storage of biological specimens for genetic or molecular analysis in the current trial and for future use in ancillary studies, if applicable | NA |
|-------------------------------------------------------------------------------------------------------------------------------------------------------------------------------------------------------------------------------------------------------------------------------------------------------------------------------------------------------------|----------------------|----|------------------------------------------------------------------------------------------------------------------------------------------------------------------------------------------------|----|

\*It is strongly recommended that this checklist be read in conjunction with the SPIRIT 2013 Explanation & Elaboration for important clarification on the items. Amendments to the protocol should be tracked and dated. The SPIRIT checklist is copyrighted by the SPIRIT Group under the Creative Commons "[Attribution-NonCommercial-NoDerivs 3.0 Unported](https://creativecommons.org/licenses/by-nc-nd/3.0/)" license.

For peer review only
